# Supplementary material for: A machine learning approach for identifying anatomical biomarkers of early mild cognitive impairment
Source: PeerJ journal article supplement (doi:10.7717/peerj.18490), 2024-12-13
Supplement: PeerJ_Excel_raw_data.zip [file PeerJ_Excel_raw_data.zip]

## Sheet: aparc_volume_lh
Sub ID	Group	Age	gender	MMSE	Education	Handedness	Left-Lateral-Ventricle	Right-Lateral-Ventricle	Lateral-Ventricle	Left-Inf-Lat-Vent	Right-Inf-Lat-Vent	Inf-Lat-Vent	Left-Hippocampus	Right-Hippocampus	Hippocampus	Left-Amygdala	Right-Amygdala	Amygdala	Left-Accumbens-area	Right-Accumbens-area	Accumbens-area	MaskVol	BrainSegVol-to-eTIV	MaskVol-to-eTIV	lh_bankssts_volume	rh_bankssts_volume	bankssts_volume	lh_caudalanteriorcingulate_volume	rh_caudalanteriorcingulate_volume	caudalanteriorcingulate_volume	lh_caudalmiddlefrontal_volume	rh_caudalmiddlefrontal_volume	caudalmiddlefrontal_volume	Left-Caudate	Right-Caudate	Caudate	lh_cuneus_volume	rh_cuneus_volume	cuneus_volume	lh_entorhinal_volume	rh_entorhinal_volume	entorhinal_volume	lh_fusiform_volume	rh_fusiform_volume	fusiform_volume	lh_inferiorparietal_volume	rh_inferiorparietal_volume	inferiorparietal_volume	lh_inferiortemporal_volume
OAS30007	2	71.7594	1	29	18	R	16439.2	16155	32594.2	1159.2	614.6	1773.8	3980.8	4357.8	8338.6	1551.6	1673.7	3225.3	543.7	518.8	1062.5	1650773	0.677252	1.00574	2454	2340	4794	1417	2528	3945	5615	5461	11076	3616.9	3503.1	7120	2789	2922	5711	2404	2403	4807	9504	11101	20605	11104	12063	23167	12628
OAS30008	1	52.5094	2	30	12	R	4161.8	3751.7	7913.5	331.7	677.6	1009.3	3608.1	3938	7546.1	1665.5	1688.7	3354.2	485.7	523.1	1008.8	1533414	0.776213	1.11951	2011	1935	3946	1187	2083	3270	3517	4983	8500	3927.3	3838.2	7765.5	2481	3172	5653	1713	1587	3300	8296	9130	17426	10111	11742	21853	8437
OAS30009	1	49.2809	2	30	12	R	10768.2	6043.4	16811.6	302.2	359.4	661.6	3938.6	4291.8	8230.4	1950.1	1873.9	3824	614.9	709.5	1324.4	1715753	0.746656	1.06123	3497	2389	5886	1763	1631	3394	7070	7101	14171	3758.9	3941.8	7700.7	3968	3951	7919	2390	2320	4710	10155	11962	22117	13767	13937	27704	9364
OAS30010	1	68.6288	2	30	18	R	11916.1	11549.9	23466	452.4	408.5	860.9	3070.7	3204.5	6275.2	1187.1	1298.4	2485.5	401.5	424.6	826.1	1415511	0.710623	1.01166	1723	1778	3501	1774	1756	3530	4308	4226	8534	3810.6	3682.2	7492.8	2075	2764	4839	1154	1259	2413	8473	7483	15956	7609	9835	17444	7284
OAS30011	1	78.6727	2	28	12	R	19703.7	16940.1	36643.8	881.3	495.8	1377.1	3366.3	3463.5	6829.8	1211.6	1441.3	2652.9	211.2	260.2	471.4	1368232	0.67081	1.02258	1668	1491	3159	1133	1263	2396	4844	4519	9363	2769.9	2855.9	5625.8	2015	2183	4198	1852	1691	3543	6838	7426	14264	8066	9600	17666	7493
OAS30015	1	65.6321	1	30	18	R	13254.3	13598.1	26852.4	564.1	558.8	1122.9	3584.2	3790.1	7374.3	1505.5	1608.8	3114.3	640.9	501.9	1142.8	1608013	0.734605	1.02601	2022	1826	3848	759	2039	2798	6009	5459	11468	3389.7	3247.6	6637.3	3750	3927	7677	1663	1716	3379	8532	10183	18715	12846	11473	24319	10570
OAS30017	1	53.6999	2	29	16	R	7130	6237.8	13367.8	282.4	271.2	553.6	3576.2	4085.5	7661.7	1446.8	1550.9	2997.7	463.9	526.9	990.8	1472537	0.770905	1.10873	1586	1793	3379	1106	1746	2852	5733	4675	10408	3148.1	3230.6	6378.7	2964	2859	5823	2036	1781	3817	7933	7139	15072	9445	11319	20764	9902
OAS30020	1	52.0855	2	30	14	R	10575.5	8223.8	18799.3	428	389.5	817.5	3787.8	3721.7	7509.5	1243	1418.8	2661.8	575.2	583.7	1158.9	1557558	0.788833	1.11605	1993	1538	3531	1593	1322	2915	6417	5162	11579	3095.6	3227.8	6323.4	3847	2926	6773	2430	1533	3963	9907	9442	19349	10829	10348	21177	10042
OAS30021	1	70.0371	1	29	16	R	20635	13108.4	33743.4	771.7	837	1608.7	3980.6	4343.7	8324.3	1536.5	1529.8	3066.3	446.7	445.9	892.6	1590347	0.728011	1.04508	2176	1776	3952	1138	1701	2839	4218	3935	8153	2593.8	2722.3	5316.1	3927	4096	8023	1653	1855	3508	10068	9264	19332	10037	15279	25316	9403
OAS30025	2	65.4431	2	26	14	R	10223.2	10410.5	20633.7	237.5	264.3	501.8	3877.5	3835	7712.5	1473.2	1533.3	3006.5	555.1	578.4	1133.5	1480839	0.761941	1.07511	1854	1485	3339	1372	1415	2787	5292	5499	10791	3437	3553.4	6990.4	2508	2566	5074	1977	1506	3483	8192	7054	15246	9829	12802	22631	8348
OAS30027	2	70.4123	1	27	12	L	17995.3	17049.8	35045.1	470.2	803.4	1273.6	3883.9	3228.6	7112.5	1332	1142.5	2474.5	603.6	549.2	1152.8	1814702	0.695842	1.02934	2094	1639	3733	1401	2217	3618	6316	6496	12812	4428.2	3754.7	8182.9	3194	3099	6293	1636	1508	3144	12103	9731	21834	12492	15798	28290	11269
OAS30033	1	79.8093	2	29	13	R	17913.2	20442.6	38355.8	828.7	1734.8	2563.5	3738.9	3406.1	7145	1297.9	1208.7	2506.6	278.6	306.5	585.1	1381012	0.682474	0.980494	1822	1731	3553	1431	1047	2478	4486	4038	8524	4590.7	4429.8	9020.5	2173	2220	4393	1713	1188	2901	7950	7359	15309	9138	10401	19539	7990
OAS30034	1	65.2122	2	26	16	R	8472.6	8904	17376.6	438.1	305.9	744	3557.5	3573.9	7131.4	1214.1	1277.6	2491.7	398.6	569.6	968.2	1524781	0.744216	1.07277	2390	1934	4324	1549	1859	3408	4061	4869	8930	3346.2	3513.2	6859.4	2641	3212	5853	1564	1690	3254	7964	8706	16670	12057	13355	25412	8987
OAS30036	1	66.4638	2	30	20	R	8438.9	9901.2	18340.1	217	205.4	422.4	3653.7	3717.5	7371.2	1463.7	1553.2	3016.9	478.4	520.7	999.1	1626471	0.716877	1.03876	2322	2365	4687	1873	1787	3660	4945	5525	10470	3249.3	3303.1	6552.4	3485	3370	6855	2026	2190	4216	10366	9495	19861	9603	12056	21659	9661
OAS30038	2	73.5686	2	30	18	R	9016.1	8031.8	17047.9	411.6	1024.3	1435.9	4370.7	3763.7	8134.4	1700.7	1636	3336.7	537.6	475.2	1012.8	1572478	0.71942	1.01504	2008	2286	4294	1771	2198	3969	6132	5619	11751	3360	3469.1	6829.1	3244	3315	6559	2237	1791	4028	8874	9474	18348	10481	13202	23683	10342
OAS30039	1	73.556	2	30	18	R	17773.7	15367	33140.7	405.5	584.3	989.8	3747.6	3752.3	7499.9	1406.4	1445.7	2852.1	498.5	381.7	880.2	1433093	0.700498	0.974998	2348	1623	3971	1360	2057	3417	4868	4638	9506	3374	3460.4	6834.4	2848	2990	5838	1969	1847	3816	8905	7905	16810	11664	11535	23199	9096
OAS30042	1	68.886	2	30	18	R	9620.3	10177.3	19797.6	706.4	1101.6	1808	4165	4235.4	8400.4	1613.4	1619.3	3232.7	526.7	676.8	1203.5	1561286	0.756308	1.05734	2520	2654	5174	1236	2071	3307	6385	5556	11941	3917.1	4246.2	8163.3	3529	3547	7076	1541	1862	3403	8707	7530	16237	13405	14839	28244	10913
OAS30046	1	80.5699	1	30	19	R	20567.5	18283.2	38850.7	759.2	768.1	1527.3	4057.3	4295.8	8353.1	1883.4	1864.6	3748	454.9	409.3	864.2	1573606	0.684037	0.985611	1842	1561	3403	2135	1759	3894	4799	4403	9202	3458.1	3385.6	6843.7	3573	4758	8331	2339	2257	4596	9008	9593	18601	8020	9284	17304	10929
OAS30049	1	73.3661	1	30	14	L	18320.8	23252.3	41573.1	434.8	579.6	1014.4	3250.5	3447.3	6697.8	1199.6	1444.9	2644.5	321.2	433.7	754.9	1601284	0.696271	1.0191	2054	2037	4091	1331	1741	3072	5088	4637	9725	2706	2704.6	5410.6	2268	2889	5157	1806	2213	4019	8344	10100	18444	10438	12511	22949	11341
OAS30055	1	72.7605	1	30	16	R	13245.7	13633.3	26879	377.6	651.2	1028.8	3579.6	3497.3	7076.9	1335.5	1624.5	2960	536.5	642	1178.5	1621138	0.714071	1.01647	2165	1887	4052	2405	1741	4146	5520	6448	11968	3828	3989.3	7817.3	2531	3050	5581	1862	1753	3615	8214	10507	18721	12161	14217	26378	9986
OAS30057	2	81.5883	1	25	14	R	35196.8	25018.3	60215.1	1743	860.3	2603.3	3385.2	3645.2	7030.4	1548.3	1798	3346.3	320.6	423.7	744.3	1803801	0.680523	1.02395	1633	2970	4603	2073	2935	5008	3935	4628	8563	2830.6	2648.7	5479.3	2249	3090	5339	2128	2178	4306	8208	9030	17238	11005	11537	22542	8721
OAS30060	1	80.7955	2	27	15	R	14044.2	13100.1	27144.3	740.4	611.3	1351.7	3221.2	3259.9	6481.1	1057.4	1059	2116.4	282.1	375.1	657.2	1187465	0.692851	0.988831	1482	1655	3137	1477	1337	2814	4916	4492	9408	2890.5	2979.8	5870.3	2268	2176	4444	1762	1878	3640	6506	7687	14193	7285	10066	17351	7592
OAS30061	2	77.6172	1	29	16	R	36321.8	38009.9	74331.7	1669.6	1118.5	2788.1	3836.6	3959.8	7796.4	1632.3	1698.5	3330.8	201.9	330.8	532.7	1614776	0.653765	0.942329	1702	1458	3160	1147	1964	3111	4376	5272	9648	3934.9	3791.4	7726.3	2858	4432	7290	1912	1922	3834	9028	9136	18164	8484	11258	19742	9878
OAS30067	1	56.9783	1	29	16	R	9011.8	10214.2	19226	346.6	244.2	590.8	4282.3	4520.5	8802.8	1583.6	1675.1	3258.7	430.1	561.5	991.6	1476342	0.710405	1.05601	1514	1325	2839	1655	1984	3639	3700	3965	7665	2547.8	2691.5	5239.3	2795	2721	5516	1684	1655	3339	7593	6317	13910	6308	8078	14386	8452
OAS30071	2	77.0276	1	28	16	R	32089.1	28631.5	60720.6	1632.4	1224.2	2856.6	3043	2984.6	6027.6	1360.3	1485.4	2845.7	202.8	350.5	553.3	1821345	0.673789	1.05609	2424	1937	4361	1605	1908	3513	5323	4376	9699	3518.8	3293.8	6812.6	2575	3273	5848	1605	1393	2998	9459	8123	17582	12089	16668	28757	10160
OAS30072	2	77.879	1	29	20	R	19908.5	18336.5	38245	1440.6	1155.4	2596	4106.4	4027.6	8134	1530.1	1456.6	2986.7	320.9	400.4	721.3	1505263	0.688662	0.991402	1885	1756	3641	1300	1314	2614	4743	3631	8374	2663.4	2796.1	5459.5	3085	3291	6376	3197	2064	5261	8700	7196	15896	10373	12224	22597	11329
OAS30073	1	61.3316	1	30	19	R	13334.9	19518	32852.9	477.1	603.9	1081	4176.9	3923.5	8100.4	2048.5	1795.1	3843.6	545.1	596.6	1141.7	1732488	0.749547	1.04808	2668	1923	4591	2148	1200	3348	6780	8423	15203	3401.2	3366.7	6767.9	3806	3932	7738	2766	1582	4348	8736	9511	18247	12524	13915	26439	10900
OAS30075	1	80.9571	2	29	16	R	26200.2	26077.5	52277.7	1141.6	898.6	2040.2	3619.8	3413.6	7033.4	1267.5	1290.1	2557.6	301.1	432.5	733.6	1436187	0.669089	0.982242	1969	2104	4073	1212	1430	2642	4905	3826	8731	2719.4	2720.4	5439.8	2487	3430	5917	1659	1545	3204	8089	7015	15104	10345	11568	21913	8686
OAS30079	1	45.9528	2	30	18	L	5372.5	4942.2	10314.7	546.7	291.2	837.9	3926.3	3931	7857.3	1525.9	1766.5	3292.4	605.4	751.2	1356.6	1401942	0.73789	1.01543	1534	2104	3638	1598	1656	3254	5564	4498	10062	3348.1	3420.4	6768.5	1985	2510	4495	2146	1897	4043	7916	8747	16663	8946	11981	20927	10473
OAS30080	1	63.0233	2	29	20	R	5736.6	5404.9	11141.5	370.7	292.2	662.9	4083.3	4135.2	8218.5	1553.7	1720.5	3274.2	509.7	494.3	1004	1451799	0.729234	1.05026	2309	1954	4263	1502	1865	3367	5354	4671	10025	3146.1	3118.6	6264.7	1960	2569	4529	2027	1851	3878	9014	8805	17819	12111	13097	25208	10142
OAS30086	1	68.39	2	29	16	R	67583.8	73053.6	140637	2302.7	2146.4	4449.1	3203.6	3531.1	6734.7	1381.1	1452.5	2833.6	268.4	395	663.4	1899557	0.676256	0.989012	1758	1719	3477	1443	1672	3115	5953	5877	11830	4359	4940.9	9299.9	2262	3030	5292	1976	1829	3805	8694	8574	17268	11992	14462	26454	11555
OAS30088	1	85.8882	1	29	14	R	30862.8	29050.4	59913.2	1232.3	1134.7	2367	3527.9	3699.6	7227.5	1354.1	1410	2764.1	319.2	375.3	694.5	1478118	0.670904	1.00091	1528	1991	3519	1465	1733	3198	4789	4691	9480	4145.3	3741.7	7887	2900	3578	6478	1760	1770	3530	8161	8475	16636	11183	13277	24460	8663
OAS30089	1	78.3828	1	27	12	R	20626.8	30051.6	50678.4	1311.5	815.9	2127.4	3750.8	3890.2	7641	1417.8	1522.2	2940	244	291.7	535.7	1783664	0.745531	1.12496	1684	1619	3303	1901	1339	3240	4784	6057	10841	2987.2	3247.6	6234.8	3292	3023	6315	1425	1570	2995	8991	10382	19373	8539	10607	19146	9228
OAS30090	1	53.0876	1	30	16	R	6480.4	7287.4	13767.8	419.4	332.4	751.8	4458.4	4876.3	9334.7	2075.6	2125.3	4200.9	540.1	651	1191.1	1715625	0.770172	1.07588	2740	2478	5218	1545	2119	3664	5593	5784	11377	3951	3889.2	7840.2	3621	3930	7551	2082	2280	4362	9368	8943	18311	12464	15627	28091	11720
OAS30093	1	59.7655	2	30	16	R	7987.6	5797.3	13784.9	480.3	428.5	908.8	4151.5	4150.8	8302.3	1908.9	1715.9	3624.8	443.4	559.9	1003.3	1443510	0.75423	1.04552	1933	2115	4048	1618	1715	3333	5468	5340	10808	2996.8	3103.3	6100.1	2544	2841	5385	2189	1847	4036	9028	9486	18514	9318	13214	22532	9625
OAS30096	1	64.5166	2	30	16	L	7846.6	7677.2	15523.8	362.6	430	792.6	3485.7	3678.3	7164	1510.6	1324.5	2835.1	413.8	570.6	984.4	1309849	0.713885	1.02075	1872	1570	3442	1182	2342	3524	4789	6040	10829	3124.5	3102.5	6227	3502	3501	7003	1836	1517	3353	8913	7941	16854	8513	9538	18051	8178
OAS30099	1	66.2189	1	30	18	R	24013.1	26257.9	50271	820.8	1090.8	1911.6	4404.8	3582.5	7987.3	1886	1866.2	3752.2	422.8	491.2	914	1811790	0.722386	0.990894	2562	2754	5316	2195	1555	3750	7432	7245	14677	3864.3	4032.3	7896.6	3055	3246	6301	2720	2265	4985	9709	9564	19273	13065	17025	30090	12560
OAS30101	2	81.9782	2	29	12	R	13290.5	15981.2	29271.7	395.8	690.4	1086.2	3291.7	3477	6768.7	1445.3	1400.4	2845.7	269.3	305.9	575.2	1470134	0.688534	1.01065	2344	2258	4602	1299	1663	2962	5190	4895	10085	3283.3	3356.8	6640.1	2311	2362	4673	1483	3481	4964	8248	8100	16348	11640	13254	24894	9045
OAS30102	1	65.1366	2	26	12	R	14107.6	11311.3	25418.9	373.9	262.8	636.7	3776.5	3946.5	7723	1426.9	1559.4	2986.3	444	517.2	961.2	1321374	0.732285	0.992406	1931	1781	3712	1740	1711	3451	4012	3949	7961	3298.5	3531.9	6830.4	2282	3058	5340	1798	1764	3562	9841	9368	19209	10386	11651	22037	8569
OAS30105	1	69.7755	2	30	18	R	9046.6	7211.5	16258.1	321.4	602.9	924.3	3645.6	3858.7	7504.3	1382.7	1392	2774.7	454	444	898	1386824	0.728203	1.1053	1931	1585	3516	1030	1652	2682	4320	3402	7722	3082.9	3163.3	6246.2	2579	2478	5057	2090	1445	3535	7060	7313	14373	8810	12098	20908	9089
OAS30108	2	70.5866	2	28	12	R	6301	5434.2	11735.2	466.5	305.4	771.9	3696.1	3612.7	7308.8	1182.3	1427.4	2609.7	340.5	464.3	804.8	1326770	0.74444	1.02302	1820	1773	3593	2031	1853	3884	5349	4353	9702	2767.6	2749.1	5516.7	2644	3217	5861	1889	1512	3401	8247	8293	16540	8344	9717	18061	9122
OAS30109	2	84.865	2	28	13	R	23045.9	26203.1	49249	1820	2146.4	3966.4	2812.2	3040	5852.2	901.8	1309.1	2210.9	194.1	261.2	455.3	1435085	0.694471	0.996308	1855	1973	3828	2078	1718	3796	5057	4989	10046	2480.2	2778.8	5259	2018	2030	4048	769	1108	1877	7215	6346	13561	8349	9728	18077	6883
OAS30112	1	53.77	1	30	20	R	20157.4	17847.1	38004.5	549	500.5	1049.5	4648.7	4625.8	9274.5	1708.1	1911.3	3619.4	537.5	612.2	1149.7	1966951	0.725123	1.06427	1972	3735	5707	1696	3889	5585	7213	5961	13174	2852.4	2770.2	5622.6	4201	4575	8776	1702	2174	3876	11970	12449	24419	13837	17597	31434	12946
OAS30115	1	68.98	2	30	18	R	12970.7	12560.8	25531.5	448.3	275.1	723.4	3461.8	3789.2	7251	1470.4	1599.5	3069.9	456.9	441	897.9	1405882	0.78986	1.13912	1940	2155	4095	1351	1285	2636	3914	3856	7770	3234.4	3382	6616.4	2749	3148	5897	1180	1480	2660	8269	8102	16371	9409	11515	20924	8884
OAS30122	1	73.79	1	30	16	R	23028.9	19517.3	42546.2	862.7	657.4	1520.1	4366.7	4933.2	9299.9	1737.7	1930.4	3668.1	549.1	469.5	1018.6	1769170	0.709387	1.01531	2206	2028	4234	2095	1951	4046	7190	6959	14149	3209.9	3310.3	6520.2	3026	3682	6708	1917	1977	3894	9901	11390	21291	11997	14500	26497	12354
OAS30123	2	74.1488	1	28	13	L	18487.6	17811.4	36299	1195	997.4	2192.4	4006.4	4255	8261.4	1808.3	1892	3700.3	380.4	450.9	831.3	1733462	0.694439	1.02801	2652	1865	4517	1667	1821	3488	6061	3949	10010	2916.6	2960.7	5877.3	2476	2960	5436	2289	2165	4454	10008	9567	19575	10674	15166	25840	10249
OAS30127	1	65.8121	1	30	20	R	12044	13153.1	25197.1	580.5	666.3	1246.8	4346.4	4378.5	8724.9	1540.5	1680.4	3220.9	497	465.2	962.2	1671736	0.711694	1.00784	2355	2228	4583	1626	1255	2881	5185	4724	9909	2927.6	3090.8	6018.4	3581	4133	7714	1868	2402	4270	7889	8066	15955	10369	12714	23083	10512
OAS30129	1	71.6827	1	30	20	R	15323.7	11596.2	26919.9	379.4	722.7	1102.1	3402.6	3475.9	6878.5	1390.6	1479.2	2869.8	399.7	534.7	934.4	1470576	0.726918	1.04571	2006	1774	3780	1001	1876	2877	4774	4793	9567	3094.4	3332.1	6426.5	3044	3021	6065	1487	1519	3006	8600	7997	16597	9113	12859	21972	8685
OAS30131	1	49.7788	1	30	18	R	7457.4	6611.4	14068.8	230.8	286.6	517.4	3893.6	3689.6	7583.2	1712.4	1822.3	3534.7	600.9	551	1151.9	1583718	0.760027	1.06927	1811	1325	3136	1462	1570	3032	5361	6455	11816	3456.1	3395.7	6851.8	3324	3577	6901	2023	1565	3588	8037	8043	16080	9177	10117	19294	9827
OAS30132	2	71.3551	1	30	15	R	21201.2	19724.4	40925.6	568.7	546.2	1114.9	4053.2	4083	8136.2	1544.9	1718.3	3263.2	304.7	489.6	794.3	1634658	0.692721	1.05699	1467	1766	3233	1185	1463	2648	6008	5689	11697	3400.1	3290.4	6690.5	3415	3441	6856	1822	2142	3964	10681	9197	19878	11828	13857	25685	10060
OAS30138	1	78.6555	1	24	16	R	18467.6	19477.3	37944.9	788	1029.4	1817.4	3497.6	3315.1	6812.7	1460	1299.2	2759.2	409.8	339.2	749	1557822	0.67727	0.989833	2001	1677	3678	1826	2435	4261	5561	4782	10343	3093.6	3050	6143.6	2688	3048	5736	1557	1322	2879	7701	7893	15594	8492	11151	19643	8502
OAS30140	1	72.0176	2	28	15	R	18464.3	8598.8	27063.1	494.5	374.3	868.8	3661.5	3767.2	7428.7	1485.3	1533.9	3019.2	426.3	527.9	954.2	1407336	0.687138	1.02403	2159	1928	4087	1279	2160	3439	5222	4842	10064	2679	2643.1	5322.1	1767	1790	3557	1994	2061	4055	7121	6772	13893	9126	10784	19910	8763
OAS30142	1	66.75	1	29	14	R	18786.4	19197.5	37983.9	612.3	701.9	1314.2	3770.8	4292.8	8063.6	1612.3	1897.6	3509.9	400.7	551	951.7	1767689	0.690703	0.977752	2834	2401	5235	1802	2435	4237	4448	9097	13545	3642.1	3224.4	6866.5	3257	3908	7165	2062	2168	4230	8935	9555	18490	14532	15522	30054	12197
OAS30149	1	77.04	1	30	17	R	17951.1	7399.8	25350.9	1131.6	456.6	1588.2	3974.9	4367.5	8342.4	1700.1	1837.9	3538	475.9	554.2	1030.1	1629628	0.708786	1.01191	1622	1792	3414	1998	1371	3369	6874	6236	13110	2919.9	2937.4	5857.3	2975	3082	6057	1883	2545	4428	9369	9658	19027	9046	11204	20250	13446
OAS30159	2	78.8554	1	28	19	**	56486.9	50059.3	106546	3839.3	3020	6859.3	3689.1	3893.8	7582.9	1435.2	1786.9	3222.1	369.1	365.9	735	1866995	0.640842	1.02997	1207	1633	2840	1278	1449	2727	5312	4477	9789	2933.5	3525.2	6458.7	3134	4071	7205	1721	1568	3289	8389	8157	16546	8046	8350	16396	8998
OAS30160	1	71.0549	2	30	16	R	11662.4	11381.4	23043.8	234.4	395	629.4	4041.1	4449.6	8490.7	1506.3	1851.1	3357.4	485.3	571.5	1056.8	1590558	0.705235	1.06469	2038	1928	3966	1637	1390	3027	5218	5438	10656	2812.1	2994.3	5806.4	2002	2672	4674	1958	2027	3985	8322	8042	16364	11313	12115	23428	8494
OAS30163	1	70.4227	2	28	13	R	11350.8	11789.9	23140.7	622.1	780.7	1402.8	2851.5	3289.2	6140.7	1036.5	1455.5	2492	365.5	469.9	835.4	1416983	0.775277	1.23124	1729	1593	3322	2138	1118	3256	4528	4307	8835	2725.8	2656.9	5382.7	2545	3245	5790	821	1388	2209	6758	6760	13518	8644	11310	19954	6103
OAS30167	1	72.4382	1	26	16	R	18123.1	9932	28055.1	344.5	692.9	1037.4	3988.4	4215.9	8204.3	1571.7	2112.2	3683.9	475	740.7	1215.7	1753856	0.697975	1.01665	1895	2137	4032	1995	2872	4867	6736	7668	14404	3393.8	3341.4	6735.2	2570	2759	5329	1929	1986	3915	9852	9584	19436	12317	13356	25673	12885
OAS30168	1	61.5438	2	30	16	R	6981.8	4925.9	11907.7	363	708.9	1071.9	3779.7	3971.3	7751	1597.9	1619.1	3217	521.5	551.4	1072.9	1536910	0.741409	1.12078	1961	2259	4220	1380	1852	3232	4836	4644	9480	3670	3698.9	7368.9	2057	2644	4701	1689	2279	3968	8184	7883	16067	10981	12746	23727	9383
OAS30173	2	71.5987	2	26	10	R	15325.9	13337.5	28663.4	412.3	493.5	905.8	2936.9	3007.3	5944.2	865.6	1001	1866.6	439.2	356.9	796.1	1355761	0.694075	0.986945	1766	1866	3632	1398	1781	3179	6200	5171	11371	3068.9	3195.5	6264.4	3039	3925	6964	1304	1339	2643	8089	6957	15046	10678	12618	23296	8427
OAS30178	1	62.6161	2	30	20	R	12485.2	9806.1	22291.3	224	369	593	3868.3	4158.4	8026.7	1313.8	1549.1	2862.9	350.3	403.4	753.7	1650184	0.723738	1.02382	2759	1821	4580	2546	2166	4712	8361	8222	16583	3666.7	3832	7498.7	2507	2716	5223	2181	2506	4687	9855	9122	18977	12251	13294	25545	11443
OAS30179	2	78.0794	2	24	12	R	9162.5	10634.5	19797	508.1	650.4	1158.5	4015.5	3997.7	8013.2	1045.7	1597	2642.7	377.2	388	765.2	1370386	0.711436	1.01258	2079	1855	3934	2099	1591	3690	6435	5773	12208	3138.8	2784.8	5923.6	1709	2454	4163	1027	1191	2218	6538	5719	12257	8324	11068	19392	7218
OAS30180	1	78.9616	2	29	18	R	29385.6	39368	68753.6	2267	2081.9	4348.9	3193	2971.9	6164.9	1222	1387.1	2609.1	378.3	350.9	729.2	1389148	0.648122	0.951959	1730	1594	3324	993	1417	2410	4646	4512	9158	3617.1	3344.6	6961.7	1901	2111	4012	1903	1860	3763	6181	6260	12441	9560	10547	20107	7817
OAS30182	1	56.881	1	29	16	R	12248	10217.7	22465.7	602.8	477.4	1080.2	4430.3	4676	9106.3	1693.7	1899.6	3593.3	431.3	571.8	1003.1	1676630	0.71353	1.03449	2041	2382	4423	1531	1546	3077	5804	5535	11339	3608.9	3617.9	7226.8	3501	3581	7082	2070	2316	4386	9697	9717	19414	13379	14995	28374	12322
OAS30183	1	70.8677	2	30	12	R	11171.7	10831.4	22003.1	552.7	499.9	1052.6	3227.1	3497.7	6724.8	1346.2	1470.5	2816.7	434.3	463.8	898.1	1349671	0.700331	1.00729	1697	1798	3495	1455	1768	3223	4978	4464	9442	3221.8	3112.2	6334	2348	2226	4574	2120	2081	4201	8260	7873	16133	8867	10976	19843	7533
OAS30184	2	81.8959	2	26	12	R	16647.6	13524.5	30172.1	390.6	434.9	825.5	3088.9	3014.6	6103.5	1062	1214.4	2276.4	250.5	372.1	622.6	1289764	0.701421	0.989499	1356	1428	2784	1011	1972	2983	4185	4771	8956	2682.3	2964.7	5647	2863	3279	6142	1537	1388	2925	5441	7182	12623	7639	8673	16312	6011
OAS30187	1	69.7244	1	30	20	R	12909.7	14336	27245.7	555.4	690.5	1245.9	3157.3	3161.7	6319	1524.7	1273	2797.7	432.8	420.2	853	1498108	0.708307	1.01407	2534	1986	4520	1669	1595	3264	4095	3126	7221	2961.6	3179.1	6140.7	3621	3445	7066	1158	1414	2572	8947	8204	17151	10892	14209	25101	9115
OAS30189	1	68.32	2	29	12	R	17368.3	14730.3	32098.6	206.3	663.6	869.9	2264.9	3801.5	6066.4	709.6	1255.8	1965.4	300.9	335.4	636.3	1249549	0.681826	0.984858	1551	2030	3581	855	1385	2240	4379	4152	8531	2312.7	2279.6	4592.3	2686	2280	4966	2231	1346	3577	6635	6955	13590	8990	9906	18896	7715
OAS30193	1	74.5994	1	26	18	R	20409.5	19439.7	39849.2	597.6	958.8	1556.4	4236.2	4378.3	8614.5	1597.6	1509.7	3107.3	274.7	389.6	664.3	1582661	0.672546	1.0026	1172	1859	3031	1717	1323	3040	4508	4783	9291	2812.7	2616.4	5429.1	2602	2844	5446	1662	2356	4018	7893	8175	16068	10277	12469	22746	9527
OAS30194	2	81.3562	1	29	20	R	43468.4	42992	86460.4	2328.8	1067.6	3396.4	3522.9	4110.8	7633.7	1129.7	1950	3079.7	435.9	522.4	958.3	1799074	0.641366	0.952437	2121	1731	3852	2317	2620	4937	6523	5776	12299	5352.9	4356.9	9709.8	2813	3373	6186	1294	2001	3295	9385	8393	17778	10285	15875	26160	9768
OAS30195	1	67.1659	1	30	16	R	19802.7	17568.5	37371.2	430.6	521.3	951.9	3839.1	3807.1	7646.2	1471.3	1424.9	2896.2	258.6	434.3	692.9	1446918	0.716905	0.998348	1635	2059	3694	1730	1898	3628	5777	4981	10758	3015.9	3384.9	6400.8	3082	3426	6508	2336	2083	4419	7659	7911	15570	9739	11928	21667	9070
OAS30197	1	77.1893	2	28	16	R	33952.6	37853	71805.6	857.7	930.8	1788.5	3251.8	3091.9	6343.7	1232.4	1270.4	2502.8	440.4	422.1	862.5	1452868	0.678304	1.01973	1515	1759	3274	838	1557	2395	6180	5494	11674	2958.1	3077.2	6035.3	2905	2970	5875	1556	1624	3180	8940	8057	16997	9068	11184	20252	9752
OAS30200	1	53.6683	1	30	16	R	11904.8	9189.5	21094.3	650.3	450.3	1100.6	4662.5	4998.2	9660.7	1830.5	1955.3	3785.8	623.5	646.5	1270	1724515	0.771785	1.02626	2278	2767	5045	2273	2004	4277	6298	7114	13412	3735.5	3868.8	7604.3	2404	3381	5785	2742	2342	5084	11239	11211	22450	13100	17004	30104	12371
OAS30201	1	70.2138	1	30	16	R	14966	13239.3	28205.3	430	329.5	759.5	3507.7	3587.6	7095.3	1524.3	1548.6	3072.9	471.6	395.4	867	1534170	0.7236	1.03656	1838	1822	3660	1224	1439	2663	3908	4261	8169	3122.6	3374.3	6496.9	2659	3043	5702	2264	2527	4791	8031	8486	16517	10721	15437	26158	10519
OAS30204	1	69.1955	1	29	20	R	15212.7	12509.5	27722.2	741.6	404.6	1146.2	3705.1	3897.3	7602.4	1749.4	1724.3	3473.7	361.3	347.5	708.8	1579448	0.703915	1.01587	2002	2130	4132	1662	1290	2952	5335	5980	11315	2777.6	2984.2	5761.8	3057	3382	6439	2452	2086	4538	8434	8652	17086	12341	13987	26328	10245
OAS30205	2	78.2994	2	29	16	R	13103	13697.4	26800.4	538.1	560.6	1098.7	3401.1	3498.3	6899.4	1064.4	1305.1	2369.5	293.4	396.3	689.7	1377253	0.697291	0.987385	1514	1799	3313	1652	1534	3186	5254	5434	10688	2554.1	2871.6	5425.7	2375	2886	5261	1358	1416	2774	8461	8210	16671	9410	13893	23303	8283
OAS30208	2	76.7306	2	29	18	R	21031.4	12314.4	33345.8	254.3	273.9	528.2	3258.7	3669.6	6928.3	1270.5	1700.2	2970.7	330.3	426.4	756.7	1466463	0.697845	1.00493	2151	2102	4253	1346	1643	2989	4870	5637	10507	2950.2	3073.1	6023.3	2478	2487	4965	926	1498	2424	8793	9337	18130	9534	13626	23160	9966
OAS30211	2	52.5585	1	30	18	R	12325	9351.5	21676.5	304.6	422.7	727.3	4693.6	4831	9524.6	2351.7	2617.7	4969.4	498.9	548.8	1047.7	1938561	0.715876	1.03377	2504	2645	5149	3116	1764	4880	6069	7047	13116	3645.7	3727.7	7373.4	3382	3854	7236	1908	2181	4089	11795	11555	23350	10590	14298	24888	11961
OAS30212	2	79.9427	2	23	10	R	21352.8	14885.5	36238.3	1139	656.1	1795.1	3314.2	3681.5	6995.7	1236.5	1357.3	2593.8	355.4	427.4	782.8	1415569	0.701946	0.960798	1765	2154	3919	1186	1955	3141	5430	4004	9434	3540.1	3137.9	6678	2263	3254	5517	1788	1919	3707	8570	9930	18500	10026	12401	22427	9521
OAS30213	1	46.1538	2	30	16	R	3672.2	3987.7	7659.9	355.1	345.2	700.3	4152.2	4311.1	8463.3	1675.8	1616.1	3291.9	599.8	629	1228.8	1494177	0.751766	1.04159	2239	2234	4473	2110	1554	3664	5922	5811	11733	3002.2	3239.9	6242.1	2637	2955	5592	1753	2124	3877	8317	8343	16660	10240	11824	22064	9960
OAS30219	1	59.0677	2	30	16	R	4121.6	4237.3	8358.9	155.8	189.9	345.7	4091.5	4272.4	8363.9	1413.2	1548.9	2962.1	430.3	444.8	875.1	1480776	0.764617	1.05724	2308	2072	4380	1962	1839	3801	4832	4809	9641	2796.1	2844.6	5640.7	3202	3544	6746	1642	1773	3415	7789	7875	15664	10692	13492	24184	8980
OAS30220	1	64.3888	1	30	18	R	8448.3	8634.8	17083.1	398.4	378.2	776.6	3410.6	3374.2	6784.8	1354	1377.3	2731.3	525.4	581.7	1107.1	1451865	0.754152	1.05665	1362	2160	3522	1088	1785	2873	5496	4753	10249	3110	3148.4	6258.4	3172	3514	6686	1751	1598	3349	10168	10110	20278	8725	10897	19622	9392
OAS30221	1	60.1094	2	30	14	L	9870.1	9309.2	19179.3	575.1	443	1018.1	3899	3941.4	7840.4	1480.4	1544	3024.4	464.4	530.1	994.5	1414784	0.727964	1.03303	1989	2079	4068	1068	2299	3367	4444	4664	9108	3063.3	3144.5	6207.8	2501	2718	5219	1551	1767	3318	8086	7234	15320	11925	11984	23909	9130
OAS30223	2	82.0534	2	27	13	R	32010.5	29972	61982.5	1907.4	1770.4	3677.8	3400.6	3263.5	6664.1	1306.7	1231.2	2537.9	390.3	372.3	762.6	1495789	0.647877	0.992763	2128	1888	4016	1265	911	2176	4833	3638	8471	3603.8	3261.9	6865.7	2143	2525	4668	1457	1371	2828	7329	6339	13668	9404	10459	19863	7543
OAS30224	2	84.0138	1	25	18	R	34995.3	21865.9	56861.2	4176.3	2213.1	6389.4	3119.4	3272.8	6392.2	1220.4	1284.5	2504.9	334.5	355.4	689.9	1544420	0.649081	0.942737	2025	1806	3831	1885	1713	3598	5279	4585	9864	3198.8	2506.9	5705.7	2359	3291	5650	1001	741	1742	7443	5638	13081	9001	10547	19548	9274
OAS30227	1	58.56	2	30	18	R	14387	12307.5	26694.5	429.8	493.6	923.4	4443.6	4417.6	8861.2	1529.8	1534.2	3064	414.4	513.7	928.1	1506636	0.705232	1.01409	2664	1909	4573	1555	1762	3317	5780	5023	10803	3323.7	3428.8	6752.5	2638	2973	5611	1673	2180	3853	8432	8431	16863	12443	15320	27763	10512
OAS30229	1	72.7104	1	29	19	R	20125.5	18649.9	38775.4	1481.7	1826.9	3308.6	3311.5	3711	7022.5	1184.6	1850.8	3035.4	398.7	511.5	910.2	1553629	0.652148	0.989098	2234	1879	4113	1257	1453	2710	5804	4550	10354	3605.8	3775.2	7381	3017	3514	6531	1548	1741	3289	8429	9614	18043	9734	11498	21232	9472
OAS30232	1	66.0532	2	30	15	R	15866.6	13502.5	29369.1	704.2	502.1	1206.3	3204.8	3600.3	6805.1	1332.9	1411.7	2744.6	444.8	504.2	949	1566691	0.761482	1.13892	2354	1721	4075	2098	1951	4049	4531	5807	10338	3106	3284.2	6390.2	2755	3177	5932	1951	2230	4181	7392	6750	14142	10057	12495	22552	9214
OAS30234	2	85.5254	2	30	13	R	23815.9	30530	54345.9	1234.8	937.3	2172.1	3366.7	3229.6	6596.3	1261.6	1481.8	2743.4	434.4	417.7	852.1	1471432	0.649849	0.925736	1890	1858	3748	1408	2348	3756	5425	4443	9868	3518	2885.8	6403.8	2699	2855	5554	2280	1610	3890	7805	8329	16134	9497	14377	23874	8838
OAS30235	1	57.846	1	30	15	**	13157.7	13426.1	26583.8	303.3	554.5	857.8	4438.7	4609.1	9047.8	1729.5	1933.3	3662.8	549	503.3	1052.3	1677110	0.741142	1.04331	2501	1773	4274	1926	1989	3915	7527	6759	14286	3190.6	3371.1	6561.7	2853	3233	6086	2306	2639	4945	8908	8425	17333	11326	13556	24882	11631
OAS30236	1	69.9443	1	29	12	R	59006.1	44902	103908	2218	1739.2	3957.2	2872.3	3237.2	6109.5	1252.9	1521.7	2774.6	260.3	388.8	649.1	1613951	0.672229	1.01155	1662	1570	3232	1808	1278	3086	4581	4463	9044	3235.1	3462.4	6697.5	2701	3304	6005	1834	1550	3384	7988	8930	16918	8429	11042	19471	9371
OAS30242	1	65.1304	2	29	15	L	9365.7	9127.1	18492.8	392	361.6	753.6	4315.5	4466.3	8781.8	1732.1	1970.2	3702.3	493.8	403.3	897.1	1566511	0.821127	1.21224	2036	1702	3738	1327	2371	3698	6490	5618	12108	3054.5	3367.8	6422.3	2503	2691	5194	2329	2148	4477	9131	8169	17300	8769	11053	19822	8480
OAS30245	1	62.761	2	30	16	R	21558.4	18371.9	39930.3	248.1	208.8	456.9	3768.4	3682.5	7450.9	1241.8	1533.7	2775.5	375.4	461.9	837.3	1576044	0.727195	0.994635	2691	1854	4545	2392	1521	3913	7047	6346	13393	2797.4	3089.5	5886.9	2804	3257	6061	1573	1463	3036	10499	10193	20692	12666	14200	26866	9650
OAS30246	1	73.5704	2	28	18	R	18919.5	18516.9	37436.4	444.7	408.6	853.3	3903.5	4079.3	7982.8	1481.8	1551.3	3033.1	415.8	380.1	795.9	1641395	0.696667	1.03378	1859	1670	3529	1935	1420	3355	6250	4578	10828	3406.4	3597.4	7003.8	3256	3244	6500	1722	1859	3581	8607	8492	17099	10858	11627	22485	10350
OAS30247	1	75.4665	2	28	12	R	25452.6	19144.3	44596.9	1096.7	1417.6	2514.3	3534.5	3485.5	7020	1462	1359.1	2821.1	293.1	323.9	617	1351052	0.689185	0.97261	1292	1425	2717	1414	1756	3170	5098	4951	10049	3741.5	3076.1	6817.6	2176	2962	5138	1881	1663	3544	7876	8447	16323	9134	10054	19188	9426
OAS30248	1	68.7666	1	30	18	R	10680.3	17715.5	28395.8	482.7	461.3	944	4362.9	3888.3	8251.2	1843.8	1879.1	3722.9	439.3	473.3	912.6	1718044	0.729924	1.02346	2376	2061	4437	1546	1903	3449	7261	6187	13448	3610.5	3285.5	6896	3250	3136	6386	2415	2127	4542	11717	11269	22986	11605	15638	27243	13020
OAS30250	2	71.5414	1	29	12	R	18934.5	21023.3	39957.8	823	869.6	1692.6	3715.8	3647.9	7363.7	1531.3	1577.7	3109	407.3	434.3	841.6	1708879	0.680075	0.991123	3042	2111	5153	2017	1772	3789	6129	4923	11052	2806.1	2997.1	5803.2	2856	2630	5486	1460	1617	3077	10108	10938	21046	12644	14949	27593	11154
OAS30254	2	75.3383	2	26	16	R	8644.5	7151.5	15796	304.8	489	793.8	3242.4	3458.8	6701.2	1193.2	1281.3	2474.5	362.2	392.3	754.5	1271622	0.696513	1.09031	1583	1358	2941	1652	1764	3416	5232	4626	9858	2685	2806.9	5491.9	1915	2275	4190	1432	1609	3041	7073	7117	14190	8084	9096	17180	7174
OAS30263	2	73.5134	2	28	12	R	19504.1	14624.8	34128.9	889.9	717.7	1607.6	3525.6	3785.9	7311.5	1178	1689.9	2867.9	503	551.9	1054.9	1621306	0.818765	1.2506	1792	1821	3613	1712	1232	2944	6395	4935	11330	3166.7	3303.1	6469.8	2846	3246	6092	1812	1979	3791	8020	8288	16308	10015	13105	23120	8458
OAS30268	1	66.3966	1	29	18	R	19028.5	14963.7	33992.2	847.2	596.1	1443.3	4122	4498.8	8620.8	1792.1	1931.8	3723.9	448.4	545	993.4	1698183	0.707897	1.02029	2182	2339	4521	1334	2311	3645	6591	4966	11557	5225.5	4860.9	10086.4	2258	2492	4750	1779	1729	3508	10143	10137	20280	11947	15061	27008	12155
OAS30269	1	67.6444	1	28	18	**	37042.1	44503.7	81545.8	679.8	783.4	1463.2	3456	3339.3	6795.3	1287.2	1431.1	2718.3	558.7	526.6	1085.3	1644150	0.690349	1.00479	2181	2030	4211	2447	2161	4608	4895	4474	9369	3303.3	3532.4	6835.7	3260	4340	7600	1405	1367	2772	10875	10324	21199	10163	13026	23189	8756
OAS30270	1	70.7944	2	30	12	R	10520.8	10771.2	21292	512.7	498.6	1011.3	4089.7	3803.9	7893.6	1549.5	1381.9	2931.4	340.3	348.1	688.4	1379198	0.741889	1.10725	2344	1445	3789	1211	1653	2864	5075	4244	9319	2403.7	2613	5016.7	2317	2776	5093	1758	1642	3400	7097	6637	13734	9320	12334	21654	7518
OAS30272	1	65.9083	2	29	16	R	13067.6	7430.3	20497.9	328.6	245.8	574.4	4121.6	3973.3	8094.9	1891.2	1667.4	3558.6	542.9	711.6	1254.5	1506521	0.744387	1.03434	2202	2395	4597	2330	1715	4045	5460	5182	10642	3379.1	3282.2	6661.3	2820	2856	5676	1993	1972	3965	10476	7572	18048	9514	12577	22091	9316
OAS30273	2	63.13	1	26	13	R	19033.8	14543.2	33577	243.3	369.5	612.8	3249.9	3732.5	6982.4	1471.3	1470.2	2941.5	452	563.2	1015.2	1586237	0.694682	0.986972	1819	1845	3664	1699	1397	3096	6534	5861	12395	3168.8	3224.1	6392.9	2453	2823	5276	1821	1603	3424	8392	9233	17625	9939	13201	23140	11431
OAS30276	1	57.5532	2	30	16	R	7626.9	7112.9	14739.8	110.7	319.4	430.1	3908.1	4069.4	7977.5	1450.8	1749.1	3199.9	391.1	494.7	885.8	1502733	0.733638	1.02323	1888	1454	3342	2070	2224	4294	6037	6024	12061	3070.8	3105.9	6176.7	3303	3357	6660	1866	1626	3492	8533	8649	17182	8796	10890	19686	10969
OAS30277	1	73.0098	2	29	18	R	20217.7	18657.3	38875	929.4	814.8	1744.2	3638	3788.5	7426.5	1736.3	1608.9	3345.2	480.6	411.9	892.5	1461621	0.716745	1.0482	1986	1944	3930	1088	1662	2750	4568	3601	8169	3524.6	3593.6	7118.2	2281	3166	5447	1769	1828	3597	8687	8725	17412	9852	10293	20145	8997
OAS30280	1	72.416	1	28	12	L	29386.8	26343.8	55730.6	972.1	1145.2	2117.3	3748.1	4297.5	8045.6	1983.2	1889.9	3873.1	550.7	427.7	978.4	1847242	0.697742	1.01929	3042	2344	5386	881	2434	3315	6353	5174	11527	4116.5	4291.1	8407.6	2845	3331	6176	1525	2058	3583	9829	9977	19806	13261	17879	31140	12478
OAS30283	1	74.0977	2	30	18	L	14967.1	12808	27775.1	769.8	652.3	1422.1	3422.1	3623.6	7045.7	1203.6	1272.4	2476	422.9	546.9	969.8	1373235	0.697879	0.9877	1835	1584	3419	1275	2149	3424	4928	4293	9221	2827.1	2995.6	5822.7	2928	2925	5853	1617	1323	2940	7298	7047	14345	8023	10576	18599	7276
OAS30285	1	45.8127	2	30	18	R	5743.4	4649.5	10392.9	334.3	215.7	550	3309.9	3498.6	6808.5	1471.4	1371.4	2842.8	514.9	600	1114.9	1459249	0.767239	1.08889	2408	1915	4323	1253	1689	2942	5547	4957	10504	2882.5	2977.9	5860.4	2409	3089	5498	1559	1748	3307	9471	9207	18678	9588	13838	23426	9242
OAS30289	1	65.0943	2	28	14	R	9046.3	7144.2	16190.5	124.5	187.6	312.1	3358.9	3510.2	6869.1	1602.6	1548.4	3151	512.8	584.3	1097.1	1535970	0.746614	1.1077	2479	2274	4753	1541	2150	3691	4460	4139	8599	3423.9	3474.6	6898.5	2313	2719	5032	1809	1899	3708	8884	10144	19028	10483	12755	23238	9208
OAS30290	1	47.46	1	30	16	R	9439.3	5745	15184.3	346.7	278.3	625	4174.5	4460.2	8634.7	2010.2	1766.5	3776.7	460.4	553.6	1014	1671393	0.754003	1.00671	3086	2323	5409	1571	2338	3909	5261	5223	10484	3429.4	3535.7	6965.1	3475	4119	7594	2302	1781	4083	10340	9430	19770	11632	14535	26167	11218
OAS30291	1	66.5766	2	30	12	R	28702.5	40019.6	68722.1	651.2	773.9	1425.1	3147.8	2929.2	6077	1172.9	1218.7	2391.6	387	360	747	1577249	0.712264	1.01696	1892	1880	3772	971	1989	2960	4846	4339	9185	3220.9	3246.6	6467.5	2351	2825	5176	1353	1415	2768	8630	8328	16958	9163	12386	21549	9142
OAS30293	1	56.8755	2	30	18	R	17855.7	14737.1	32592.8	273.8	190	463.8	4369	4524.6	8893.6	1998.6	1987	3985.6	502.3	558.2	1060.5	1703484	0.752167	1.06068	2349	2148	4497	1542	1925	3467	6212	6024	12236	3300.9	3429	6729.9	3592	3517	7109	2218	2007	4225	10914	8133	19047	11557	16338	27895	14432
OAS30296	1	88.9416	2	27	13	R	9903.3	16561.2	26464.5	599.3	830.1	1429.4	3043.1	3002	6045.1	983.9	1450.8	2434.7	300.6	377.8	678.4	1229096	0.735095	1.06539	1777	1254	3031	1508	1191	2699	3691	4806	8497	2635.2	2703.1	5338.3	1843	2338	4181	1389	1492	2881	7445	7197	14642	7147	9300	16447	7712
OAS30297	1	49.3816	2	30	16	R	7764.2	7637.9	15402.1	248	391.4	639.4	3517.3	3480.9	6998.2	1472.5	1576.7	3049.2	378	529	907	1456912	0.769167	1.10621	2165	2004	4169	1066	1241	2307	5274	5508	10782	3368.9	3397	6765.9	2826	2787	5613	1626	1332	2958	7003	7100	14103	11881	12627	24508	9788
OAS30299	1	75.3704	2	27	12	R	11809.3	18171.9	29981.2	466.9	586.1	1053	3740.7	3260.7	7001.4	1471.6	1447.8	2919.4	442.3	497.4	939.7	1642510	0.707588	1.06538	1809	1932	3741	2146	1379	3525	6584	5760	12344	3356.4	3446.1	6802.5	2242	2722	4964	1987	1431	3418	7577	8905	16482	9562	11514	21076	9560
OAS30300	1	56.4277	2	30	12	R	20381.4	12583.8	32965.2	235.4	375.4	610.8	4172.9	4343.2	8516.1	1390.2	1805.7	3195.9	459.8	528.9	988.7	1514101	0.729864	1.01375	2280	1625	3905	2271	1768	4039	4673	4587	9260	3102.9	3136.5	6239.4	2826	3320	6146	1866	2218	4084	8561	8653	17214	11213	13373	24586	10342
OAS30304	1	68.815	1	29	18	R	9227.3	9702.9	18930.2	380.6	316.2	696.8	4359.9	5014.5	9374.4	2076.2	2159.3	4235.5	700.4	702.1	1402.5	1714425	0.750504	1.0233	2529	2394	4923	1948	1561	3509	6629	4846	11475	3285	3516.6	6801.6	3658	4137	7795	1942	1995	3937	11612	10952	22564	11825	15156	26981	11205
OAS30306	1	72.4777	1	30	18	R	19681.3	19031.5	38712.8	647.9	702.2	1350.1	3713.9	3991.8	7705.7	1527.7	1776.5	3304.2	456.4	552.8	1009.2	1598269	0.682437	0.994796	1913	1932	3845	2238	1816	4054	5210	5490	10700	2976.5	2935.8	5912.3	3035	3033	6068	1920	1997	3917	10396	9742	20138	9573	13750	23323	9658
OAS30307	1	77.4889	1	29	16	R	17463.6	17259.3	34722.9	1288.6	822.2	2110.8	4035.4	4372.6	8408	1765.7	1893.7	3659.4	385.7	468	853.7	1683171	0.689863	1.03672	1773	1962	3735	2203	1762	3965	5076	6537	11613	4047.8	3932.4	7980.2	3204	3136	6340	2061	1931	3992	8277	9150	17427	9951	13445	23396	8632
OAS30308	1	55.8211	2	30	18	R	17224.6	17679.4	34904	534.4	249.6	784	3805.5	3780.8	7586.3	1808.8	1955.5	3764.3	421	468.8	889.8	1612007	0.770553	1.13524	1927	1916	3843	1241	2018	3259	5540	4655	10195	3633.8	3728.5	7362.3	2852	3434	6286	1894	1707	3601	8672	8096	16768	9239	11285	20524	8905
OAS30309	1	66.161	2	30	16	R	9446.7	9730.4	19177.1	399	372.1	771.1	4042	4093	8135	1656.5	1883.1	3539.6	420.3	559.8	980.1	1482524	0.834813	1.22628	1971	1971	3942	2039	1995	4034	5809	5427	11236	3063.2	3028.2	6091.4	2697	3163	5860	2074	2074	4148	10361	9224	19585	10497	10479	20976	11219
OAS30318	2	72.9174	1	28	16	R	36648.7	28625.5	65274.2	1368	1199.8	2567.8	3432.5	3535.2	6967.7	1600.3	1899.9	3500.2	245.4	364.5	609.9	1629619	0.663518	0.947812	2311	1434	3745	1781	1504	3285	5460	5006	10466	3739.9	3367.5	7107.4	3118	6168	9286	1537	1666	3203	8591	7612	16203	9654	13044	22698	8375
OAS30319	1	52.5794	2	28	12	R	8243.3	6048.1	14291.4	409.3	302.5	711.8	4431.9	4796.9	9228.8	1719.8	1755.5	3475.3	487.7	568.1	1055.8	1561498	0.736724	1.0157	3259	2249	5508	2441	1355	3796	5647	5687	11334	3037.2	2990.5	6027.7	2513	2653	5166	2031	2313	4344	9302	8790	18092	13869	15637	29506	11886
OAS30321	1	65.9683	2	30	16	L	4531.1	4259.2	8790.3	278.5	223.2	501.7	3984.8	3990.3	7975.1	1263.1	1428.5	2691.6	440.6	541.9	982.5	1423360	0.711048	1.05588	1810	1672	3482	1806	1175	2981	5033	4685	9718	3518.2	3402.2	6920.4	2687	3448	6135	1636	1684	3320	10402	8799	19201	10401	13007	23408	9321
OAS30324	1	60.4204	2	29	24	R	14486.5	12293.5	26780	638.1	448.6	1086.7	4164.2	4509.2	8673.4	1714	1795.6	3509.6	517.2	518	1035.2	1429633	0.692914	1.0234	1555	1399	2954	1860	1571	3431	5241	3579	8820	2993.4	2631.4	5624.8	2573	3347	5920	2029	1628	3657	7241	7808	15049	8646	8221	16867	9587
OAS30326	2	74.5248	2	28	12	R	23179.9	25005.5	48185.4	973.2	938.1	1911.3	3386.4	3312.5	6698.9	938.9	1285	2223.9	239.6	373.6	613.2	1495042	0.674461	1.04083	1787	1832	3619	1430	1859	3289	4472	4401	8873	2969.2	3037.8	6007	2252	2374	4626	1670	1425	3095	8470	8485	16955	10013	11530	21543	7229
OAS30328	1	72.9016	1	28	14	R	9677.8	9582.4	19260.2	388	467.3	855.3	3396.2	3594.2	6990.4	1301	1418	2719	340.6	409.7	750.3	1483079	0.711887	1.03762	1443	1694	3137	1700	1592	3292	5796	6567	12363	2938.9	3078.5	6017.4	2957	3187	6144	2104	2327	4431	9224	8070	17294	9271	10610	19881	9609
OAS30331	2	75.3713	1	29	12	R	37049.4	22016.9	59066.3	833.8	563.1	1396.9	3037.3	2971.8	6009.1	1302.7	1529.9	2832.6	337.5	422.2	759.7	1418156	0.641617	0.940636	2108	2003	4111	1366	2009	3375	5284	4557	9841	3130.9	3080.2	6211.1	1956	2944	4900	1275	1861	3136	7285	7906	15191	9673	12474	22147	9765
OAS30333	1	70.4282	1	29	20	R	20019.2	17713.9	37733.1	916.8	633.9	1550.7	4227.8	4301.9	8529.7	2020.6	1816.6	3837.2	361	545	906	1719850	0.708489	1.01767	2542	2348	4890	1343	2186	3529	5084	5657	10741	3481.8	3880.6	7362.4	3333	3291	6624	1788	2176	3964	9871	11032	20903	12942	14818	27760	10601
OAS30335	1	66.7527	2	29	16	L	10038.5	12567.7	22606.2	43.4	123.4	166.8	3278.4	3392.2	6670.6	1238.3	1405.5	2643.8	320.5	362.1	682.6	1533268	0.720442	1.00364	1348	1604	2952	1372	2805	4177	5860	5943	11803	2588.3	2632.8	5221.1	2447	2927	5374	2033	1598	3631	8267	9090	17357	10648	12732	23380	9767
OAS30336	1	74.3933	1	28	16	R	21640.7	16328.1	37968.8	958	683.6	1641.6	4218.8	4555.1	8773.9	1763.2	1877.6	3640.8	416	436.5	852.5	1668634	0.664009	1.00603	1959	1948	3907	1977	2850	4827	4562	6212	10774	3169.9	3381.7	6551.6	2796	3655	6451	2034	1788	3822	9447	9371	18818	11467	13481	24948	9986
OAS30337	1	68.5277	2	29	14	L	4828.8	3890.6	8719.4	266.3	461	727.3	3956.7	4231.8	8188.5	1513.7	1582.4	3096.1	574.2	585	1159.2	1459229	0.773828	1.09336	2318	2039	4357	2015	1758	3773	5387	4809	10196	3308.7	3271.4	6580.1	2893	3168	6061	1857	1615	3472	8820	8814	17634	11240	11188	22428	10783
OAS30339	1	73.9333	1	29	16	R	20070.2	15945.9	36016.1	2437.1	1756.3	4193.4	3872.9	4142.5	8015.4	1370.9	1587.4	2958.3	415.1	415.8	830.9	1755175	0.67009	1.00339	2191	2365	4556	1725	1620	3345	6179	4985	11164	2996	2788.1	5784.1	3414	3804	7218	1770	2244	4014	9617	8545	18162	11114	13396	24510	9295
OAS30340	1	67.7144	2	30	18	R	5056.6	6527.2	11583.8	182.8	315.8	498.6	3801.6	3873.5	7675.1	1590.7	1475.7	3066.4	431.1	598.3	1029.4	1411629	0.748389	1.05852	1914	1725	3639	1370	1680	3050	4193	3846	8039	2649.8	3000.5	5650.3	2014	2955	4969	1741	1849	3590	7823	8412	16235	10432	11799	22231	9238
OAS30341	2	69.2594	2	30	18	R	10215.4	9184.7	19400.1	537.1	927.6	1464.7	3086.4	2918	6004.4	1128	1027.2	2155.2	420.6	472.8	893.4	1333750	0.706855	1.01204	1561	1522	3083	1503	1600	3103	5382	4519	9901	3336.1	3355.9	6692	2134	2853	4987	1690	1491	3181	7450	6614	14064	6993	10220	17213	8516
OAS30344	2	81.4261	1	26	12	R	42035.9	40530.9	82566.8	2546.7	3522.3	6069	3660.7	3500.5	7161.2	1442.7	1684.7	3127.4	534.2	537.1	1071.3	1679867	0.654109	0.947006	1659	1789	3448	1906	2173	4079	5744	5632	11376	4075.5	3907.7	7983.2	3707	4366	8073	1947	2114	4061	9429	10692	20121	10651	13949	24600	12654
OAS30346	1	72.4305	2	30	12	R	12860.1	10338.8	23198.9	636.3	448.2	1084.5	2776.6	3127.3	5903.9	1036.3	1540.6	2576.9	213.9	415.6	629.5	1344732	0.703749	1.07341	1489	1591	3080	841	1445	2286	4320	3496	7816	3046	3148.8	6194.8	2615	3693	6308	1501	1698	3199	5395	5910	11305	8548	10801	19349	7812
OAS30348	1	71.3938	1	28	18	R	10095.2	12040	22135.2	285.2	400.5	685.7	3977.9	4218.3	8196.2	1735.2	1577.6	3312.8	565.5	587.3	1152.8	1577661	0.751241	1.02381	1912	1839	3751	1114	1770	2884	5454	4864	10318	3188.1	3432.6	6620.7	2438	3000	5438	1601	1575	3176	10288	9267	19555	9086	11116	20202	6558
OAS30350	2	83.5048	2	28	12	R	14036.8	15089.5	29126.3	657.4	806.3	1463.7	3706.4	3238.9	6945.3	1275.6	1081	2356.6	146.3	174.5	320.8	1342841	0.666812	0.99426	1259	1657	2916	1875	1945	3820	5758	4509	10267	2642.9	2681.7	5324.6	2711	3143	5854	1364	1518	2882	6363	5961	12324	7807	10407	18214	9174
OAS30351	1	73.6627	2	28	12	R	18830.3	11891.8	30722.1	647	705.6	1352.6	3412.6	3321.2	6733.8	1346.5	1343.2	2689.7	312.9	394.1	707	1538173	0.779301	1.14902	1860	1985	3845	1830	1557	3387	5780	4975	10755	3564.8	3689.1	7253.9	2636	3175	5811	1762	2000	3762	8412	7852	16264	9989	14135	24124	9640
OAS30352	1	95.2749	2	27	8	R	24710.6	22456.7	47167.3	603.2	1120.3	1723.5	3050.1	3030.1	6080.2	814.6	1009.7	1824.3	259.5	284.5	544	1238310	0.609987	0.972643	1938	1580	3518	969	1764	2733	4269	3333	7602	2664.8	2983.7	5648.5	2207	2110	4317	1364	1345	2709	8094	7770	15864	8666	8690	17356	6248
OAS30359	1	56.3316	2	30	18	L	7049.7	6447.6	13497.3	220.4	501.3	721.7	4567	4516	9083	1818.9	1812.1	3631	617.5	637.6	1255.1	1756280	0.805517	1.16879	2280	2063	4343	2398	2120	4518	6554	6538	13092	3872.9	3833.8	7706.7	3529	4050	7579	1924	1915	3839	10256	8984	19240	12089	14092	26181	9998
OAS30360	1	58.5076	1	30	16	**	15160.7	10027.2	25187.9	819.5	634	1453.5	5046.8	5622.6	10669.4	2279.6	2357.2	4636.8	741.6	727.2	1468.8	1914899	0.740188	1.0447	3001	3133	6134	2343	1769	4112	5915	7635	13550	3730.3	4025.8	7756.1	3155	3730	6885	3028	2170	5198	12186	11271	23457	12133	16234	28367	11642
OAS30362	1	67.6789	2	27	16	R	24485	21831	46316	1249.2	1284	2533.2	3946.9	4100.7	8047.6	1639.2	1632.1	3271.3	381	557.8	938.8	1497584	0.689838	1.0361	1699	1867	3566	1721	1211	2932	4584	4813	9397	3970.5	3668.5	7639	2475	3156	5631	1643	1948	3591	6573	7126	13699	10149	12982	23131	8974
OAS30363	1	71.3416	2	29	16	R	16170.9	16239.2	32410.1	290.3	274.1	564.4	4331.8	4476.9	8808.7	1655.5	1761.4	3416.9	548.8	509.2	1058	1471233	0.764434	1.10211	1849	1905	3754	1464	1043	2507	4753	4654	9407	3210.2	3032	6242.2	3061	2442	5503	1575	2361	3936	9293	7803	17096	12033	14035	26068	11238
OAS30364	1	71.1454	1	29	16	R	25368.5	12871.1	38239.6	1543.5	842.2	2385.7	4074	4432.1	8506.1	1866.2	2031.4	3897.6	460.3	649.8	1110.1	1890361	0.711581	1.05081	2404	2234	4638	1201	1189	2390	5469	6382	11851	4273.1	4261	8534.1	3791	4293	8084	1952	2370	4322	9240	9565	18805	14755	14820	29575	11480
OAS30367	1	58.1127	2	30	20	L	8336.9	7854.3	16191.2	292	206.4	498.4	3655.8	3263.4	6919.2	1479.7	1412.4	2892.1	487.3	528.5	1015.8	1390670	0.751426	1.07169	2440	1455	3895	1327	1093	2420	3766	3650	7416	3015.5	3038.8	6054.3	1969	2060	4029	1355	1356	2711	7387	6700	14087	10243	10643	20886	8019
OAS30368	1	56.5855	1	30	18	R	9164.7	7903.3	17068	433.4	377.2	810.6	4497	4316.9	8813.9	1917.4	1939.2	3856.6	453.8	562.6	1016.4	1582196	0.774745	1.10479	1587	1610	3197	1124	2059	3183	6691	7360	14051	2924	3215.8	6139.8	2877	3587	6464	2315	2043	4358	8753	8664	17417	8859	12606	21465	13372
OAS30369	2	78.124	2	28	13	R	28981.9	29696	58677.9	647.5	516.8	1164.3	3399.9	3443.3	6843.2	1270.9	1241	2511.9	382	398.2	780.2	1509062	0.678009	0.983693	1364	1878	3242	852	1803	2655	4462	3536	7998	3862.7	3670.5	7533.2	2328	2424	4752	1938	2315	4253	7930	8175	16105	8125	9235	17360	7810
OAS30374	1	76.3232	2	26	15	L	17581.2	14753.6	32334.8	551.2	706.2	1257.4	3133	3354.1	6487.1	1550.1	1795.7	3345.8	409.1	334	743.1	1431114	0.73103	1.08187	1741	1644	3385	1976	1597	3573	5337	5202	10539	3497.3	3786.1	7283.4	2834	2966	5800	1728	1614	3342	6548	6922	13470	8840	10340	19180	9624
OAS30376	1	77.4777	2	29	17	R	10755.1	10990.7	21745.8	530.5	579.8	1110.3	3427.6	3508.8	6936.4	1372.6	1479.8	2852.4	302.7	328.3	631	1342936	0.713406	1.03538	1797	1925	3722	1960	1199	3159	4692	5014	9706	2636.3	2736.6	5372.9	2527	2660	5187	1577	1621	3198	7446	8226	15672	9554	10374	19928	8632
OAS30379	2	89.2477	1	27	16	R	27941.4	21061.2	49002.6	944	705.7	1649.7	3174.2	3748.4	6922.6	1066.2	1517.5	2583.7	353.3	420.6	773.9	1653153	0.65335	0.982279	1882	2207	4089	2577	1994	4571	5393	4981	10374	2999.4	2577.4	5576.8	3215	2700	5915	1080	2068	3148	10828	9488	20316	11320	15941	27261	7940
OAS30381	2	73.6054	1	30	18	R	24989.3	28254.5	53243.8	1128.7	1349.8	2478.5	4056.1	3575.2	7631.3	1880.9	1617	3497.9	378	500	878	1793955	0.702268	0.998724	2935	1641	4576	1681	1272	2953	7550	6721	14271	4520.6	5216.9	9737.5	3734	2671	6405	1296	1250	2546	8653	8850	17503	14541	13967	28508	11461
OAS30382	1	72.2816	1	29	18	R	14632.3	11753.6	26385.9	759.4	516.8	1276.2	3079.7	3842.3	6922	1297.6	1635.7	2933.3	638	504.9	1142.9	1508583	0.681781	1.07744	990	1619	2609	1826	2264	4090	5018	5316	10334	2637.1	2890.7	5527.8	2355	2552	4907	1439	1747	3186	9038	8424	17462	8026	10667	18693	10078
OAS30383	2	88.9221	1	30	16	R	23341.5	21854.3	45195.8	1414.5	1553.5	2968	3315	3103.4	6418.4	1165.4	1452.5	2617.9	392.1	425.3	817.4	1523723	0.650198	0.956712	1990	1753	3743	1408	1700	3108	5094	4762	9856	3712.3	3566.1	7278.4	2467	2928	5395	1910	1853	3763	7621	6766	14387	10615	13316	23931	9229
OAS30384	1	65.5299	1	30	16	R	6746.6	7092.6	13839.2	282.9	582.6	865.5	3870.7	4100.7	7971.4	1772.6	1558.7	3331.3	505.8	486.9	992.7	1558939	0.723873	1.00002	2112	1893	4005	1597	1490	3087	4441	5155	9596	3092.2	3172.9	6265.1	2756	3503	6259	1669	1815	3484	8986	7865	16851	10605	14598	25203	8934
OAS30385	2	73.631	2	27	17	R	24637.5	21154.7	45792.2	650.7	905	1555.7	2999.8	2687	5686.8	1375.2	1153	2528.2	222.8	394.1	616.9	1449633	0.650241	0.976159	1112	1801	2913	1535	1641	3176	2633	3132	5765	2950.2	3400.2	6350.4	3060	2922	5982	1452	1237	2689	7936	6756	14692	9517	8192	17709	8634
OAS30386	2	74.9827	1	30	18	R	24618.8	19451.5	44070.3	967.2	677.8	1645	3645.1	3881	7526.1	1571.4	1834.9	3406.3	286.3	477.5	763.8	1744173	0.711312	1.05073	2958	2824	5782	2621	2057	4678	6420	5689	12109	3196	3228.4	6424.4	3604	4282	7886	3168	2232	5400	10294	9623	19917	13499	16120	29619	13360
OAS30393	2	87.6209	2	28	13	R	13684.2	11200.1	24884.3	612.6	563.6	1176.2	3681.7	3753.9	7435.6	1265.9	1422.3	2688.2	398.2	550.1	948.3	1427166	0.688562	1.02072	2007	1933	3940	1161	1331	2492	3450	4075	7525	3338.2	3293	6631.2	2304	3220	5524	1487	1743	3230	7524	7892	15416	9691	10300	19991	9431
OAS30395	1	53.2856	2	30	18	R	9712.1	7281	16993.1	294.4	276.5	570.9	4684.8	4737.1	9421.9	1674.1	1994.9	3669	484.5	714.9	1199.4	1722609	0.796817	1.13954	2387	2380	4767	1793	2030	3823	7314	5995	13309	3267.3	3296.8	6564.1	2664	3831	6495	2456	2221	4677	9802	8914	18716	15247	17164	32411	11771
OAS30398	2	75.0416	1	30	18	R	11492.2	14522.7	26014.9	1089.1	645.7	1734.8	3058.7	3118.6	6177.3	1100.5	1342.8	2443.3	260.7	353.4	614.1	1445030	0.688357	1.00097	1977	2476	4453	1227	1308	2535	5333	5026	10359	3375.5	3396.1	6771.6	2177	2388	4565	883	1309	2192	7311	7558	14869	9489	14120	23609	7877
OAS30400	1	54.1544	1	30	18	R	10496	11633.2	22129.2	547.2	504.6	1051.8	4988.7	4795.1	9783.8	1476.1	1727.5	3203.6	567.8	530.6	1098.4	1660097	0.783583	1.06212	2163	2135	4298	2152	2131	4283	5297	4739	10036	3133.7	3429.9	6563.6	3222	3642	6864	2738	2332	5070	9704	9913	19617	12704	16985	29689	8708
OAS30402	1	67.8217	2	29	14	R	16977.3	17375.2	34352.5	535	385.6	920.6	2970.8	3139.5	6110.3	1155.3	1470.4	2625.7	441	487.2	928.2	1417871	0.686633	1.05252	1999	1459	3458	1508	1074	2582	5200	3162	8362	3903.8	4268.4	8172.2	2686	2646	5332	1373	1691	3064	7344	6762	14106	8961	11983	20944	8829
OAS30403	2	65.1657	2	26	6	R	12332.1	8775.6	21107.7	501.2	519.6	1020.8	3309.7	3407.5	6717.2	1524.4	1433.5	2957.9	450.4	445.3	895.7	1453723	0.726601	1.04199	2045	1626	3671	1262	1204	2466	4340	5749	10089	3001	3142.9	6143.9	3136	2957	6093	1415	1575	2990	8686	8060	16746	8631	11471	20102	10809
OAS30405	1	70.8294	2	29	16	R	11029.1	10583.7	21612.8	561.9	366.3	928.2	3658.2	3580.9	7239.1	1190.4	1447.5	2637.9	382.9	351.9	734.8	1302455	0.687345	0.997596	1728	1353	3081	1244	1348	2592	3663	3288	6951	3113.2	3394.6	6507.8	2426	2968	5394	1813	2034	3847	7159	7818	14977	7885	10181	18066	10310
OAS30406	1	75.9832	1	29	16	L	15158.1	8004.9	23163	789.8	516.2	1306	3383	3577.3	6960.3	1374.1	1577.4	2951.5	280	429.3	709.3	1403897	0.721375	1.01434	1647	1735	3382	1180	1468	2648	4099	4398	8497	3017.3	3132.1	6149.4	2201	3102	5303	1642	1885	3527	8192	7209	15401	10011	13492	23503	8452
OAS30411	1	48.0681	1	30	16	R	7491.3	9400.8	16892.1	117.2	155	272.2	4400.3	4199.4	8599.7	1537.3	1806	3343.3	568.4	693	1261.4	1612810	0.743604	1.02782	2428	1930	4358	1553	2277	3830	5234	6375	11609	3306.3	3453.9	6760.2	3514	3670	7184	1578	1333	2911	11474	9277	20751	12770	12652	25422	9909
OAS30413	1	64.4722	2	30	16	R	22587.5	19891.8	42479.3	431.7	455.5	887.2	3838.2	3871.1	7709.3	1415.8	1516.7	2932.5	513.4	594.2	1107.6	1721889	0.702342	0.963284	2265	2494	4759	1750	1558	3308	7706	7926	15632	3988.8	4106.6	8095.4	3635	3735	7370	1818	1679	3497	9070	9463	18533	10262	12188	22450	11422
OAS30414	1	73.2733	1	30	18	R	20875.1	19346.8	40221.9	671.2	945.2	1616.4	3862.8	4034.1	7896.9	1387.4	1439.4	2826.8	346.8	354.8	701.6	1626472	0.673434	1.02672	2048	1379	3427	2253	2010	4263	5984	4763	10747	2851.2	3108.7	5959.9	3352	2757	6109	2289	1889	4178	8189	8525	16714	7571	9922	17493	7995
OAS30417	1	69.9782	2	29	16	R	17809	19604.3	37413.3	528.3	540.3	1068.6	4393.2	4508.4	8901.6	1401.8	1549.6	2951.4	390.1	320.2	710.3	1522493	0.750223	1.09035	1634	1809	3443	1164	1076	2240	5294	2994	8288	3843.2	3841.2	7684.4	2299	2864	5163	1959	2115	4074	8525	9247	17772	9578	11082	20660	10207
OAS30420	2	95.7914	2	28	14	R	28172.4	26679.9	54852.3	1127.4	1166.1	2293.5	3821.5	3688.9	7510.4	1479.9	1565.4	3045.3	315.9	361.8	677.7	1485688	0.670211	0.953046	1833	1235	3068	1547	1084	2631	4346	4446	8792	4914.8	4198.3	9113.1	2262	2751	5013	1173	1231	2404	6302	7044	13346	9032	10660	19692	7126
OAS30422	1	76.5149	1	27	12	R	13756.5	11303.2	25059.7	391.2	445.7	836.9	3338.4	3382	6720.4	1501.8	1545.5	3047.3	295.7	394.1	689.8	1380566	0.674021	1.00709	1523	1341	2864	718	1834	2552	3414	3224	6638	2962.3	3113.1	6075.4	2496	2492	4988	2360	1995	4355	7978	8507	16485	7090	8007	15097	7372
OAS30423	2	85.0382	2	30	18	R	26457.3	21540.9	47998.2	778.3	559.6	1337.9	3198.4	3313.5	6511.9	1188	1273.2	2461.2	336.9	333.7	670.6	1460744	0.700142	0.979335	2330	1958	4288	1146	1814	2960	4846	5224	10070	2922.4	3466.4	6388.8	2323	2860	5183	1824	1813	3637	8749	8510	17259	8199	12690	20889	7806
OAS30429	1	48.2527	2	30	18	R	5742.4	4150.1	9892.5	155.6	171.5	327.1	4174.4	4334.9	8509.3	1962.3	1715.4	3677.7	535.1	558.1	1093.2	1580504	0.75111	1.05503	1788	2377	4165	1694	2130	3824	4482	4290	8772	3105.1	3156	6261.1	3194	3920	7114	1955	1995	3950	10172	10216	20388	13049	13546	26595	10220
OAS30430	1	73.3727	2	30	12	L	20474	14050.9	34524.9	936.6	584.5	1521.1	3248.3	3338.1	6586.4	1181	1197.6	2378.6	414.4	384.6	799	1374919	0.665952	0.994489	2246	1911	4157	1362	1462	2824	4387	4055	8442	2439.3	2554.9	4994.2	2396	2637	5033	1586	1929	3515	8634	7668	16302	9686	12004	21690	7788
OAS30431	1	67.1538	1	30	16	R	14870.6	15322	30192.6	393.8	531.2	925	4104.8	3951.5	8056.3	1408.4	1352.4	2760.8	480.3	501	981.3	1791501	0.726954	1.03802	1830	2371	4201	1959	1725	3684	6035	6585	12620	3692.1	3591.9	7284	3316	3714	7030	2384	1917	4301	10997	9557	20554	11650	12587	24237	11219
OAS30432	1	43.5177	2	29	16	R	4728.6	3774.1	8502.7	450.5	652.6	1103.1	3742.7	4081.5	7824.2	1553.9	1612.8	3166.7	581.4	623.2	1204.6	1418083	0.767266	1.10152	1856	2206	4062	2467	1699	4166	6138	5331	11469	3288.1	3517.2	6805.3	2975	2546	5521	1442	1448	2890	8613	9661	18274	9598	14005	23603	8564
OAS30434	2	76.0799	2	27	12	R	25671.1	20553.9	46225	574.7	282	856.7	3396.5	2484.6	5881.1	1065.5	540.5	1606	309.3	375.7	685	1536585	0.698239	1.03471	1903	1988	3891	1590	1886	3476	4682	4461	9143	3369.9	3255	6624.9	2170	2684	4854	1672	1930	3602	8263	7386	15649	9492	10620	20112	7543
OAS30435	1	75.7499	1	28	16	R	22106.7	20363.5	42470.2	592	716.9	1308.9	4030.5	4238.7	8269.2	1853.6	1676.5	3530.1	385.7	515.3	901	1845897	0.716491	1.09184	2118	1743	3861	2101	2528	4629	5859	5074	10933	3339.3	3448.3	6787.6	2990	3673	6663	1794	2708	4502	9424	8718	18142	10184	12308	22492	8472
OAS30438	1	73.5377	2	30	18	R	8328.4	7296.5	15624.9	474.2	493.6	967.8	3553.6	3575.9	7129.5	1443.8	1346.8	2790.6	358.5	485.6	844.1	1415869	0.750634	1.06225	1989	1789	3778	1184	1713	2897	5145	4942	10087	3540.4	3324.3	6864.7	2891	3555	6446	1388	1526	2914	7328	7813	15141	9486	13950	23436	8555
OAS30441	1	66.6472	1	29	16	R	10222.1	8057.4	18279.5	437.3	291	728.3	3485.2	4007.9	7493.1	1655.8	1591.1	3246.9	465.5	507.4	972.9	1485202	0.766478	1.05293	2191	2043	4234	1027	1612	2639	6222	4555	10777	3259.8	3257.3	6517.1	2881	3132	6013	1902	1997	3899	9209	8294	17503	10792	14181	24973	9841
OAS30442	2	66.7273	2	30	16	R	11423.8	11672.9	23096.7	391.4	443.1	834.5	3588.1	3090.3	6678.4	994.3	1220.7	2215	254.2	380.2	634.4	1520115	0.678241	1.01001	2558	2058	4616	1170	1953	3123	4089	4766	8855	3230.8	3401	6631.8	2741	3105	5846	1486	1654	3140	7346	7033	14379	11142	13617	24759	10304
OAS30449	1	72.03	1	30	18	R	22928.1	21367.4	44295.5	360.1	670.9	1031	4226	4543	8769	1500.1	1694.9	3195	515	504.8	1019.8	1685041	0.728851	1.04694	2035	1790	3825	2017	2623	4640	6898	7429	14327	3352.3	3385	6737.3	2858	3689	6547	2214	2650	4864	9712	10470	20182	13921	15371	29292	9030
OAS30450	1	72.2244	2	29	18	R	36385.7	39186.1	75571.8	986.8	610	1596.8	3380.8	3443	6823.8	1219.5	1405.9	2625.4	315.2	412.5	727.7	1430960	0.670718	1.01054	1744	1330	3074	1203	1566	2769	5384	5007	10391	3413.4	3749.9	7163.3	2679	3104	5783	1214	1093	2307	6618	6475	13093	8532	9199	17731	8442
OAS30452	2	50.5072	2	29	16	R	5452.7	5731.8	11184.5	352.9	235.5	588.4	3976.3	4018.4	7994.7	1577.4	1466.5	3043.9	637.6	721.9	1359.5	1393530	0.792068	1.07279	2156	1550	3706	2165	1228	3393	4701	5204	9905	3112.4	2920.6	6033	3493	2561	6054	1723	1851	3574	7403	6650	14053	13265	12852	26117	9898
OAS30458	1	63.9449	2	28	18	R	13808.6	11718.9	25527.5	901	632.8	1533.8	3274.5	3818.4	7092.9	1164.5	1595.1	2759.6	543.9	602.8	1146.7	1596342	0.780625	1.10206	2720	2335	5055	2618	1753	4371	4547	3636	8183	3495.9	3512.5	7008.4	3361	3210	6571	1553	1546	3099	8963	8428	17391	10433	15851	26284	9366
OAS30459	1	62.5966	2	29	16	R	4311.7	6535	10846.7	465	330	795	4316.9	4022.1	8339	1538.2	1693	3231.2	545.7	616.5	1162.2	1493486	0.789748	1.08756	1876	1464	3340	1542	1933	3475	4285	5266	9551	3135.1	3118.1	6253.2	4606	3290	7896	1553	1800	3353	8319	8951	17270	9386	12221	21607	8778
OAS30461	1	69.5098	1	28	14	R	20976.9	20286.2	41263.1	694.9	782	1476.9	4194.3	3984.3	8178.6	1814.9	1935.7	3750.6	428.5	464.9	893.4	1658364	0.684309	1.01101	2574	2058	4632	1370	2453	3823	6924	5502	12426	3476.4	3278.2	6754.6	2652	3252	5904	2635	2803	5438	9873	10285	20158	11055	14058	25113	10000
OAS30462	1	51.0555	1	29	14	R	7083.2	7345.7	14428.9	353.7	321.9	675.6	4496.5	4577.4	9073.9	1754.8	2064.9	3819.7	769.8	804.6	1574.4	1685999	0.72844	1.10009	2496	1862	4358	1196	1941	3137	6253	5294	11547	4608.9	4709.9	9318.8	3185	4043	7228	1670	1520	3190	9209	10123	19332	10292	11760	22052	10158
OAS30464	1	61.0238	2	30	12	R	11041.8	9128.9	20170.7	379.9	333.8	713.7	4191.3	4474	8665.3	1976.8	2080.6	4057.4	493.5	608.7	1102.2	1629583	0.733262	0.997556	2009	2164	4173	2235	1797	4032	5978	5538	11516	3565.7	3760.8	7326.5	2847	3163	6010	2858	2568	5426	8134	8755	16889	13106	12099	25205	12009
OAS30465	1	60.5221	1	30	18	R	24085.6	31552.6	55638.2	388.3	493.8	882.1	4187	4156.1	8343.1	1472.4	1607.9	3080.3	416.4	477.2	893.6	1774310	0.695957	1.00609	3084	2427	5511	1230	1222	2452	6739	7623	14362	2998.1	2936.9	5935	1873	2595	4468	1800	1817	3617	10002	9552	19554	11004	15304	26308	10391
OAS30468	1	74.8416	2	27	18	R	7423.6	5700.6	13124.2	239.7	246.2	485.9	3514.1	4015.5	7529.6	1692.6	1695.8	3388.4	518.8	570.9	1089.7	1492594	0.724821	1.04674	1688	1644	3332	952	940	1892	6064	4814	10878	3118.2	3498.5	6616.7	2573	3070	5643	1580	1598	3178	8252	8546	16798	8788	11307	20095	8497
OAS30469	1	75.211	2	29	18	R	15557.2	17137.8	32695	847.2	1087.6	1934.8	3171.6	3357.5	6529.1	1323.7	1578.8	2902.5	397.6	380.3	777.9	1369914	0.682783	1.02496	1721	1969	3690	1691	1262	2953	5258	4522	9780	2448	2641.5	5089.5	2443	2530	4973	1558	1399	2957	8039	7609	15648	9948	13074	23022	8628
OAS30471	2	81.3049	1	27	18	R	21367.5	16317.8	37685.3	828.5	805	1633.5	3702.6	4218	7920.6	1474.3	1387.6	2861.9	381.1	503	884.1	1764485	0.684018	1.04134	3227	2003	5230	1824	1972	3796	6310	5024	11334	3265.7	3171.5	6437.2	3338	3670	7008	1941	2184	4125	12757	11566	24323	15603	16337	31940	10990
OAS30473	2	72.3993	1	30	16	R	14964.5	9653	24617.5	787.1	910.6	1697.7	4386.4	4038.4	8424.8	1662.6	1345.6	3008.2	413.8	589.8	1003.6	1881977	0.691052	1.06435	2130	2229	4359	2217	2162	4379	5281	7862	13143	3509.8	3627.2	7137	3545	4100	7645	4060	2677	6737	10109	10344	20453	15557	15255	30812	12175
OAS30475	2	73.0322	2	30	19	R	31296.1	29904.7	61200.8	1111.4	871.3	1982.7	2830.8	2973.6	5804.4	1437.8	1492.1	2929.9	469.6	459.6	929.2	1478964	0.719077	1.01816	1955	1857	3812	1456	1790	3246	5531	4754	10285	4131.5	4268.2	8399.7	2126	2770	4896	1331	1702	3033	6909	7521	14430	9677	11859	21536	7799
OAS30476	1	71.6999	2	28	14	R	8713.8	8252.1	16965.9	338.8	337.7	676.5	3713.2	3831.1	7544.3	1531.8	1665.6	3197.4	493.6	492.6	986.2	1524498	0.71312	1.00517	2636	2143	4779	2328	2031	4359	6377	5335	11712	3470.1	3496.1	6966.2	2474	2687	5161	2092	2083	4175	8504	9522	18026	10687	14462	25149	12479
OAS30478	2	78.5416	1	27	18	R	17717.2	16045.3	33762.5	1005.6	937.3	1942.9	3704	3768.7	7472.7	1468.9	1368.2	2837.1	421.1	372.5	793.6	1639128	0.687481	1.00486	2672	1795	4467	1983	1528	3511	6175	5606	11781	3660	3226.7	6886.7	3593	4233	7826	2055	1723	3778	9759	8919	18678	9457	11515	20972	10102
OAS30480	2	76.1842	2	30	12	R	47572.3	40906.9	88479.2	1588.8	1700.9	3289.7	2845.8	2613.3	5459.1	956.2	880.2	1836.4	346.1	357	703.1	1581623	0.622845	0.974956	1828	2331	4159	2242	1850	4092	3695	3934	7629	3169.1	2763.5	5932.6	2509	2410	4919	1169	1017	2186	8080	7738	15818	8058	10516	18574	9224
OAS30482	1	54.8887	2	30	23	R	4184.8	4673.7	8858.5	95.5	138.3	233.8	3590.5	3632.2	7222.7	1143.5	1531.2	2674.7	382.3	421.1	803.4	1537690	0.735595	1.06905	2162	2164	4326	1633	1738	3371	5189	5119	10308	2681.3	2753.9	5435.2	2645	3019	5664	2336	1473	3809	9012	8928	17940	12225	12121	24346	10112
OAS30483	1	55.4367	2	30	16	R	5458.2	4796.3	10254.5	231.9	246.8	478.7	3768.8	3809.4	7578.2	1250.1	1544.6	2794.7	513.2	519.2	1032.4	1439012	0.774224	1.13149	1878	1676	3554	1376	1917	3293	4667	4742	9409	3520.6	3416.6	6937.2	2129	2889	5018	1778	2007	3785	7520	7454	14974	8664	10808	19472	8653
OAS30484	1	61.2911	2	29	12	R	8994.3	8235.3	17229.6	335.9	268.3	604.2	3437.1	3597.7	7034.8	1377.6	1342.8	2720.4	343.4	472.6	816	1497101	0.748571	1.10279	2013	1455	3468	1935	1903	3838	6336	6227	12563	2907.5	2960.9	5868.4	2584	2952	5536	2232	2235	4467	8669	9836	18505	8672	11248	19920	8859
OAS30485	1	73.3632	2	30	15	R	41910.2	32478.1	74388.3	1238.8	717.9	1956.7	3075.4	3797.2	6872.6	1478.8	1559.1	3037.9	303.5	343.7	647.2	1378469	0.705566	0.96102	2113	2211	4324	1635	1430	3065	5066	5135	10201	2576.7	2587.5	5164.2	1914	2660	4574	1484	1450	2934	8607	8964	17571	10462	13285	23747	9380
OAS30486	1	54.8882	1	30	16	R	9270.1	8244.3	17514.4	453.6	355	808.6	4266.8	4391	8657.8	1559.2	1712	3271.2	639.3	611.9	1251.2	1764444	0.750288	1.06536	2719	2353	5072	1638	2786	4424	9204	5382	14586	3800.3	4019.5	7819.8	4187	3863	8050	2198	2480	4678	9009	9092	18101	13210	17931	31141	12467
OAS30487	1	72.4177	2	30	17	R	16008.7	14062.7	30071.4	601.8	544.8	1146.6	3923.9	4134.2	8058.1	1585.1	1699.3	3284.4	474.4	476.3	950.7	1628980	0.747388	1.04732	1983	1802	3785	1226	1477	2703	7670	5552	13222	2821.2	2907.8	5729	3007	3644	6651	1832	1790	3622	9666	8954	18620	12941	14394	27335	9086
OAS30489	1	70.4333	1	30	16	R	17874.8	19719.2	37594	608.8	865.2	1474	3412	3133.5	6545.5	1188.2	1406.8	2595	446	452.6	898.6	1813045	0.71449	1.02175	2370	2269	4639	2155	1666	3821	6994	6189	13183	3290	3627.7	6917.7	3237	3534	6771	3009	2825	5834	8923	9221	18144	11965	16625	28590	11196
OAS30491	1	78.1955	2	30	18	R	15112.2	13852.3	28964.5	808.3	686.5	1494.8	3277.2	3533.2	6810.4	1243.2	1434.4	2677.6	432.6	496.8	929.4	1394801	0.715972	1.00878	1489	1636	3125	2641	2197	4838	5026	4976	10002	3752.2	3643.6	7395.8	2563	3259	5822	1891	1343	3234	7909	8507	16416	9560	13390	22950	7819
OAS30492	1	57.5999	1	30	16	R	8443.6	8407.6	16851.2	365.7	397.5	763.2	4106.3	4010.3	8116.6	1797.1	1847.5	3644.6	596.1	678	1274.1	1594041	0.728352	1.03758	2233	2484	4717	1468	1721	3189	6544	5782	12326	3545.1	3560	7105.1	2757	3371	6128	2572	2654	5226	11428	9828	21256	11005	12454	23459	9936
OAS30493	2	93.2182	2	27	17	R	22178.4	25312.7	47491.1	1702.9	1676.7	3379.6	2624.8	2489.1	5113.9	937.2	873.9	1811.1	272	304.6	576.6	1280029	0.620696	0.943996	1072	1377	2449	1224	1547	2771	3875	3733	7608	3153.4	3080.2	6233.6	2458	2933	5391	1056	694	1750	5557	5456	11013	7978	9572	17550	6252
OAS30496	1	62.0105	1	30	16	R	15359.8	16414.9	31774.7	293.4	262.3	555.7	4336.7	4627.3	8964	2024	2204.4	4228.4	520.7	528.7	1049.4	1780465	0.694089	1.02459	2646	2420	5066	3035	2311	5346	4415	4397	8812	3076.8	3146.1	6222.9	2361	3633	5994	1964	2004	3968	10790	10395	21185	14200	13864	28064	13092
OAS30497	1	65.4055	2	29	17	L	4339.1	3500.9	7840	284.3	222.7	507	3558.4	3610.8	7169.2	1273.5	1740.2	3013.7	474.5	536.9	1011.4	1386412	0.742838	1.0252	2731	2373	5104	1307	1623	2930	5534	4686	10220	3045.7	3035.7	6081.4	2591	2786	5377	1813	1778	3591	9025	8760	17785	10999	13501	24500	8855
OAS30499	1	57.316	2	29	11	R	9449.4	10039.3	19488.7	295.8	405	700.8	3596.5	3733.5	7330	1542.2	1482.9	3025.1	414.4	401.9	816.3	1515421	0.672447	1.01513	1683	1820	3503	2004	1684	3688	6311	5779	12090	3154.8	3273.4	6428.2	3433	3629	7062	1623	1773	3396	7869	8178	16047	9763	11032	20795	7870
OAS30500	1	70.8582	1	28	16	R	20173.3	20664.9	40838.2	963	816.7	1779.7	3173.7	3781.4	6955.1	1387	1660.9	3047.9	441.4	438.8	880.2	1725311	0.72159	0.985174	2265	2185	4450	1592	1372	2964	6486	6510	12996	2810.9	3195.4	6006.3	3126	3149	6275	1599	1897	3496	10357	9532	19889	12261	16127	28388	9939
OAS30503	1	72.47	1	29	13	R	32310.5	18735.7	51046.2	1030.4	1153.7	2184.1	3496.3	4233.8	7730.1	1325.4	1548.9	2874.3	389.8	506.5	896.3	1564489	0.663763	0.970879	2593	1766	4359	1453	1826	3279	4789	4298	9087	3192.4	2905.3	6097.7	2759	3306	6065	1506	1501	3007	8350	7716	16066	10777	13504	24281	11248
OAS30508	1	69.8566	2	29	13	R	10393.6	11325.5	21719.1	391	479.5	870.5	3946.9	4016.1	7963	1656.1	1619.6	3275.7	438.6	461.6	900.2	1517550	0.704999	1.01436	2088	1746	3834	2157	1909	4066	6200	5268	11468	3258.1	3184.1	6442.2	3380	3775	7155	1541	1370	2911	8836	9255	18091	10167	9990	20157	9474
OAS30509	1	64.9948	2	30	18	R	6230.5	6239.6	12470.1	298.5	333.9	632.4	3804.8	3862.8	7667.6	1688.4	1817.6	3506	462.9	459.4	922.3	1460314	0.823407	1.21062	2028	2040	4068	1068	2245	3313	5638	5042	10680	3254.5	3278.2	6532.7	2799	3351	6150	1616	1812	3428	9697	8705	18402	9851	12215	22066	9077
OAS30513	1	68.8504	2	30	20	R	7243.3	6199.1	13442.4	306.3	404.6	710.9	3406.7	3849.5	7256.2	1399.2	1679.2	3078.4	503.3	546	1049.3	1476639	0.732205	1.04011	2770	2065	4835	2049	1967	4016	6474	6312	12786	3701.3	3853.2	7554.5	2115	2753	4868	1246	1084	2330	8104	8144	16248	11258	13015	24273	7966
OAS30514	1	64.5283	2	29	18	R	4139.9	3863.5	8003.4	183.4	270.6	454	3593.4	3687.5	7280.9	1317.6	1249.9	2567.5	479.7	475.1	954.8	1298649	0.771394	1.13526	1887	1442	3329	1412	1470	2882	4707	4207	8914	2482.2	2520.6	5002.8	2554	2825	5379	1289	1494	2783	7588	7276	14864	9445	11834	21279	7510
OAS30517	1	74.1699	1	29	16	R	16112.8	22048.5	38161.3	702.8	619.6	1322.4	3361.9	3497.1	6859	1277.3	1486.2	2763.5	370.1	401	771.1	1501260	0.685878	1.01113	2188	2031	4219	1286	1681	2967	5502	3285	8787	2898.4	3091.8	5990.2	2466	2967	5433	1773	2102	3875	7780	8114	15894	11183	12888	24071	8617
OAS30523	1	51.775	2	30	16	R	8615.2	8202.9	16818.1	214.4	489.4	703.8	4131.8	4213	8344.8	1812.9	1582.8	3395.7	499.3	508.7	1008	1467726	0.867739	1.24987	1976	2006	3982	1090	1682	2772	4904	4628	9532	3410.5	3299.2	6709.7	2127	2563	4690	1688	1719	3407	7172	7037	14209	11108	12565	23673	11319
OAS30524	1	70.0698	2	29	18	R	13699.6	12623.8	26323.4	413.9	408.1	822	3614	3866.2	7480.2	1655.2	1345.4	3000.6	376.2	458.5	834.7	1443511	0.729787	1.05021	2238	2063	4301	1442	1052	2494	4240	5523	9763	3504.6	3471.4	6976	3045	3764	6809	1322	1593	2915	7996	7908	15904	11455	12407	23862	9483
OAS30529	1	71.1149	2	30	14	L	9800.2	8311.4	18111.6	537.6	336.1	873.7	3640.9	3915.9	7556.8	1378.7	1495.9	2874.6	451.6	432.7	884.3	1473895	0.79861	1.19582	1839	2310	4149	1999	1289	3288	6111	5306	11417	3698.3	3562.4	7260.7	3494	3497	6991	1579	1591	3170	7899	7747	15646	9165	12424	21589	8659
OAS30531	1	52.4299	2	30	18	R	7852.5	8622.6	16475.1	293.1	268.8	561.9	3750	3803.7	7553.7	1466.4	1499.5	2965.9	493.5	549.5	1043	1499283	0.823999	1.21818	2109	1903	4012	1845	1811	3656	5406	5363	10769	3207.2	3280.5	6487.7	2940	2932	5872	1367	1335	2702	9089	9460	18549	11598	13259	24857	9575
OAS30535	1	52.656	2	28	15	R	10776.8	7454.8	18231.6	818.1	355.6	1173.7	3083.3	3525.9	6609.2	1259.7	1373.5	2633.2	461.8	521.1	982.9	1414407	0.811492	1.22023	1929	2084	4013	1399	1318	2717	5143	4301	9444	3132.1	3231.2	6363.3	2113	2252	4365	1578	1822	3400	9557	8051	17608	9848	14568	24416	9265
OAS30537	1	65.8405	2	30	16	R	4340.3	4059.2	8399.5	243	230.3	473.3	4170.5	4550.1	8720.6	1457.6	1834.3	3291.9	557.9	646.3	1204.2	1592734	0.795944	1.1434	2342	2105	4447	2516	1588	4104	6041	5896	11937	3321.7	3543.5	6865.2	2138	3719	5857	1836	2015	3851	10965	8890	19855	12406	12770	25176	10233
OAS30538	1	71.3915	2	29	18	R	9935.6	8850.7	18786.3	398.2	226.4	624.6	4609.6	4558	9167.6	1820.2	1893	3713.2	555.4	672.5	1227.9	1587959	0.744294	1.02957	2806	1908	4714	2372	1808	4180	7288	7083	14371	3448.1	3686.6	7134.7	3010	3547	6557	1675	1495	3170	8555	9362	17917	13109	14283	27392	8774
OAS30540	1	70.4532	1	26	15	R	12246.2	14921.9	27168.1	218.7	315.3	534	3913.9	4122.7	8036.6	1399.9	1789.9	3189.8	390.7	396.4	787.1	1650710	0.705504	1.03752	1886	1903	3789	1328	1997	3325	5215	5606	10821	3080.4	3100.1	6180.5	3174	3474	6648	1661	1499	3160	8809	8420	17229	10444	11281	21725	10638
OAS30543	1	86.2037	1	27	18	R	23159.5	23682.2	46841.7	1668.2	1714.4	3382.6	3954.3	4005.5	7959.8	1342.2	1614.3	2956.5	230.4	339.6	570	1595596	0.699586	0.995655	1719	1814	3533	1521	2403	3924	4846	4462	9308	3738.4	3570	7308.4	2935	3621	6556	2633	1708	4341	8116	9528	17644	9718	12022	21740	9526
OAS30550	1	66.3944	1	28	18	R	15575.6	20884.9	36460.5	553	834.3	1387.3	4233.2	4042.6	8275.8	1571.3	1512.6	3083.9	551.9	518.6	1070.5	1670522	0.698977	1.00564	2274	2057	4331	1685	1612	3297	5849	5790	11639	3314.7	3543	6857.7	2563	3248	5811	1778	2041	3819	9866	9411	19277	10187	14031	24218	10480
OAS30551	1	64.9988	2	29	12	R	14268.1	17900.4	32168.5	332.8	317.7	650.5	3580.6	3431.5	7012.1	1446.1	1290.8	2736.9	537.7	619.6	1157.3	1486598	0.782533	1.11604	2163	1806	3969	1542	1736	3278	5142	5548	10690	2882	3136.5	6018.5	2731	2492	5223	1883	1769	3652	7780	8897	16677	10214	13416	23630	9645
OAS30552	1	73.476	1	28	18	R	28538.1	23122.2	51660.3	757.6	610.1	1367.7	3856.1	4171	8027.1	1330	1641.8	2971.8	428	512	940	1946633	0.675074	1.06676	3006	2333	5339	2473	2846	5319	6533	5766	12299	4155.2	3655.2	7810.4	3329	3247	6576	1946	2227	4173	10357	10781	21138	10973	15904	26877	11612
OAS30560	2	70.9003	1	30	16	R	21710.1	17623.5	39333.6	1290	804.6	2094.6	3140	3488.7	6628.7	1027.2	1524.5	2551.7	369.2	491.4	860.6	1644135	0.676785	1.01586	2186	1706	3892	1338	1731	3069	6889	7101	13990	3020.4	3328.1	6348.5	3630	4108	7738	1613	2087	3700	9708	8549	18257	10416	11368	21784	9879
OAS30561	1	70.1443	2	28	18	R	9459.7	11189.2	20648.9	471	468.8	939.8	4112	4058.9	8170.9	1701.8	1762.6	3464.4	443.4	497	940.4	1580231	0.712981	1.05738	1796	1818	3614	1254	2336	3590	4278	4063	8341	3625.2	3061.9	6687.1	2852	2916	5768	1443	2014	3457	8982	8828	17810	10103	12052	22155	10960
OAS30562	1	61.5033	2	29	16	R	7677.9	5808.2	13486.1	188.3	211.9	400.2	3611.9	3594.7	7206.6	1422.8	1447.1	2869.9	487.6	568.2	1055.8	1364569	0.858373	1.27277	1448	1324	2772	1096	2065	3161	5684	5098	10782	3241.9	3213.4	6455.3	2020	2080	4100	1216	1009	2225	7290	6882	14172	7937	9573	17510	6808
OAS30566	1	71.206	1	29	12	R	17557	23583.5	41140.5	598.8	691.4	1290.2	4320.6	3946.2	8266.8	1502	1813	3315	549.7	526.4	1076.1	1751851	0.670259	1.03565	1692	1568	3260	1197	1349	2546	5458	6513	11971	3459.7	3410.2	6869.9	2105	2604	4709	2371	2403	4774	7247	8899	16146	9654	10600	20254	9042
OAS30567	1	74.8011	2	30	18	R	12625.5	11571.8	24197.3	540.5	451.4	991.9	3381.4	3695.9	7077.3	1297.6	1324.6	2622.2	331	411.9	742.9	1425024	0.731474	1.07692	1686	1631	3317	694	1703	2397	4819	4589	9408	3384.3	3212.5	6596.8	2840	2750	5590	1469	1422	2891	8417	8268	16685	9365	9721	19086	8316
OAS30568	1	55.1927	2	28	18	R	9831.2	10249.7	20080.9	298.7	430.4	729.1	4212.1	4277.6	8489.7	1571	1553.7	3124.7	508.4	452.1	960.5	1473388	0.848766	1.2134	2266	2102	4368	1481	1468	2949	4622	4206	8828	2797.5	2903.3	5700.8	1988	2826	4814	1737	1488	3225	8323	8366	16689	10808	12472	23280	8785
OAS30570	1	66.4849	1	28	14	R	26034.8	17850	43884.8	1031.7	819.6	1851.3	3707.3	3631.5	7338.8	1472.6	1489.4	2962	270.1	418	688.1	1600732	0.661435	0.953051	1819	2021	3840	1348	1737	3085	5653	6163	11816	3835.1	3633.5	7468.6	2905	3001	5906	1774	1879	3653	10878	9833	20711	10348	12831	23179	9962
OAS30571	1	54.7632	2	29	20	R	4609.1	3184.4	7793.5	281.6	268.2	549.8	3390.7	3725.4	7116.1	1314.5	1464.9	2779.4	499.6	501.5	1001.1	1369711	0.884898	1.27835	2051	1942	3993	1716	1295	3011	5545	4554	10099	2810.8	2746.2	5557	2739	2862	5601	2197	1907	4104	8495	7205	15700	9415	13438	22853	8154
OAS30579	1	57.691	2	30	18	R	4261.6	4150.6	8412.2	304.7	247.3	552	3588.9	3705.2	7294.1	1478.3	1604.4	3082.7	405.9	440.2	846.1	1318777	0.844589	1.24082	1815	1913	3728	1357	1926	3283	4142	5740	9882	2811.5	2890.7	5702.2	2357	2910	5267	1531	1615	3146	8363	7834	16197	10179	9772	19951	9199
OAS30580	1	67.8489	1	29	16	R	11725.9	9743	21468.9	923	1192.1	2115.1	3723.7	3799.4	7523.1	1573.5	1412.2	2985.7	374.6	441.9	816.5	1655226	0.714813	1.10642	1905	1784	3689	1116	1678	2794	4555	5141	9696	3857.3	4370.8	8228.1	3115	3337	6452	1568	1443	3011	8887	8218	17105	9437	12439	21876	8108
OAS30584	1	74.1966	1	29	16	R	11640.3	11887.2	23527.5	683.3	444	1127.3	4230.9	4577.3	8808.2	1628.1	1767	3395.1	576.3	637.3	1213.6	1721088	0.746635	1.11375	2250	2107	4357	1810	2186	3996	6459	6215	12674	3083.9	3077.2	6161.1	3831	4515	8346	2425	3035	5460	9731	9461	19192	10478	17306	27784	12172
OAS30585	2	80.6405	1	29	19	R	19656.8	16888.4	36545.2	988.9	1013	2001.9	3675.7	3614.6	7290.3	1149.3	1532.7	2682	317.5	412.1	729.6	1621621	0.654073	0.995084	2245	1826	4071	1334	2033	3367	6016	5480	11496	3766.1	3836.8	7602.9	2335	2810	5145	1878	2079	3957	6987	7675	14662	9313	11746	21059	9260
OAS30586	1	56.4044	1	28	16	R	15044	14491.1	29535.1	771.5	1478.5	2250	4049.8	3746.1	7795.9	1444.7	1459.1	2903.8	573.7	549.5	1123.2	1702354	0.662726	1.00514	1929	1631	3560	1758	1967	3725	6344	4515	10859	3832.8	3805.4	7638.2	2801	3158	5959	1792	2715	4507	10567	9234	19801	11174	12973	24147	9999
OAS30589	2	83.3903	2	29	18	R	34533	21915.1	56448.1	1333.3	798.3	2131.6	2489.3	2788.5	5277.8	934.8	1182.8	2117.6	233.2	280	513.2	1216478	0.633631	0.922592	1634	1359	2993	1499	1455	2954	4304	4059	8363	3045.2	3020.8	6066	2194	2194	4388	1043	1491	2534	7137	6568	13705	8564	8082	16646	6460
OAS30590	1	58.756	1	30	18	R	9166.5	7643.2	16809.7	603.7	561	1164.7	4817.6	4972.6	9790.2	1821.6	1959.3	3780.9	519.2	685.5	1204.7	1677701	0.722179	1.01082	2967	2316	5283	1773	2192	3965	4975	4848	9823	3441.3	3435.2	6876.5	2776	3089	5865	2173	2188	4361	10814	9455	20269	11297	16192	27489	12538
OAS30592	1	80.4516	1	29	18	R	27842.4	39809.7	67652.1	1267.5	1881.7	3149.2	3546.6	4082.3	7628.9	1619.8	1995.3	3615.1	409.2	557.8	967	1784580	0.688857	0.992199	2527	2259	4786	2226	2564	4790	5698	5511	11209	3546.9	3576.6	7123.5	2896	3399	6295	2364	1744	4108	7696	9570	17266	11304	15163	26467	12410
OAS30594	1	62.5533	2	30	18	R	11636.8	11934.2	23571	358	652	1010	4044.5	4071.2	8115.7	1582.2	1928.6	3510.8	532.4	548.3	1080.7	1581454	0.731492	1.03183	2349	2098	4447	2653	1454	4107	5666	5381	11047	3494.5	3214.1	6708.6	2783	3521	6304	2004	1620	3624	10155	9073	19228	12164	14345	26509	12152
OAS30595	1	67.1732	2	30	18	R	12462.7	12370.1	24832.8	218.8	272.9	491.7	3182	3308.7	6490.7	1668.6	1578.7	3247.3	424.6	394	818.6	1303261	0.760056	1.05272	1612	1688	3300	1542	1850	3392	5913	4957	10870	2906.9	2930.4	5837.3	2299	2837	5136	1629	3086	4715	7475	7173	14648	9634	11348	20982	8544
OAS30601	1	67.8582	1	30	12	R	10556.6	7959.5	18516.1	418.6	473.7	892.3	4093	4254.9	8347.9	1616	1878	3494	546.2	558.7	1104.9	1696670	0.743135	1.06251	2313	2255	4568	1480	1435	2915	5467	5286	10753	3332.4	3481.7	6814.1	3538	3689	7227	1887	1783	3670	9155	9599	18754	10723	14028	24751	11756
OAS30607	1	87.0249	2	29	15	R	42302.7	34946.5	77249.2	1882	843.8	2725.8	3474.7	3630.8	7105.5	1318.6	1333.7	2652.3	222.5	398.1	620.6	1539398	0.716693	1.07032	1550	1835	3385	1535	1562	3097	5046	5386	10432	3134.6	3796.3	6930.9	2650	2558	5208	1631	1975	3606	8007	7250	15257	9696	12372	22068	10389
OAS30614	2	81.5246	2	28	12	R	32513.1	26370.7	58883.8	1202.8	997.4	2200.2	3371.4	3458.7	6830.1	1196	1362.1	2558.1	264	286.4	550.4	1347578	0.6517	0.955984	1533	1327	2860	1493	1055	2548	4546	3989	8535	3000	3005.9	6005.9	2120	2855	4975	1451	1372	2823	8551	8017	16568	8653	10436	19089	7259
OAS30615	1	68.1603	1	29	12	R	8839.4	8036.8	16876.2	433.2	434	867.2	3772.4	4011.1	7783.5	1681.5	1817.1	3498.6	340.5	438.1	778.6	1648430	0.71604	1.01971	3064	2254	5318	1908	2619	4527	5033	4820	9853	3156.5	3310.1	6466.6	2430	2886	5316	2351	2715	5066	8763	8725	17488	15154	13781	28935	11017
OAS30623	1	72.7099	2	30	12	R	14601.1	12843.8	27444.9	919.9	853.5	1773.4	3385.3	3618.2	7003.5	983.3	1260.6	2243.9	460.7	414.1	874.8	1546036	0.679199	1.0369	1646	1521	3167	1914	1130	3044	4985	4171	9156	3599.8	3613.3	7213.1	3669	4386	8055	1433	1902	3335	7650	7801	15451	7974	11498	19472	7613
OAS30624	1	68.9372	2	30	16	R	10028.4	6745.2	16773.6	345.1	328.5	673.6	3440	3705.5	7145.5	1328.4	1316	2644.4	414.4	476.4	890.8	1363014	0.723403	1.00727	2138	2145	4283	1453	1782	3235	5556	4974	10530	2759.3	2832.4	5591.7	2595	3310	5905	1515	1891	3406	7957	8543	16500	10644	11911	22555	7308
OAS30625	1	68.2016	1	29	20	R	9087	7549.7	16636.7	561	669.4	1230.4	4032.3	4314.3	8346.6	2020	2176.6	4196.6	505.5	589.1	1094.6	1794863	0.727769	1.05779	2798	1964	4762	1808	1704	3512	7500	7407	14907	3640.2	3943.7	7583.9	2684	2764	5448	2080	2427	4507	7259	8706	15965	11188	13437	24625	12450
OAS30631	1	60.45	1	30	16	R	10242.1	9170.5	19412.6	249.5	375	624.5	3982.9	4043.3	8026.2	1654.6	1832.5	3487.1	602.1	595.7	1197.8	1665545	0.732866	0.983404	2884	2537	5421	1840	2457	4297	5809	6725	12534	3791.8	4147.8	7939.6	3248	3784	7032	1962	1906	3868	11034	10594	21628	14187	20380	34567	10721
OAS30632	1	57.6843	1	27	16	R	17234.8	15397.5	32632.3	226	455.1	681.1	4062.2	3873	7935.2	2009.5	2129.5	4139	668	770.3	1438.3	1705395	0.731344	1.03044	3142	2345	5487	1581	2567	4148	5145	4660	9805	3697.3	3788.1	7485.4	2570	3219	5789	1811	1580	3391	9948	9435	19383	12308	15176	27484	11278
OAS30633	1	55.1582	2	29	18	R	8882.4	6833.1	15715.5	512.4	295.3	807.7	4537.4	5014.3	9551.7	1846.1	1786	3632.1	654.9	583.2	1238.1	1639560	0.748219	1.03906	2240	2353	4593	1576	1355	2931	5946	5730	11676	3708.9	3908	7616.9	2629	2672	5301	3044	1699	4743	9625	9454	19079	13819	17668	31487	13247
OAS30634	1	86.4133	2	27	18	R	18799.5	14620.3	33419.8	968.3	691	1659.3	2725.7	3086.8	5812.5	1116.1	1559	2675.1	285.7	388.5	674.2	1415399	0.667775	1.00962	1579	1801	3380	1931	1495	3426	3948	4285	8233	3499	3631.3	7130.3	3138	2735	5873	1586	1702	3288	6939	6466	13405	8260	10641	18901	8303
OAS30635	1	69.0511	2	29	17	L	4898.8	4778.4	9677.2	387.1	369.5	756.6	4245.7	4312.3	8558	1717.5	1756.8	3474.3	536.1	613.9	1150	1607409	0.761349	1.08885	1834	2360	4194	1649	1966	3615	5507	6129	11636	3299	3401.6	6700.6	2970	3272	6242	2185	2040	4225	11154	9798	20952	11061	14461	25522	10026
OAS30636	1	58.4655	2	30	16	R	6491.9	8183.2	14675.1	197.7	262.3	460	3901.4	3917.6	7819	1498.2	1470.8	2969	511.3	494.4	1005.7	1476614	0.735681	1.03328	2250	2276	4526	1130	1631	2761	5687	5016	10703	2859.2	3061.9	5921.1	2535	2933	5468	1976	1768	3744	9154	9133	18287	10610	13715	24325	10350
OAS30637	1	73.4394	1	30	20	R	25010.5	22317.9	47328.4	1194.1	1159.2	2353.3	3653.4	3789.5	7442.9	1706.7	1604.8	3311.5	319.6	305.1	624.7	1610926	0.709918	1.01478	1907	1770	3677	1336	1590	2926	6424	5211	11635	3866	3877.2	7743.2	3071	3800	6871	1607	1867	3474	7744	8890	16634	9365	9979	19344	8173
OAS30638	1	42.6971	1	30	20	R	12142.8	10264.7	22407.5	149.9	359	508.9	4318.9	4519.2	8838.1	1589.7	1861.9	3451.6	603.4	597.7	1201.1	1694200	0.758156	1.03456	2251	2161	4412	1451	1510	2961	7319	5841	13160	3685.8	3681.8	7367.6	3036	3732	6768	2227	1975	4202	9507	8296	17803	14337	16011	30348	10778
OAS30642	1	60.2876	2	30	14	R	10347.9	9794.4	20142.3	192.7	305.4	498.1	3496.7	3454.5	6951.2	1255.2	1358.6	2613.8	460.6	498.5	959.1	1418518	0.79035	1.19753	1702	1459	3161	1102	1676	2778	5164	4670	9834	3062.6	3147.8	6210.4	2739	2891	5630	1642	1759	3401	6646	7244	13890	9495	10803	20298	9707
OAS30644	1	69.5076	2	29	12	R	13727.3	14571.4	28298.7	361.8	353.9	715.7	3681.6	3911.8	7593.4	1800.3	1617.4	3417.7	492.4	487	979.4	1461457	0.763016	1.10098	1986	2069	4055	846	1789	2635	6568	5135	11703	3003.9	2924.6	5928.5	2533	2774	5307	1455	1885	3340	8457	8992	17449	10198	12779	22977	9268
OAS30657	1	72.9699	2	30	14	R	5129	4887	10016	400.9	113.2	514.1	3853.5	4091.9	7945.4	1335.5	1383.5	2719	461.4	535.9	997.3	1456446	0.756566	1.07625	2565	2016	4581	1182	1954	3136	4886	5362	10248	2923.2	3074.8	5998	2012	2726	4738	2097	2010	4107	9679	8226	17905	12557	13169	25726	9227
OAS30660	1	57.9816	2	30	19	R	6946.3	7126.5	14072.8	221.2	187.2	408.4	3726.5	3825.6	7552.1	1351.1	1482.7	2833.8	448.4	449.8	898.2	1365990	0.782801	1.06949	2325	1810	4135	1278	1290	2568	4455	5766	10221	3277.7	3309.6	6587.3	2970	2395	5365	1610	1239	2849	7719	7283	15002	10547	9799	20346	9534
OAS30662	2	87.4438	2	28	16	R	56227.2	49907.7	106135	3266.5	2348.4	5614.9	2390.7	2572.9	4963.6	766.8	849.8	1616.6	209	226.3	435.3	1388502	0.592694	0.892919	1264	1536	2800	587	1471	2058	4571	3444	8015	2599	2277.6	4876.6	2274	2639	4913	1361	1223	2584	6723	6648	13371	9392	11397	20789	8362
OAS30663	1	69.6216	2	29	15	R	11394.3	11197	22591.3	156.2	159.3	315.5	3962.7	3926.8	7889.5	1817.4	1620.6	3438	308.8	448.6	757.4	1536304	0.753162	1.09672	2360	1910	4270	1371	2175	3546	4689	5138	9827	3277.1	3624.3	6901.4	3894	3729	7623	2062	1829	3891	9846	9885	19731	10048	11811	21859	10022
OAS30670	2	71.9505	1	29	19	R	44700	46100.5	90800.5	2351.2	2332.8	4684	2862.3	2905.2	5767.5	1123.6	1489.4	2613	389.3	383.2	772.5	1592877	0.681131	0.991284	2134	2068	4202	1435	1620	3055	4264	5639	9903	2739.6	3185	5924.6	3228	4050	7278	951	1416	2367	9201	8626	17827	8900	11917	20817	7408
OAS30673	1	45.4194	2	29	16	R	5912.4	7094.4	13006.8	221.6	210.2	431.8	3947.7	4092.2	8039.9	1478	1585.8	3063.8	363.4	415.2	778.6	1456743	0.741925	1.08077	1764	1689	3453	1676	1947	3623	5096	3962	9058	3013.3	3012.1	6025.4	2724	2973	5697	1812	1419	3231	8920	8378	17298	9808	12683	22491	10225
OAS30677	1	69.41	2	30	18	R	13447.2	14133.8	27581	464.8	395.1	859.9	3949.2	4033.3	7982.5	1508.9	1717	3225.9	470.4	429.2	899.6	1567895	0.698274	1.04968	2140	1839	3979	1718	1828	3546	4956	4856	9812	3527.1	3604.9	7132	2477	3588	6065	1710	2219	3929	9599	11660	21259	11258	12599	23857	10758
OAS30679	1	72.4227	1	28	18	R	21934.4	20363.2	42297.6	946.2	787.7	1733.9	4109.6	4247.8	8357.4	1650.7	1877.6	3528.3	527.5	559.3	1086.8	1663995	0.683823	1.0266	2210	1734	3944	1579	1088	2667	4792	4485	9277	3249.1	3331.9	6581	3006	3646	6652	1867	1731	3598	10095	9682	19777	11588	12170	23758	10408
OAS30681	1	64.2515	1	30	14	R	15019.7	14700.5	29720.2	607.9	718.6	1326.5	3780.2	3876.3	7656.5	1531.3	1723.8	3255.1	457.9	503.9	961.8	1641483	0.699769	1.02343	2357	1651	4008	1302	1937	3239	5314	4577	9891	2922.8	3261.3	6184.1	2788	3544	6332	1870	1763	3633	8848	9410	18258	10697	12374	23071	8672
OAS30683	1	61.6827	2	30	16	R	15506.2	13547.7	29053.9	569.4	522.1	1091.5	3450.2	3067.7	6517.9	1387.4	1471.4	2858.8	459.1	532.6	991.7	1468157	0.710074	1.02137	2071	1874	3945	1913	1298	3211	5369	4941	10310	3664.2	3562.2	7226.4	2355	2778	5133	1396	1533	2929	8428	8488	16916	8795	10191	18986	8374
OAS30685	1	68.6889	2	29	12	R	2768.7	2197.5	4966.2	189	317.1	506.1	3386.1	3515.6	6901.7	1511.1	1318.1	2829.2	328.8	230.9	559.7	1200274	0.741083	1.00389	1971	1748	3719	1922	1541	3463	4441	3712	8153	2352.9	2349.6	4702.5	2469	2771	5240	1413	932	2345	8076	6937	15013	9780	10683	20463	8958
OAS30687	2	81.6777	2	29	13	R	13808.5	12131.8	25940.3	794	876.9	1670.9	3193	2680.8	5873.8	1408.9	984	2392.9	360.5	315	675.5	1370260	0.700378	1.09512	1436	1853	3289	1023	1641	2664	5592	4167	9759	3027.4	2669.5	5696.9	2352	2287	4639	1697	1144	2841	5844	6386	12230	8285	9317	17602	8657
OAS30688	1	67.2232	2	29	18	R	6105.5	6364.7	12470.2	412.3	334.8	747.1	3807.2	3790.9	7598.1	1404.2	1324.5	2728.7	459.3	557.5	1016.8	1441477	0.721708	1.00439	2063	1782	3845	1535	1329	2864	5080	4333	9413	3388.9	3303.2	6692.1	2446	2618	5064	1397	1550	2947	6534	7136	13670	10481	13132	23613	8567
OAS30690	1	59.8466	1	29	16	**	9914.9	11421.1	21336	422.2	712	1134.2	4522.1	4561.4	9083.5	1678.6	1854.4	3533	599	667.5	1266.5	1562809	0.735771	1.01484	1902	2043	3945	1308	2187	3495	5529	5399	10928	3340.2	3484.8	6825	2918	3052	5970	1469	2421	3890	9159	7612	16771	9822	11414	21236	11355
OAS30691	1	69.7155	2	30	17	R	11527.2	9935.9	21463.1	480.7	392.3	873	3630.9	4038.7	7669.6	1496.1	1589.2	3085.3	423.3	535.4	958.7	1445092	0.726262	1.06706	1571	1628	3199	1630	1663	3293	5519	5117	10636	3472.4	3602.9	7075.3	2859	2769	5628	1769	1792	3561	7901	6534	14435	9640	11101	20741	8338
OAS30693	1	52.3589	2	29	16	R	10673.8	10089.8	20763.6	368.7	417.2	785.9	4216.8	4466.6	8683.4	1698.9	1933.6	3632.5	530.2	491	1021.2	1569462	0.780881	1.12363	2050	2378	4428	1373	1968	3341	5066	5274	10340	3207.6	3291.8	6499.4	2934	3403	6337	1688	1663	3351	8123	9111	17234	11238	13946	25184	11228
OAS30694	1	61.5898	2	30	16	R	10407.7	12882.5	23290.2	275.1	378.6	653.7	3880.2	3839.6	7719.8	1573.3	1665.1	3238.4	241.3	356	597.3	1543727	0.737987	1.04051	2059	2089	4148	2569	2091	4660	6709	7173	13882	2497.3	2692.8	5190.1	2348	2461	4809	1870	1716	3586	7504	7791	15295	10742	11675	22417	9328
OAS30695	1	72.1188	1	30	18	R	14176.2	11383.9	25560.1	599.1	522.4	1121.5	4134.1	4335.3	8469.4	1684.4	1828.9	3513.3	509.6	611.8	1121.4	1740663	0.730778	1.02671	2804	2434	5238	1596	2249	3845	7348	6719	14067	3322.6	3348.4	6671	2846	3198	6044	1719	2071	3790	9946	9698	19644	12997	15299	28296	9980
OAS30699	1	43.7999	1	29	18	R	7309.3	4434.9	11744.2	327.7	247.3	575	5128	5046.9	10174.9	2118.6	2059.4	4178	779.7	868.4	1648.1	1918049	0.786228	1.06196	3107	2199	5306	1889	2830	4719	7765	7363	15128	4353.2	4117	8470.2	4192	3993	8185	3364	1940	5304	10987	11910	22897	15604	17772	33376	10635
OAS30701	1	46.1499	2	30	18	R	4035.5	3309.5	7345	230	319.2	549.2	3951.5	4061.1	8012.6	1335.8	1454.6	2790.4	562.2	543.5	1105.7	1569015	0.755445	1.07713	2748	2241	4989	1449	1597	3046	6743	5620	12363	3192.3	3236.4	6428.7	2934	3162	6096	1666	1997	3663	9620	8684	18304	9564	12546	22110	8367
OAS30703	1	72.771	2	30	16	R	33841.6	23873.2	57714.8	1102.8	1069.9	2172.7	2925.2	2883.4	5808.6	1459.5	1336.7	2796.2	270.9	318.4	589.3	1445602	0.683423	1.03167	1904	1518	3422	1288	871	2159	4949	4408	9357	3647.1	3278.9	6926	2444	2608	5052	1608	1670	3278	7433	8068	15501	9696	10605	20301	8382
OAS30706	1	80.3266	1	30	12	R	10335	9929.3	20264.3	637	668.1	1305.1	3482.1	3322.3	6804.4	1510	1518.6	3028.6	458.3	449.2	907.5	1501266	0.712851	1.05862	1492	1684	3176	1748	2274	4022	6435	5413	11848	3065.8	3549.9	6615.7	2874	3089	5963	1498	1683	3181	6394	7314	13708	10272	11146	21418	9343
OAS30708	1	81.7571	2	30	18	R	13112.7	14020.2	27132.9	509.4	533.9	1043.3	3647.5	3566.5	7214	1347.2	1347.8	2695	408.5	453.7	862.2	1497670	0.708904	1.03483	2181	1705	3886	1497	1778	3275	4788	4533	9321	3474.7	3402.2	6876.9	2275	2753	5028	1764	1915	3679	7970	7826	15796	9421	11864	21285	8489
OAS30710	1	65.751	2	30	12	L	7836.5	9681.8	17518.3	204.6	399.5	604.1	4209.6	4492.1	8701.7	1641.5	1383.7	3025.2	429	431.9	860.9	1637383	0.753497	1.10663	2209	1957	4166	2098	1863	3961	5861	4664	10525	3195.3	3189	6384.3	2908	3608	6516	2218	2089	4307	8275	9158	17433	12511	17023	29534	10546
OAS30711	1	58.7937	2	30	18	R	15532.6	13842.7	29375.3	275.9	342.6	618.5	4318.8	4310.6	8629.4	1820.8	1932.4	3753.2	573.1	698	1271.1	1810954	0.790649	1.12475	2696	2456	5152	1893	2434	4327	7416	6749	14165	4220.9	5353.5	9574.4	2446	2571	5017	1241	1552	2793	8209	6903	15112	12909	13672	26581	12493
OAS30713	2	75.3681	1	30	18	R	17156.2	16782	33938.2	666.5	730.2	1396.7	3895.7	3558.7	7454.4	1664.5	1729.8	3394.3	494	534.2	1028.2	1886271	0.697995	1.07095	2231	2109	4340	1483	1847	3330	6557	4310	10867	3852.3	3918.7	7771	3326	3284	6610	2327	2055	4382	9971	9363	19334	12513	15402	27915	10772
OAS30715	1	53.0166	1	30	16	R	5591.9	4711.1	10303	363.4	532.5	895.9	4400.4	4501.6	8902	1824	1893.5	3717.5	483.3	482.9	966.2	1521888	0.774113	1.08389	1700	1531	3231	1923	1971	3894	6227	6022	12249	3785.3	3705.2	7490.5	3495	4114	7609	2335	2391	4726	10301	9073	19374	8197	15608	23805	9730
OAS30716	1	72.3327	2	30	12	R	14526.7	13917	28443.7	597.6	549.4	1147	3315.7	3219.9	6535.6	1296.6	1293.8	2590.4	348	403.9	751.9	1450937	0.764007	1.1278	1701	2017	3718	1819	1732	3551	5152	6120	11272	2608.4	2715.5	5323.9	2527	2726	5253	1531	1607	3138	9439	9095	18534	10690	12465	23155	11903
OAS30719	2	64.1876	2	29	14	R	12544.4	10964.6	23509	258.5	440.9	699.4	3406.6	3723.6	7130.2	1350.9	1318.5	2669.4	500.4	444.4	944.8	1333627	0.721474	1.05406	1658	2007	3665	1542	1980	3522	4195	3831	8026	2682.9	2764.9	5447.8	2306	2083	4389	1482	1633	3115	8260	7973	16233	9284	10630	19914	7546
OAS30721	1	68.7522	2	29	14	R	5213.4	4965.6	10179	164.1	214.2	378.3	3571.2	3796.2	7367.4	1329.3	1422.8	2752.1	608.4	575.3	1183.7	1370286	0.737795	1.05978	1803	1772	3575	1294	1448	2742	4566	4014	8580	2676.5	2704.2	5380.7	2594	2870	5464	1776	1782	3558	8589	8254	16843	9723	11134	20857	8830
OAS30722	1	66.5261	2	30	18	R	7569.5	8369.8	15939.3	354.3	326.7	681	3878.3	3821.4	7699.7	1423.1	1519.9	2943	540.4	524.9	1065.3	1472187	0.721606	1.02957	2119	1789	3908	1459	1893	3352	6175	6146	12321	3247.3	3409.2	6656.5	2851	3063	5914	1870	1695	3565	8706	8963	17669	8965	11684	20649	7994
OAS30723	1	69.1666	1	30	18	R	16718.9	12399.3	29118.2	476	275.6	751.6	4196.6	4217.8	8414.4	1568.7	1705.7	3274.4	442	519.1	961.1	1746375	0.731248	1.03588	2542	1847	4389	1191	2208	3399	5127	4325	9452	3713.9	3963.5	7677.4	3019	3116	6135	2855	2527	5382	9451	9046	18497	10620	12719	23339	10715
OAS30724	2	77.4593	1	29	18	R	58729.5	35262.6	93992.1	3752.1	3611.2	7363.3	3351.1	3590.9	6942	1591.6	1421.2	3012.8	243	336.7	579.7	1764948	0.62201	0.920091	1961	1709	3670	974	2028	3002	6160	5055	11215	4299.9	3678.8	7978.7	2513	3246	5759	1826	1619	3445	9180	9839	19019	12538	13518	26056	10382
OAS30725	1	60.7943	2	30	16	R	5300.8	4808.6	10109.4	118.8	196.3	315.1	3548.6	3388.2	6936.8	1238.8	1200	2438.8	563.7	578.1	1141.8	1402698	0.770621	1.06489	1922	1752	3674	1086	1641	2727	5501	4780	10281	3040.8	3076.7	6117.5	3223	4062	7285	1166	1476	2642	8302	7500	15802	9866	10293	20159	8133
OAS30726	1	65.4694	1	29	15	R	9417.2	8553.3	17970.5	624.1	234.8	858.9	4703	4668.4	9371.4	1597.7	1792.1	3389.8	506.6	543.7	1050.3	1607499	0.746535	1.04641	2059	1973	4032	1773	1741	3514	6611	6091	12702	3368.2	3373	6741.2	3150	4340	7490	2254	2175	4429	10574	11439	22013	12130	15519	27649	11385
OAS30727	1	67.2199	1	30	13	R	11992.5	12780.3	24772.8	412.5	413	825.5	4306.7	4476	8782.7	1588.5	1538.1	3126.6	310	364.4	674.4	1658906	0.710436	1.0217	2110	1511	3621	1503	2125	3628	5144	3993	9137	3214.2	3256.1	6470.3	2213	2712	4925	1684	1747	3431	8690	9231	17921	9706	12312	22018	10288
OAS30730	1	56.5483	2	29	14	R	13567.3	12886.5	26453.8	248.6	204.7	453.3	3947.5	4065.5	8013	1727.3	1829.9	3557.2	387.1	373.9	761	1647046	0.710698	1.03524	2462	2380	4842	2436	2007	4443	5092	5174	10266	3430.5	3350.8	6781.3	2233	2507	4740	2195	2172	4367	9415	8381	17796	12707	13433	26140	10986
OAS30731	1	72.1022	2	27	16	R	5961.8	5308.1	11269.9	340.4	583.4	923.8	3589.7	3481.3	7071	1253.6	1231.3	2484.9	333.6	459	792.6	1419333	0.708539	1.0669	1750	1876	3626	1568	1227	2795	5522	4730	10252	2837.6	3053.4	5891	2593	2973	5566	1534	1416	2950	8497	8791	17288	10989	12306	23295	8175
OAS30739	1	72.9816	2	29	18	R	10286.8	14781.4	25068.2	288.2	284.7	572.9	3015.9	3169.6	6185.5	1196.9	1224.6	2421.5	389.2	350.4	739.6	1400617	0.702957	1.03132	1956	1711	3667	2115	1598	3713	4744	3817	8561	2696.9	2796.4	5493.3	3001	2926	5927	1034	1523	2557	7659	8377	16036	9350	11984	21334	9880
OAS30743	1	72.6416	1	30	20	L	20897.3	12957.3	33854.6	691.4	513.3	1204.7	3464.4	3743.3	7207.7	1262.7	1295.3	2558	323	421.7	744.7	1646380	0.666549	0.981876	2129	1833	3962	1788	1668	3456	4673	3653	8326	3351.9	3421.3	6773.2	3010	4103	7113	2743	1931	4674	7797	8596	16393	9242	12306	21548	8022
OAS30746	1	75.1972	2	28	13	R	10549.8	9737.1	20286.9	260.9	435.3	696.2	3371.2	3334.4	6705.6	1252.1	1254.8	2506.9	454.6	480.4	935	1342512	0.745066	1.08313	1518	1501	3019	1149	1372	2521	5044	4518	9562	2630.6	2906.6	5537.2	2019	2164	4183	1541	1542	3083	7762	7821	15583	8267	10229	18496	8421
OAS30754	1	61.5528	1	30	14	L	17223.4	16192.3	33415.7	393.3	229.2	622.5	3738.4	3776.4	7514.8	1498.9	1727.6	3226.5	453.1	518.6	971.7	1708018	0.728726	1.05471	3354	2311	5665	1396	2231	3627	6149	5144	11293	3254.7	3411.5	6666.2	3173	3914	7087	1544	1757	3301	8877	9283	18160	14283	17760	32043	12516
OAS30755	1	67.2649	2	28	13	R	8097.4	13118	21215.4	433.2	277.1	710.3	3673.4	3440.8	7114.2	1685.2	1474.5	3159.7	499.9	554.1	1054	1370632	0.727227	1.0351	2070	1906	3976	1507	1719	3226	5620	5003	10623	3684.1	3901.1	7585.2	2672	3171	5843	1588	1991	3579	8056	7356	15412	9243	11221	20464	9848
OAS30756	1	52.9889	2	30	16	R	15457.5	11463.3	26920.8	347.7	334.8	682.5	3883	4024.3	7907.3	1700.6	1597.3	3297.9	494.2	539.3	1033.5	1459901	0.730816	1.06144	1548	1949	3497	1135	1883	3018	5206	4799	10005	3154.5	3290	6444.5	1984	2593	4577	2376	1889	4265	7862	8520	16382	11166	13190	24356	10002
OAS30759	1	69.7249	2	30	20	R	7463	7781.8	15244.8	256.5	257.2	513.7	4156.3	4289.6	8445.9	1715	1553.7	3268.7	407.2	581.5	988.7	1598007	0.755804	1.07535	2335	1988	4323	1961	2280	4241	5472	5593	11065	3143.2	3264.6	6407.8	3298	3727	7025	2054	2411	4465	9096	9878	18974	10736	13168	23904	11616
OAS30764	1	68.1327	2	29	18	R	9591.2	9098.8	18690	312.3	299	611.3	4095.4	4113.1	8208.5	1457.3	1743.8	3201.1	580	744.7	1324.7	1565536	0.748331	1.11236	2334	2478	4812	1374	2320	3694	4950	4199	9149	2745.4	3102.6	5848	2500	2539	5039	1811	1542	3353	9520	9167	18687	10455	13045	23500	9628
OAS30765	1	67.3571	2	28	12	R	10635.1	8567.1	19202.2	431.1	243.8	674.9	3149.1	3248.1	6397.2	1402.8	1284.6	2687.4	475.2	472.5	947.7	1367727	0.731444	1.00696	1410	1975	3385	1305	2030	3335	5115	4735	9850	2878.1	3236.1	6114.2	2952	3321	6273	1758	1271	3029	7884	7447	15331	9558	12797	22355	10123
OAS30766	1	69.1382	1	30	16	R	29586.1	26157.9	55744	950	650.5	1600.5	4703.6	4810.4	9514	1936.4	2186	4122.4	619.8	644	1263.8	1888231	0.712586	1.0173	3380	2015	5395	1776	2271	4047	7380	5284	12664	4210.7	4281.2	8491.9	3225	4016	7241	1809	2453	4262	10011	8933	18944	12127	13870	25997	10873
OAS30767	1	65.9505	2	29	12	R	9583	8543.2	18126.2	331.3	394.8	726.1	3869.5	3953.7	7823.2	1302.3	1441.6	2743.9	486.2	545.4	1031.6	1418274	0.716577	1.00947	2348	1709	4057	1443	1534	2977	5099	4213	9312	3163.4	3278.9	6442.3	2718	2814	5532	1582	1572	3154	7912	8564	16476	9294	13129	22423	9861
OAS30768	1	68.0266	2	30	20	R	11286.8	12810.1	24096.9	610.8	479	1089.8	3925.9	3789.6	7715.5	1428.6	1540.9	2969.5	430.3	428.9	859.2	1585587	0.724589	1.10708	2159	1692	3851	1007	1938	2945	5488	5055	10543	2890.3	3059.4	5949.7	2910	2839	5749	1826	1573	3399	9020	9050	18070	10491	12920	23411	10917
OAS30769	1	68.8583	1	28	18	L	22841.6	20202.9	43044.5	792.7	715.2	1507.9	3769.4	3744.5	7513.9	1491.4	1365.9	2857.3	436.7	526.9	963.6	1574372	0.712914	1.05174	1485	1731	3216	1824	2137	3961	5566	5258	10824	2988.6	3011.2	5999.8	2428	3063	5491	2868	2851	5719	8492	8172	16664	8241	12639	20880	9439
OAS30775	2	78.0729	2	29	18	R	31257.3	32208.5	63465.8	1731.5	1732	3463.5	3460.9	3328.3	6789.2	1138.6	1375.8	2514.4	302.6	282	584.6	1584267	0.698188	1.01917	2483	1504	3987	1159	993	2152	5694	4332	10026	3617.9	3795.5	7413.4	3025	3223	6248	1548	1428	2976	9091	7917	17008	12062	14433	26495	10348
OAS30777	2	77.531	2	30	15	R	27210.4	24520.6	51731	1447.7	1117.9	2565.6	3857.6	4073.4	7931	1792.8	1722.2	3515	376.1	478.1	854.2	1456081	0.695433	0.975964	1695	1408	3103	1038	1828	2866	4683	4759	9442	2937	2915.9	5852.9	2393	2963	5356	1961	1577	3538	9917	8320	18237	10603	12588	23191	7512
OAS30780	1	75.3027	2	26	13	R	7419.2	6865	14284.2	449.4	293.8	743.2	3485	3816.6	7301.6	1261.9	1566.9	2828.8	534.4	509.4	1043.8	1336677	0.950345	1.2811	1692	1643	3335	1304	1927	3231	5756	5395	11151	3329.6	3562.5	6892.1	2020	2738	4758	1641	1691	3332	7802	9391	17193	10383	10073	20456	7237
OAS30783	1	69.2755	2	28	12	L	4946.4	6206.2	11152.6	141.5	186.8	328.3	3579	3619.3	7198.3	1484.3	1384	2868.3	452.1	510.6	962.7	1281979	1.01095	1.4873	1427	1457	2884	1304	1722	3026	4792	4283	9075	2960.1	3076.8	6036.9	2334	2526	4860	1111	1509	2620	7029	7127	14156	8400	11363	19763	7589
OAS30785	2	79.4866	1	29	18	R	34392.8	27445.5	61838.3	2233.3	1422.9	3656.2	2755.9	3364.5	6120.4	1193	1326.7	2519.7	418.6	527.9	946.5	1760881	0.696092	1.00256	1813	1690	3503	1761	2180	3941	5906	6133	12039	5526.4	4840.8	10367.2	2705	3279	5984	1370	1612	2982	7392	7692	15084	9080	13783	22863	8920
OAS30790	2	64.3967	1	29	15	R	33763	33273.8	67036.8	908.8	596	1504.8	3443.6	3619.6	7063.2	1541	1757.9	3298.9	373.8	460.8	834.6	1776598	0.696078	1.02012	2003	2239	4242	1494	1657	3151	5837	5994	11831	3818.7	3451.3	7270	2495	3156	5651	1949	2093	4042	8993	7479	16472	14037	17161	31198	11088
OAS30792	1	59.2843	2	29	12	R	6137.9	6623.1	12761	240.8	193.1	433.9	3432.5	3568.4	7000.9	1479.5	1440.4	2919.9	407.3	527.1	934.4	1321465	0.722272	1.03752	1897	1613	3510	1277	1538	2815	4140	4049	8189	2915.1	2809.5	5724.6	2284	2949	5233	1429	1555	2984	8097	8420	16517	10026	11555	21581	8275
OAS30797	2	69.0332	1	27	18	R	25020.3	17202.2	42222.5	847.2	815.8	1663	4332.6	4587.3	8919.9	1515.9	1977.3	3493.2	451.3	572.2	1023.5	1925163	0.688278	0.971999	2472	1899	4371	1661	1741	3402	6646	6430	13076	3376.4	3596.9	6973.3	4239	5258	9497	2216	2456	4672	10306	9276	19582	11604	16175	27779	12477
OAS30798	1	68.6566	1	30	18	R	26444.7	16604.7	43049.4	1313.1	703.7	2016.8	4058	4483.5	8541.5	1741.7	1911.8	3653.5	463.3	562.7	1026	1631482	0.718064	0.988484	2248	2034	4282	1226	2361	3587	6502	5706	12208	4162.7	4166.7	8329.4	3205	3384	6589	2131	2200	4331	9000	9607	18607	10327	12558	22885	10113
OAS30799	2	73.8866	2	29	12	R	9998.8	9594.9	19593.7	288.8	285.7	574.5	4103.1	3957.6	8060.7	1576.9	1476.6	3053.5	421.2	435.6	856.8	1547664	0.738406	1.02742	2216	2383	4599	1589	2205	3794	5721	6338	12059	3490.7	3508	6998.7	2920	2924	5844	2268	2299	4567	10508	9787	20295	11467	12915	24382	10802
OAS30800	1	63.0005	1	30	18	R	10189.6	11285.2	21474.8	372.3	447.1	819.4	3717	3804	7521	1748.5	1853.4	3601.9	515.5	467	982.5	1533637	0.810631	1.16877	1923	1695	3618	1546	1750	3296	4842	4569	9411	2841.6	2970.9	5812.5	3749	3655	7404	1610	1842	3452	8298	8439	16737	9755	12967	22722	10379
OAS30801	1	71.3393	2	30	15	R	9297.8	9602.6	18900.4	318.8	318.8	637.6	3816.9	4166.7	7983.6	1346.5	1215.7	2562.2	380.3	388	768.3	1453212	0.700553	1.02549	1648	2159	3807	1566	1335	2901	5269	4884	10153	2682.2	2947.1	5629.3	2290	2436	4726	1721	1804	3525	7936	7755	15691	8708	12479	21187	10350
OAS30803	1	52.5888	2	30	20	R	8675.4	8925.1	17600.5	341.2	237.3	578.5	3974.5	3941.1	7915.6	1381.7	1495.1	2876.8	415.6	530.5	946.1	1429880	0.744572	1.0294	2440	1697	4137	2029	1640	3669	5431	5509	10940	2747.4	2852.2	5599.6	2973	2697	5670	1843	1670	3513	7445	9281	16726	10697	9360	20057	11150
OAS30813	1	70.9832	2	30	20	R	10385.2	11372.5	21757.7	359.4	738.4	1097.8	2813.4	3628.2	6441.6	1298.8	1429.3	2728.1	369.5	424	793.5	1419194	0.695729	1.03874	1764	1534	3298	1482	1707	3189	6024	5102	11126	2827.7	2951.7	5779.4	3463	3524	6987	1529	1584	3113	7259	7384	14643	8992	10120	19112	6999
OAS30814	2	85.2087	1	29	16	L	24129.3	30379.1	54508.4	2111.3	2929	5040.3	2946.6	2485.5	5432.1	1452.7	1840.2	3292.9	237.4	355.8	593.2	1682951	0.659448	1.01598	2091	2205	4296	2507	2152	4659	6568	7175	13743	3656.3	3584.9	7241.2	2709	3728	6437	1201	1256	2457	8227	8259	16486	11087	10930	22017	6858
OAS30818	2	74.8359	1	28	16	R	8688.7	10784.5	19473.2	433.3	377.8	811.1	3800.4	3966.2	7766.6	1673.3	1655.5	3328.8	469.5	582.1	1051.6	1505899	0.719832	1.03868	2158	1870	4028	1458	1585	3043	5546	4851	10397	3306	3492.6	6798.6	2674	2711	5385	1656	1506	3162	8268	8315	16583	8517	14419	22936	10745
OAS30819	1	72.3638	2	29	18	R	13164.7	11355.1	24519.8	382	226.8	608.8	3260.8	3512.8	6773.6	1283.6	1465.6	2749.2	395.6	522.6	918.2	1385836	0.716958	0.997757	1458	1602	3060	1019	1234	2253	5629	5480	11109	2754.2	2860.4	5614.6	2043	2586	4629	1727	1609	3336	8404	9310	17714	9155	11327	20482	7982
OAS30820	1	65.9044	2	29	16	R	26823.7	32369.2	59192.9	752.3	629.6	1381.9	3373.6	3380.1	6753.7	1403.9	1351.6	2755.5	413.5	428.7	842.2	1485853	0.690079	0.999857	2023	1663	3686	1161	1410	2571	3743	4123	7866	3469.5	3635	7104.5	2699	3040	5739	1931	1470	3401	8026	8074	16100	9333	12303	21636	10237
OAS30821	1	57.4149	2	29	16	R	12069.2	12282.5	24351.7	570.1	517.6	1087.7	4327.6	4501.4	8829	1492.8	1391.1	2883.9	563.7	460.3	1024	1635307	0.728247	1.00857	1616	2060	3676	2205	1696	3901	7239	6628	13867	3262.3	3379.3	6641.6	2839	3587	6426	1896	1987	3883	10291	9043	19334	9630	13184	22814	11100
OAS30822	1	66.64	2	30	16	R	16797.2	21701.5	38498.7	458	610.4	1068.4	4204	4030.3	8234.3	1705.5	1725.2	3430.7	483.9	546.7	1030.6	1621112	0.720834	1.04557	2335	2180	4515	1241	2475	3716	5640	5234	10874	3410.6	3539	6949.6	3376	3621	6997	1611	1639	3250	9023	10380	19403	10065	13360	23425	12438
OAS30823	1	70.4127	1	28	18	R	35412.1	24061.2	59473.3	1585.4	965.9	2551.3	3812.1	4047.7	7859.8	1728.3	1757.5	3485.8	426.2	535.6	961.8	1771403	0.703703	0.99635	3133	2170	5303	1805	1721	3526	7192	5365	12557	3071.8	3072.1	6143.9	3021	3255	6276	2256	2414	4670	9324	8453	17777	12655	13534	26189	10569
OAS30824	1	73.5938	2	30	19	R	8181.4	8478	16659.4	524.5	263.6	788.1	3540.7	3526.3	7067	1542	1470.9	3012.9	428.1	526.4	954.5	1462558	0.892877	1.39139	1935	2195	4130	1203	1821	3024	4529	4783	9312	2989.2	3171.8	6161	2563	2802	5365	1493	1903	3396	8781	6535	15316	12116	12255	24371	10264
OAS30825	2	79.4388	1	29	16	L	75063.5	68031	143094	5000.8	2780.2	7781	3896.2	4420	8316.2	1703.1	1886.5	3589.6	502.3	452.5	954.8	2026123	0.663618	1.00472	1795	1942	3737	732	2018	2750	6670	6899	13569	4115.3	4051.9	8167.2	3435	3681	7116	1811	1322	3133	9785	9992	19777	13403	15320	28723	12306
OAS30830	2	71.2833	1	24	18	B	37360.4	34362.2	71722.6	1842	1513.9	3355.9	3750	3888.2	7638.2	1314.6	1870.2	3184.8	361	544.1	905.1	1852083	0.677688	1.02692	2065	1892	3957	2230	1771	4001	6227	5211	11438	3985.2	4018.1	8003.3	4863	5765	10628	1828	1341	3169	10666	8397	19063	10290	14410	24700	9361
OAS30839	2	74.9007	2	28	12	R	19415.1	11812.6	31227.7	735.3	775	1510.3	3355.3	3715.6	7070.9	1490	1482.5	2972.5	396.5	307.8	704.3	1456115	0.715314	1.00834	2522	1946	4468	1356	1371	2727	5245	4561	9806	3581.7	3323.9	6905.6	2745	2967	5712	1389	1333	2722	8817	9231	18048	9954	12728	22682	9744
OAS30840	1	67.6766	2	29	13	R	12397.3	12955.6	25352.9	527.8	403.2	931	3776.7	3381.2	7157.9	1389.3	1514.2	2903.5	468.1	531.2	999.3	1690691	0.792655	1.16091	2164	2031	4195	1668	2166	3834	6716	6679	13395	3096.4	3381.4	6477.8	2644	3151	5795	2046	1733	3779	8850	9457	18307	12956	12816	25772	10692
OAS30841	1	78.8792	1	29	20	R	19948.8	20613.3	40562.1	997	872.2	1869.2	4510.4	4177.8	8688.2	1723.2	1792.3	3515.5	441.7	476.2	917.9	1645551	0.720622	1.007	2033	1232	3265	2130	1533	3663	5911	5566	11477	3452.5	3537.4	6989.9	4320	3754	8074	1752	1483	3235	8918	10053	18971	10820	10427	21247	9994
OAS30844	1	69.5172	2	28	18	R	21355	22433.2	43788.2	1010.1	1231	2241.1	3480.4	3778.8	7259.2	1301.9	1317.7	2619.6	329.5	263.3	592.8	1370826	0.670114	0.973735	1664	1586	3250	1371	2302	3673	4437	3572	8009	3256.2	2758.6	6014.8	2953	2846	5799	1426	2325	3751	6580	6253	12833	9573	9825	19398	7771
OAS30845	1	66.4388	2	30	14	R	3330.4	2606.5	5936.9	167.6	648.9	816.5	4309.3	4655.8	8965.1	1543.4	1604.5	3147.9	676	642.2	1318.2	1401043	0.808233	1.08726	2230	2265	4495	491	1051	1542	4062	3971	8033	3744	3764.5	7508.5	2778	2779	5557	2259	2485	4744	9135	8813	17948	12589	13726	26315	7696
OAS30846	1	59.0243	2	29	13	R	7867.8	6620.6	14488.4	181	263.6	444.6	3624.5	3702.3	7326.8	1465.4	1586.2	3051.6	385.2	410.2	795.4	1480765	0.833921	1.16897	1999	1944	3943	1513	2163	3676	5167	5761	10928	2940.7	3022.4	5963.1	2578	2952	5530	1972	1733	3705	10205	9436	19641	11345	12222	23567	9998
OAS30848	2	77.1244	1	29	24	R	49245.4	33406.4	82651.8	2688.4	1225.5	3913.9	3571.5	3906.3	7477.8	1352.7	1630.9	2983.6	327.6	394.4	722	1686785	0.636044	0.947925	2615	2042	4657	1583	2153	3736	5893	5151	11044	2722.4	2741.7	5464.1	2691	2908	5599	2084	2101	4185	8522	8449	16971	11960	12682	24642	9618
OAS30854	1	65.4416	1	29	18	R	15497.6	12069.2	27566.8	403.3	432	835.3	3883.4	4026	7909.4	1426.7	1593.7	3020.4	402.6	376.4	779	1383990	0.758975	1.10689	1796	1994	3790	1235	1678	2913	6748	5330	12078	3394.7	3323.6	6718.3	2343	2903	5246	1599	1956	3555	8453	8448	16901	8713	9517	18230	9849
OAS30857	1	50.121	1	30	18	R	5976.9	5300.5	11277.4	213.5	250.7	464.2	4306.4	4464.4	8770.8	2134	2418.7	4552.7	691.4	845.8	1537.2	1747029	0.754062	1.01776	3241	2516	5757	1772	2099	3871	7266	6682	13948	3922.1	3956.4	7878.5	2240	3522	5762	1904	1977	3881	11911	12312	24223	13782	14406	28188	10957
OAS30858	1	69.4666	2	29	15	R	7098.8	7590.9	14689.7	502.2	403.2	905.4	3945.8	4143	8088.8	1635	1745	3380	543.3	495.2	1038.5	1544636	0.781816	1.16362	2625	1841	4466	1224	2225	3449	4415	4893	9308	3609.8	4194	7803.8	2404	2669	5073	1730	2116	3846	7888	7943	15831	10960	13238	24198	10364
OAS30861	1	75.3404	2	29	18	R	9204.9	8259.6	17464.5	295.8	412.5	708.3	3527.6	3772.3	7299.9	1026	1195	2221	439	439.7	878.7	1330352	0.678533	1.04793	1889	1554	3443	1172	1913	3085	4575	4446	9021	3040.1	3113.7	6153.8	2224	2728	4952	1414	1471	2885	8321	8604	16925	9890	10630	20520	8680
OAS30863	2	71.0321	2	30	19	R	11917.8	11791.5	23709.3	384.2	363	747.2	3427.3	3304.4	6731.7	1291.8	1356.3	2648.1	480.5	472.7	953.2	1397491	0.726987	1.06149	1593	1914	3507	2065	1375	3440	5689	5356	11045	3025.3	2946.2	5971.5	2198	2555	4753	1805	1271	3076	9442	7787	17229	9071	14075	23146	7248
OAS30864	2	75.7843	1	25	12	L	20865.5	18915	39780.5	1061.2	546.7	1607.9	3250.8	3571.2	6822	1169.6	1418.8	2588.4	485.8	580.5	1066.3	1646620	0.684344	0.998875	1827	2315	4142	2124	1450	3574	7351	5803	13154	3619.9	3534.3	7154.2	2236	3229	5465	1784	1884	3668	10470	9973	20443	11345	13398	24743	11282
OAS30867	2	80.5318	2	29	16	R	33981.8	29293.9	63275.7	1061.8	780.9	1842.7	3276.2	3487.3	6763.5	1453.8	1410.7	2864.5	277.5	341.7	619.2	1479114	0.692198	1.04525	1897	2071	3968	1514	1925	3439	5044	4311	9355	3787	3663.9	7450.9	1970	2134	4104	1367	1390	2757	7602	6706	14308	9792	12767	22559	8692
OAS30869	2	72.3553	2	26	16	R	14185.5	9770	23955.5	2022.9	681.8	2704.7	3092.9	3750.4	6843.3	958.4	1482.5	2440.9	231.7	517.2	748.9	1507063	0.690425	1.00842	1916	1906	3822	1694	2002	3696	5758	5200	10958	3512.8	3504	7016.8	2512	2800	5312	1328	1568	2896	6335	8788	15123	10795	12848	23643	7174
OAS30871	1	68.6511	2	30	14	R	16627.8	17180.3	33808.1	400.9	406.3	807.2	3467.3	3307	6774.3	1284.1	1271	2555.1	411.4	423.8	835.2	1509330	0.676487	1.00466	1941	1858	3799	1613	1381	2994	4789	4280	9069	3289.9	3128.4	6418.3	2981	3332	6313	1714	2142	3856	8040	9023	17063	10785	11763	22548	9624
OAS30872	1	71.187	2	29	14	R	17898.2	24771.2	42669.4	449.3	613.9	1063.2	3633.2	3616.5	7249.7	1489.5	1389.8	2879.3	395.2	438.5	833.7	1490481	0.755042	1.03212	1998	1770	3768	1747	1880	3627	5219	5194	10413	3041.6	3245.7	6287.3	2437	2503	4940	1627	1579	3206	8093	8314	16407	11787	13006	24793	10110
OAS30875	1	66.6176	1	29	19	R	8093.6	6383.9	14477.5	417.2	537.6	954.8	4226.6	4389.1	8615.7	1643	1624.8	3267.8	412.5	476.9	889.4	1674042	0.744218	1.08144	1919	2383	4302	1782	1630	3412	5281	4896	10177	2882.6	2975.9	5858.5	2625	3126	5751	2665	2230	4895	9768	9180	18948	11273	13308	24581	12159
OAS30881	1	65.6621	2	29	16	R	8499.3	8180.1	16679.4	292.9	249.4	542.3	3526.9	3822.9	7349.8	1563.1	1616.6	3179.7	438.2	484.2	922.4	1623600	0.741478	1.04106	2621	2154	4775	1971	2569	4540	5719	6154	11873	3477.1	3644.5	7121.6	2916	3427	6343	2516	2158	4674	9680	10025	19705	12788	17360	30148	11277
OAS30883	2	80.668	2	28	18	R	12278.6	8856	21134.6	574.1	482.4	1056.5	3259	3342.5	6601.5	1167.8	1337	2504.8	308.1	372.8	680.9	1288141	0.695033	0.999843	1966	1885	3851	1456	1184	2640	4603	4007	8610	2553.7	2584.2	5137.9	2447	2693	5140	1508	1827	3335	8055	7686	15741	9689	12262	21951	8423
OAS30887	1	61.0477	2	29	16	R	7574.9	6125.4	13700.3	149.3	164.6	313.9	4312.9	4603.3	8916.2	1427.8	1533.9	2961.7	547.6	475.6	1023.2	1650103	0.725877	1.03117	2394	2589	4983	1594	1849	3443	5016	4849	9865	3259.1	3342.7	6601.8	2798	3887	6685	1381	1140	2521	7689	8434	16123	12526	14862	27388	10005
OAS30888	1	65.8833	2	28	14	R	11625.7	14436.4	26062.1	592.2	645.8	1238	3655.1	3848.2	7503.3	1574.9	1539.1	3114	438	513.4	951.4	1651605	0.69874	1.05097	1850	2184	4034	1536	1232	2768	5463	4286	9749	2963.7	3081.6	6045.3	2382	2613	4995	1895	1867	3762	8095	9016	17111	11665	13242	24907	10093
OAS30895	2	79.947	2	28	12	R	58340.3	52013.9	110354	2109.3	2249.6	4358.9	2963.9	2790.1	5754	978	1105.8	2083.8	295.5	268.2	563.7	1716938	0.62494	0.977171	2045	1762	3807	1983	1364	3347	6197	5369	11566	4467	4564.3	9031.3	2405	2727	5132	1246	1513	2759	8387	7990	16377	9962	12951	22913	7584
OAS30898	2	76.694	2	29	14	R	8408.8	9069	17477.8	272.4	347.7	620.1	3169.7	3230.5	6400.2	1184.5	1349.8	2534.3	368.5	468.4	836.9	1199602	0.698067	1.01062	1400	1365	2765	958	1185	2143	4357	4385	8742	2700.3	2811.6	5511.9	1963	2559	4522	1225	1323	2548	7009	6608	13617	8203	10298	18501	8501
OAS30899	2	74.9099	1	29	20	R	23706.8	13702.1	37408.9	1086.3	635.5	1721.8	3044.1	3155.5	6199.6	1498.1	1771.2	3269.3	502.7	588.6	1091.3	1915819	0.682176	1.04234	2069	1777	3846	1809	3026	4835	7171	7065	14236	3952.4	3805.6	7758	3642	4193	7835	1839	2263	4102	11179	9868	21047	13826	16068	29894	10702
OAS30900	1	58.1016	1	29	12	R	8447.9	9531.9	17979.8	301.7	350.2	651.9	3188.1	3406.5	6594.6	1550.2	1533.1	3083.3	496.3	543.1	1039.4	1421368	0.724493	1.02204	1959	1901	3860	1196	1739	2935	3525	3992	7517	3019	3364	6383	2956	2660	5616	1625	1359	2984	10315	10064	20379	8877	10968	19845	7519
OAS30903	2	79.3177	1	30	20	R	17823.2	15188	33011.2	709.7	641.7	1351.4	3433	3604	7037	1747.3	1932	3679.3	343	458.1	801.1	1486731	0.672951	0.988713	2197	1615	3812	1971	1373	3344	4713	5197	9910	3793.5	3928.7	7722.2	2447	2284	4731	1920	1849	3769	7867	7670	15537	8678	9835	18513	8075
OAS30906	1	69.4972	2	28	14	R	4367.8	4268.1	8635.9	148.7	366.6	515.3	3401.1	3708	7109.1	1432.5	1461	2893.5	387.1	462.7	849.8	1259324	0.735709	1.01089	1911	1809	3720	1337	1449	2786	4750	4672	9422	2972.4	3017.4	5989.8	2035	2369	4404	1496	1700	3196	8868	7505	16373	9494	11154	20648	9055
OAS30907	1	83.1932	1	29	16	R	17472.4	13839	31311.4	440.1	569.3	1009.4	4061	4297.1	8358.1	1673.8	1748.6	3422.4	362.8	482.1	844.9	1608447	0.713107	1.00873	2082	1638	3720	1479	2581	4060	5596	5455	11051	3845.6	3739.4	7585	2899	3462	6361	1992	2379	4371	8841	8361	17202	11831	10978	22809	10273
OAS30909	1	81.9827	1	30	16	R	35553.4	29491.6	65045	2199.7	1336.1	3535.8	3000.6	3244.5	6245.1	1069.9	1310.9	2380.8	391.9	437.5	829.4	1611644	0.646286	0.9445	2474	1852	4326	1770	1855	3625	4833	5945	10778	3940.1	3937	7877.1	3094	3557	6651	1605	1489	3094	9200	9050	18250	8802	9911	18713	10618
OAS30910	1	73.3499	1	28	20	R	19657.4	23141	42798.4	1121.2	648.8	1770	4611.4	4334	8945.4	1977.8	1897.6	3875.4	435.2	458	893.2	1915615	0.688396	1.02819	2079	2208	4287	1365	2248	3613	6056	5937	11993	3030.5	3190.3	6220.8	4407	4666	9073	3145	2760	5905	11247	10370	21617	13872	13675	27547	13827
OAS30916	1	69.2676	2	30	20	R	14030.4	15953.6	29984	900.4	614.3	1514.7	3683.2	3862.5	7545.7	1633.1	1459	3092.1	412.8	417.4	830.2	1518163	0.71346	1.04053	2400	1965	4365	1241	1994	3235	6655	6845	13500	3009.5	3223	6232.5	2866	2879	5745	1853	1986	3839	9712	10051	19763	11740	13563	25303	10103
OAS30917	1	70.2772	1	30	20	R	19695.3	20405.9	40101.2	401.6	720.8	1122.4	3915.1	4443.4	8358.5	1817.3	2015.7	3833	458.2	653.8	1112	2020438	0.670314	0.998301	3242	2371	5613	1671	2805	4476	6560	6125	12685	3502.6	4066.7	7569.3	2940	3214	6154	2429	2663	5092	11385	11772	23157	13190	17205	30395	11471
OAS30920	1	58.3272	1	30	14	R	9510.6	10843.4	20354	235.5	365.2	600.7	3293	3323.4	6616.4	1119.2	1102.3	2221.5	370.5	476.5	847	1387267	0.726003	1.03238	2168	1753	3921	1380	1676	3056	4913	4995	9908	2913	2929.3	5842.3	2844	2351	5195	927	901	1828	8100	7532	15632	11266	10692	21958	11103
OAS30921	2	73.1542	1	29	17	R	17165.7	13879.4	31045.1	705.5	894.8	1600.3	4339.1	4273.2	8612.3	1896.7	2223.1	4119.8	466.5	535.4	1001.9	1832053	0.686842	1.04637	3092	1604	4696	1681	2463	4144	7050	6870	13920	4091.5	4023.6	8115.1	3527	3959	7486	2104	1947	4051	10082	11863	21945	11133	12986	24119	11876
OAS30922	1	62.9604	2	26	13	R	4023.2	3724.9	7748.1	198.7	151.9	350.6	4245	4524.7	8769.7	1656.6	1710.1	3366.7	639.9	582.6	1222.5	1475235	0.793392	1.12912	2332	2135	4467	1744	1763	3507	6599	5372	11971	3845.9	4077.8	7923.7	2324	3093	5417	1571	1584	3155	7696	8119	15815	11349	13173	24522	11534
OAS30924	2	68.6516	2	30	20	R	5554	5171	10725	226.2	89.7	315.9	4013.8	4327.6	8341.4	1614.7	1776.2	3390.9	583.7	730.2	1313.9	1541839	0.721791	1.01877	1837	2472	4309	2455	1727	4182	6477	6361	12838	3289	3456	6745	3177	2960	6137	1683	1513	3196	10037	8428	18465	11464	14451	25915	9355
OAS30927	1	46.161	2	30	16	**	9812.1	9062.7	18874.8	321.8	363.5	685.3	3004.2	2918.8	5923	1323.7	1176	2499.7	451.1	377.8	828.9	1265945	0.736121	1.07935	1609	1713	3322	1685	1154	2839	5732	4830	10562	3263.2	3393.1	6656.3	2208	2753	4961	1138	1570	2708	8437	8558	16995	9763	12252	22015	7963
OAS30929	2	84.9593	1	30	20	R	47606.8	43931.1	91537.9	2350.4	2086.1	4436.5	3697.3	3107.4	6804.7	1282.6	1627.9	2910.5	327.1	405.9	733	1750925	0.647285	0.985611	1708	1385	3093	1567	2075	3642	6627	5494	12121	4415.8	4956.7	9372.5	2540	2774	5314	2180	2521	4701	7401	7229	14630	9621	11776	21397	9236
OAS30933	1	67.5426	2	28	14	R	19751.4	18662.4	38413.8	408.4	645.2	1053.6	3517.3	3350.5	6867.8	1240.5	1426.6	2667.1	663.8	642.8	1306.6	1529145	0.681313	0.989655	2491	2283	4774	1768	987	2755	5774	4472	10246	3826.8	3931	7757.8	2196	3047	5243	1878	1768	3646	8669	9350	18019	10836	12539	23375	12434
OAS30935	2	69.6456	1	29	18	R	7042.8	8848.7	15891.5	562.5	623.4	1185.9	4369.2	4390.6	8759.8	1469.4	1491.6	2961	491.5	516.7	1008.2	1666441	0.719614	1.05805	2996	2581	5577	2378	1675	4053	5667	5531	11198	2950.2	3220.2	6170.4	2935	2948	5883	1967	2077	4044	9370	9384	18754	11863	12972	24835	9444
OAS30938	1	61.6444	1	29	18	R	11932.3	11374.5	23306.8	645.3	526.6	1171.9	3350.3	3416.6	6766.9	1201.5	1245.6	2447.1	327.5	391.6	719.1	1391032	0.748621	1.12508	1876	1608	3484	1033	1643	2676	4239	3994	8233	2663.5	2829.1	5492.6	2395	2501	4896	1265	1579	2844	6804	7474	14278	7887	9196	17083	6543
OAS30939	2	88.8545	1	30	18	R	19194.5	20008.7	39203.2	1257.2	1356.2	2613.4	3496.5	3488.8	6985.3	1447.1	1574.1	3021.2	262.3	395.8	658.1	1398267	0.684748	1.00562	1564	1235	2799	893	1996	2889	3992	4791	8783	2509.8	2607	5116.8	2951	4123	7074	1793	2264	4057	7824	7560	15384	10955	8722	19677	7655
OAS30945	1	69.5238	1	29	19	R	20096.2	21375.1	41471.3	350.5	568.4	918.9	3232	3174.5	6406.5	1375.8	1533.6	2909.4	448.1	510.9	959	1454285	0.720969	1.00662	2240	2046	4286	1821	2041	3862	4832	4218	9050	3077.8	3227.3	6305.1	2766	3648	6414	1419	1657	3076	9744	8722	18466	9144	12245	21389	9275
OAS30950	1	65.4649	1	29	18	**	8976	9439.5	18415.5	343.5	671.5	1015	4633.9	4633.8	9267.7	1765.5	1832.2	3597.7	569.8	700.9	1270.7	1652414	0.742645	1.0312	2048	1942	3990	2147	1932	4079	7654	6164	13818	2932.7	3146.5	6079.2	3515	3270	6785	2067	2052	4119	9497	9386	18883	12939	15223	28162	10974
OAS30956	1	57.0177	2	29	18	R	8262.6	9837.3	18099.9	207.5	228.8	436.3	3933.5	4053.4	7986.9	1260.2	1661.6	2921.8	438.8	529.4	968.2	1654176	0.732965	1.04473	2371	2300	4671	1337	1922	3259	6034	5776	11810	3030.5	2845.6	5876.1	4022	3375	7397	1995	1791	3786	10150	8968	19118	10614	12861	23475	12642
OAS30959	2	77.0048	2	30	16	R	9233.9	7736.6	16970.5	342	308.5	650.5	3444.9	3624.1	7069	1384.6	1656.4	3041	419.1	547.2	966.3	1394324	0.744095	1.04941	1846	2230	4076	1886	1564	3450	5001	4100	9101	3084	3091.2	6175.2	2696	3662	6358	1533	1386	2919	8419	8518	16937	9474	11620	21094	9580
OAS30960	1	52.27	2	30	14	R	8471.7	9286.6	17758.3	237	95.2	332.2	3673	3785.5	7458.5	1281.5	1429.7	2711.2	494.9	520.6	1015.5	1432690	0.80069	1.10552	2173	2395	4568	1800	1295	3095	5422	6277	11699	3279.7	3270.2	6549.9	3691	2655	6346	1176	1067	2243	7627	7100	14727	10589	12902	23491	8883
OAS30961	2	73.6922	2	28	16	R	16678.8	18463.7	35142.5	671.6	843.5	1515.1	3860.2	3993.9	7854.1	1767.1	1489.7	3256.8	396	484.3	880.3	1540554	0.723064	1.05693	2306	2190	4496	2363	1734	4097	5392	5053	10445	3340.6	3454.7	6795.3	1948	2559	4507	1228	1656	2884	8452	8809	17261	10779	14178	24957	8190
OAS30962	1	67.0594	2	28	20	R	23401.9	25079.7	48481.6	1132.7	1068.3	2201	4153.7	3617.8	7771.5	1585.8	1519.2	3105	332.8	297.3	630.1	1544940	0.688193	0.995375	1692	1743	3435	1562	2013	3575	5261	5089	10350	3547.2	3700	7247.2	2906	3553	6459	2074	1896	3970	8748	9381	18129	12442	14165	26607	10147
OAS30963	1	48.9405	1	30	16	L	9801.3	11304.9	21106.2	523.4	441.5	964.9	4469.7	3925.6	8395.3	1493.8	1483.2	2977	470.9	608.4	1079.3	1525630	0.767719	1.05944	2103	2277	4380	1390	1682	3072	6980	5998	12978	3150	3137.8	6287.8	3671	3727	7398	1661	1668	3329	8731	8327	17058	12865	11786	24651	9825
OAS30964	2	73.8069	2	30	18	R	12759.8	11009.5	23769.3	522.7	397.4	920.1	3417.1	3672.8	7089.9	1388.6	1591.3	2979.9	381.4	492.9	874.3	1396979	0.716875	1.01608	1539	1673	3212	1846	1662	3508	4946	5309	10255	3305.4	3243.5	6548.9	2491	3166	5657	1369	1640	3009	7956	7740	15696	9075	11377	20452	8429
OAS30966	2	82.1951	1	30	16	R	26606.5	18726.9	45333.4	1330.9	671.8	2002.7	3620.8	3875.7	7496.5	1353.4	1679.8	3033.2	476.4	570.5	1046.9	1685138	0.67478	1.00766	2858	2289	5147	1855	2042	3897	5824	5350	11174	3552.8	3617.8	7170.6	1981	2763	4744	1895	1982	3877	8797	10127	18924	9257	12831	22088	10946
OAS30967	1	69.3421	2	29	17	R	17469	17620.4	35089.4	580	556	1136	3539.5	3364.6	6904.1	1680.6	1772.9	3453.5	313.6	373	686.6	1503102	0.69004	1.034	2060	2267	4327	1725	1794	3519	6003	4831	10834	3596.6	3379.2	6975.8	2186	2885	5071	1384	1430	2814	7471	8411	15882	10298	12823	23121	9760
OAS30968	1	59.8609	2	30	14	R	7357.4	8847.3	16204.7	235	439.6	674.6	3968.3	4153.9	8122.2	1382.2	1401	2783.2	450.5	495.7	946.2	1352719	0.744863	1.03339	1773	1832	3605	1604	1126	2730	4273	4629	8902	2586.4	2629.9	5216.3	2546	3155	5701	1574	1633	3207	9232	7769	17001	9256	11294	20550	8283
OAS30969	1	66.1305	2	30	13	R	11029.7	13318	24347.7	437.3	534.9	972.2	4063.7	4001.4	8065.1	1464.2	1209.6	2673.8	462.8	536	998.8	1440983	0.75047	1.04991	2353	1709	4062	1537	1938	3475	3927	4150	8077	3521.8	3446.3	6968.1	2590	2305	4895	1737	2050	3787	9054	8648	17702	12301	11711	24012	9146
OAS30973	1	81.3605	1	30	18	R	29130.8	23249.6	52380.4	724.6	841.6	1566.2	3301.4	3384.8	6686.2	1305.5	1545.3	2850.8	332.3	462.8	795.1	1639262	0.642391	0.993904	1924	2090	4014	1736	2546	4282	4589	4199	8788	3169.4	3213.7	6383.1	2378	2303	4681	1395	1539	2934	8237	7341	15578	10884	11881	22765	9270
OAS30979	1	69.2916	1	29	18	R	7706	6683.2	14389.2	383.8	490.5	874.3	4144.6	4122.9	8267.5	1642.7	1757.8	3400.5	450.6	540.1	990.7	1605480	0.708681	1.04675	2111	1838	3949	1769	1584	3353	4952	3525	8477	2923.4	3155	6078.4	3220	3440	6660	2301	2015	4316	8349	8471	16820	10219	14649	24868	9723
OAS30981	1	60.0994	2	30	16	R	6521	4662.1	11183.1	178	194.9	372.9	4672.4	4694.9	9367.3	1723.7	1867.2	3590.9	665.8	671.6	1337.4	1627145	0.748049	1.02484	2233	2586	4819	1441	2621	4062	5665	5371	11036	3560.4	3517.6	7078	3832	3736	7568	1990	2124	4114	10526	8845	19371	11024	16400	27424	11824
OAS30982	2	78.9525	2	30	12	R	18134	11696.1	29830.1	883	604.4	1487.4	2951	3108.1	6059.1	1128.3	1212.1	2340.4	373.8	447.8	821.6	1360259	0.68552	1.02595	1497	1389	2886	1561	1393	2954	5172	4670	9842	3559.4	3224.7	6784.1	2777	2816	5593	1474	1719	3193	6708	7377	14085	9468	11806	21274	8927
OAS30985	1	75.2132	2	29	16	R	13771.8	13129.2	26901	442.4	415.6	858	4177.7	4180.6	8358.3	1514.3	1589.4	3103.7	473.1	542.9	1016	1557170	0.703534	0.99161	2207	1889	4096	1460	1718	3178	4801	5391	10192	3394.7	3540	6934.7	2422	2484	4906	2115	2267	4382	9554	10107	19661	12413	13092	25505	9292
OAS30989	1	51.5527	2	30	16	L	4207.4	3440.6	7648	113.5	429.3	542.8	3929.5	4130.8	8060.3	1538.5	1542.4	3080.9	506.2	574.5	1080.7	1559907	0.970834	1.3839	1980	2047	4027	2117	1435	3552	6661	5610	12271	2935.8	2886.3	5822.1	2258	2834	5092	2047	2110	4157	9035	9260	18295	12512	12581	25093	9896
OAS30991	2	77.3943	1	29	19	R	17180.4	14225.7	31406.1	706	504.9	1210.9	3418.2	3582.6	7000.8	1126.9	1333.3	2460.2	364.4	328.8	693.2	1492967	0.64523	0.992193	2050	1503	3553	1578	1672	3250	4503	3652	8155	3021.3	2964.3	5985.6	2294	2577	4871	1725	1649	3374	7602	7346	14948	9157	12240	21397	9560
OAS30992	1	64.5444	2	29	12	R	7065.1	7495.1	14560.2	285.3	172.5	457.8	4014.1	3980.9	7995	1464.4	1415.6	2880	490.6	465.3	955.9	1506841	0.778572	1.16553	2195	2300	4495	2039	1888	3927	5629	5972	11601	3063.9	3253.4	6317.3	2980	3591	6571	1790	2072	3862	10165	10269	20434	10023	13375	23398	10001
OAS30993	1	70.1638	1	30	16	L	12336.1	12486.4	24822.5	760.4	900.8	1661.2	3524.7	3946.7	7471.4	1597.9	1996.1	3594	514.6	581.5	1096.1	1610101	0.697062	0.990228	2268	2246	4514	2289	2264	4553	5711	4891	10602	3298.6	3505.4	6804	2664	2728	5392	2033	1710	3743	9108	8887	17995	8394	11388	19782	9554
OAS30995	1	58.6799	1	30	20	R	11182.7	8691.6	19874.3	388.8	344.8	733.6	4322.6	4149.5	8472.1	1651.2	1668.4	3319.6	647.9	782.4	1430.3	1644432	0.798935	1.13055	2283	2546	4829	2285	2171	4456	5784	5460	11244	3470.5	3544.5	7015	3405	3279	6684	2479	2570	5049	10998	10005	21003	12160	16819	28979	10557
OAS30997	1	59.431	2	30	18	R	4912.9	4622.3	9535.2	221.8	484.4	706.2	4172.8	4209.7	8382.5	1476.5	1515.5	2992	563.8	680.8	1244.6	1483088	0.752061	1.05499	2686	2034	4720	1529	1647	3176	5514	5703	11217	3405.2	3487.3	6892.5	2531	2670	5201	1981	1741	3722	8571	9078	17649	10867	11841	22708	9068
OAS31000	2	78.1199	1	27	13	R	28792.1	18045.2	46837.3	718.4	666.9	1385.3	3840.5	3769.5	7610	1612.4	1659.1	3271.5	513.4	445.1	958.5	1656621	0.70028	1.01808	2266	1725	3991	921	2027	2948	4914	5356	10270	3433.8	3658.6	7092.4	2681	2842	5523	2057	1864	3921	9178	9793	18971	10607	12670	23277	9977
OAS31002	2	83.1089	1	29	18	R	28693	31791.5	60484.5	1767.1	1314.7	3081.8	2709.7	3215.6	5925.3	614.3	1224	1838.3	251.2	395.1	646.3	1836898	0.620067	0.952058	2315	2099	4414	1739	1709	3448	6012	5289	11301	3946.2	3741.1	7687.3	2994	2799	5793	1169	1503	2672	7588	10168	17756	10044	13651	23695	9435
OAS31005	1	63.7433	2	30	18	R	15189.3	11840	27029.3	443.2	557	1000.2	3125.8	3719	6844.8	1274.3	1454.9	2729.2	374.4	389.2	763.6	1481335	0.752623	1.08371	1971	1730	3701	1633	1641	3274	6291	6642	12933	2467.4	2508.7	4976.1	2345	2762	5107	1782	2027	3809	8266	8800	17066	9189	10412	19601	9009
OAS31006	1	68.8232	1	29	18	R	14112.7	10277.4	24390.1	843	869.7	1712.7	3731.7	3894.4	7626.1	1319.2	1717.7	3036.9	340.4	433.9	774.3	1745309	0.691792	1.03914	2162	2489	4651	1620	2107	3727	5655	4322	9977	3965.1	3412.1	7377.2	3114	3464	6578	1787	2193	3980	10059	10080	20139	9543	14756	24299	9090
OAS31007	2	83.5441	1	30	18	R	21695.1	23016	44711.1	880	1014.9	1894.9	2865.3	2836	5701.3	1063	1251.9	2314.9	206.7	255.6	462.3	1309262	0.630652	0.961584	2501	1395	3896	842	1520	2362	4853	3747	8600	2580.9	2460.3	5041.2	2067	2301	4368	1524	1455	2979	6815	6810	13625	9503	11161	20664	8236
OAS31011	1	72.4171	1	29	20	R	27000.3	29540.9	56541.2	1421.2	1011.5	2432.7	3683.1	3522.2	7205.3	1335.7	1886.5	3222.2	465.3	556	1021.3	1733364	0.681996	1.01393	1906	1902	3808	1180	1093	2273	5330	5285	10615	3809.6	3989.7	7799.3	3132	3078	6210	1706	1909	3615	8638	8543	17181	10860	12770	23630	9826
OAS31014	1	65.8393	2	30	20	R	12994.3	15922.4	28916.7	153.4	293	446.4	3899.8	3849.3	7749.1	1540	1685.2	3225.2	562.3	596.2	1158.5	1492444	0.747139	1.06151	2218	1545	3763	1610	1943	3553	4813	5259	10072	3488.1	3440.8	6928.9	3472	3330	6802	1428	1681	3109	9655	9085	18740	10806	10592	21398	9204
OAS31017	1	64.9899	2	28	12	R	5490.4	5263.5	10753.9	403.8	370.7	774.5	4069.2	4356.8	8426	1714	1588.9	3302.9	456	479.6	935.6	1444320	0.803282	1.17258	2251	1879	4130	1325	2004	3329	5341	4156	9497	3405	3531.3	6936.3	2576	2907	5483	1429	2305	3734	8903	9058	17961	12094	14522	26616	8781
OAS31018	1	61.6738	1	28	18	L	10964.3	12731.6	23695.9	354.5	492.9	847.4	4016	4181	8197	1622.4	1687.1	3309.5	418.5	376.9	795.4	1512518	0.728396	1.05947	1736	1738	3474	1319	1963	3282	4424	5485	9909	3059.8	3284	6343.8	3415	4165	7580	2800	1601	4401	9095	9315	18410	9159	12517	21676	10502
OAS31019	1	67.941	2	30	18	R	23442.9	21526.7	44969.6	484.6	522	1006.6	3179.7	3355.4	6535.1	1586	1611.9	3197.9	319.9	391	710.9	1489393	0.74242	1.10665	1839	2188	4027	905	2281	3186	4451	4752	9203	2942.5	2735.3	5677.8	2573	2971	5544	2851	1913	4764	7957	8826	16783	10388	11873	22261	9555
OAS31020	1	64.1605	1	27	16	R	17794.6	15166	32960.6	475.4	578.5	1053.9	4618.1	4598.6	9216.7	1816.6	1875.7	3692.3	469.8	565.9	1035.7	1698809	0.705553	0.997545	1773	2364	4137	1288	2184	3472	6430	5637	12067	3914.9	3676.6	7591.5	3149	3921	7070	2250	1800	4050	9872	9182	19054	12179	13847	26026	12591
OAS31021	1	61.6861	1	30	14	R	8494.9	7806	16300.9	321.4	214.3	535.7	3999.3	4299.8	8299.1	1820.2	1689.3	3509.5	433.6	532.9	966.5	1655733	0.722443	1.01289	2247	2073	4320	1407	2152	3559	7064	5188	12252	3371	3521.8	6892.8	3366	3634	7000	1653	1622	3275	7891	8552	16443	9518	10911	20429	11432
OAS31022	1	79.3171	2	29	18	R	38839.2	34709.4	73548.6	533.3	660.4	1193.7	3567.3	3395.9	6963.2	1123.2	1276.8	2400	322.3	410.2	732.5	1486499	0.687248	0.952495	1650	1887	3537	1153	1501	2654	5092	4178	9270	3544.3	3625.7	7170	2934	2291	5225	1554	1732	3286	8478	7741	16219	7834	11802	19636	8701
OAS31023	1	53.8544	2	30	18	R	6555.6	6206.4	12762	651.2	590.9	1242.1	4441.3	4592.8	9034.1	1465.9	1598.1	3064	415	472.6	887.6	1783227	0.721152	1.04372	2638	2216	4854	1461	2747	4208	8373	7570	15943	3836	3811.7	7647.7	2420	2662	5082	1974	1804	3778	10664	10922	21586	13226	15300	28526	11819
OAS31026	2	79.1194	2	30	16	R	25974	22345.6	48319.6	871.9	1293.4	2165.3	3477.3	3719.6	7196.9	1112.7	1261.7	2374.4	335.5	435.6	771.1	1500071	0.678934	0.961712	2172	1799	3971	1405	1686	3091	5306	5369	10675	2884	2964	5848	2330	2683	5013	1480	2242	3722	8143	8150	16293	10336	13502	23838	9332
OAS31028	1	66.931	2	28	16	R	21971.5	18846.6	40818.1	840.8	584.9	1425.7	3297.9	3194.3	6492.2	1164.4	1274.4	2438.8	326.6	414.6	741.2	1384568	0.68272	0.946559	2119	1694	3813	2174	1378	3552	4839	4767	9606	3147.8	3142	6289.8	2233	2478	4711	1542	2190	3732	7978	8761	16739	9113	10297	19410	9625
OAS31031	1	60.4216	2	29	18	R	14194.9	17365.7	31560.6	463.9	402	865.9	4027.7	4090.7	8118.4	1388	1450	2838	455.4	539.9	995.3	1491189	0.762063	1.06077	1749	1560	3309	1358	2303	3661	4319	5281	9600	2948.6	3107.6	6056.2	3491	2795	6286	1647	1583	3230	7925	8489	16414	11188	9921	21109	9960
OAS31032	1	71.026	2	27	18	L	11200.6	11174.8	22375.4	471.7	273.5	745.2	3235	3525.7	6760.7	1104.9	1341.9	2446.8	414.5	495.7	910.2	1429560	0.729936	1.04092	1933	1721	3654	1566	1817	3383	4793	3861	8654	3233.1	3292.6	6525.7	2786	3034	5820	1444	2082	3526	6991	7990	14981	10619	12844	23463	8049
OAS31036	1	83.0655	1	24	12	R	19162.6	24269.5	43432.1	833.5	879.5	1713	4112	4042.3	8154.3	1451.2	1630.5	3081.7	382.7	435.5	818.2	1649387	0.703916	1.02329	2342	1856	4198	1864	1138	3002	5193	4999	10192	3282	3434.6	6716.6	2333	2982	5315	2325	1885	4210	10648	10401	21049	9771	13899	23670	11402
OAS31037	2	73.9091	2	29	14	R	12206.4	10231.5	22437.9	611.1	484.8	1095.9	3842.9	4018.3	7861.2	1620.6	1641.4	3262	489.4	521.2	1010.6	1417544	0.709589	1.00994	1759	1969	3728	1464	2239	3703	5289	4926	10215	3020.4	2918.2	5938.6	2587	2899	5486	1710	1921	3631	8305	6557	14862	9504	12827	22331	8935
OAS31040	1	59.006	2	29	16	R	10811.5	11302.5	22114	423	525.5	948.5	3844.2	3756.6	7600.8	1562	1890.9	3452.9	526.4	660.7	1187.1	1535634	0.778773	1.13313	2286	1597	3883	1648	1413	3061	5217	5180	10397	3373.9	3554.7	6928.6	2985	3548	6533	2422	2461	4883	9161	9524	18685	9057	10644	19701	8802
OAS31045	2	72.8184	2	30	16	R	13493.4	16146	29639.4	733.6	895.2	1628.8	3416	3046.5	6462.5	1358.9	1082.3	2441.2	277.6	256.7	534.3	1433917	0.65748	0.994383	1583	1862	3445	1898	1471	3369	5227	5169	10396	2751.7	2844.2	5595.9	2505	3182	5687	2189	1643	3832	9512	7525	17037	8250	10029	18279	9040
OAS31047	1	67.8581	2	28	18	R	9456.2	7517.2	16973.4	307.9	528.1	836	3960.6	3975.5	7936.1	1596.7	1493.9	3090.6	488.7	570.6	1059.3	1345763	0.778568	1.04568	1764	1917	3681	1323	1860	3183	5222	4693	9915	3328.8	3395.5	6724.3	3045	3441	6486	2057	2050	4107	9189	8164	17353	9658	11284	20942	8865
OAS31048	1	56.4988	1	26	16	R	10163.2	8659.2	18822.4	476.6	459.2	935.8	3747	4102.4	7849.4	1916	1872.5	3788.5	487	491.4	978.4	1613634	0.723417	0.993612	2294	2255	4549	2024	1667	3691	5771	5730	11501	2917.5	3047.1	5964.6	3454	3343	6797	2178	1643	3821	8807	8475	17282	10070	12923	22993	9084
OAS31056	2	72.809	1	25	12	R	16020.5	18665	34685.5	903.8	823.7	1727.5	3865.5	3916.2	7781.7	1706.8	1583.2	3290	432.3	447.9	880.2	1625001	0.687104	1.0125	1746	1870	3616	1544	1769	3313	6067	5878	11945	2701.9	2967.9	5669.8	3028	3780	6808	1552	1550	3102	8656	7587	16243	9251	13884	23135	8972
OAS31065	1	49.1444	1	29	12	R	17822.1	14721.4	32543.5	468.3	430.8	899.1	3719.9	3521.1	7241	1518.1	1661.2	3179.3	481.8	551	1032.8	1617034	0.673361	1.0038	1934	2754	4688	1922	2112	4034	5057	4380	9437	3582.5	3356.4	6938.9	2209	2637	4846	2081	1390	3471	9400	8173	17573	10896	12992	23888	9077
OAS31066	1	63.2338	2	29	13	R	5585.9	5865.9	11451.8	269.2	202.5	471.7	3996.1	3980.7	7976.8	1537.1	1479.4	3016.5	411	531.9	942.9	1471103	0.748275	1.02519	1684	1810	3494	1040	1718	2758	5542	5271	10813	2954.6	2935.6	5890.2	2707	3004	5711	1851	1570	3421	7947	8055	16002	10782	13048	23830	9471
OAS31069	1	61.1794	2	27	14	R	6049	4533	10582	306.9	397.7	704.6	3647.7	3921.3	7569	1635.6	1650.4	3286	485.6	565	1050.6	1519582	0.793052	1.16938	1993	1994	3987	2175	2154	4329	5379	5357	10736	2860	3042.6	5902.6	3232	3607	6839	2540	2385	4925	8561	8333	16894	10737	12779	23516	11111
OAS31070	1	57.8232	2	29	14	R	8225.2	5315.8	13541	264.1	511.8	775.9	4159.1	4240.8	8399.9	1629.3	1529.3	3158.6	558.5	548.8	1107.3	1470224	0.750768	1.02296	1965	1837	3802	2275	1438	3713	5077	5460	10537	3306.5	3561.6	6868.1	2991	3537	6528	1397	2333	3730	8716	8348	17064	8969	12872	21841	8776
OAS31071	2	74.1388	1	30	16	R	22261.5	20425.1	42686.6	838.6	482.5	1321.1	3559.1	3746.9	7306	1323.3	2076.7	3400	463.9	453.1	917	1735988	0.6676	0.974321	1915	1941	3856	1805	2160	3965	6471	6365	12836	3321.4	3624.6	6946	3164	3849	7013	1971	1829	3800	9887	9738	19625	10291	14017	24308	12259
OAS31073	1	66.1142	1	28	16	R	4904.3	5894.7	10799	311.8	323.1	634.9	4494.5	4498.5	8993	2042.5	2164.4	4206.9	714.6	789.4	1504	1793244	0.723166	1.04965	2255	2389	4644	1190	1838	3028	6136	5055	11191	3672.3	3735.3	7407.6	3155	3408	6563	2525	1933	4458	10120	10502	20622	12900	15707	28607	12314
OAS31075	2	68.4792	2	28	18	R	10522	8225.9	18747.9	802.6	556.6	1359.2	2631.3	2884.9	5516.2	908.1	960.5	1868.6	323.5	399.5	723	1313313	0.705335	1.1179	1271	1422	2693	1378	1414	2792	4094	3937	8031	2562.6	2716.4	5279	2232	2319	4551	1084	1279	2363	6034	6977	13011	7830	9148	16978	6298
OAS31076	1	72.7271	1	29	19	R	16900.6	17027.9	33928.5	1130.7	998.1	2128.8	3148.9	3236.2	6385.1	1262.1	1521.8	2783.9	335.8	446	781.8	1420717	0.680795	0.982426	1612	1662	3274	2068	1666	3734	5033	4537	9570	3102	3011.2	6113.2	2477	2514	4991	2440	2561	5001	7555	7689	15244	8536	9709	18245	7903
OAS31077	1	82.8587	2	27	15	R	15036.2	15312.6	30348.8	657.4	735	1392.4	3901.5	3506.7	7408.2	1399.8	1357.2	2757	329.7	405.6	735.3	1493254	0.662846	1.01019	1853	1989	3842	1476	2179	3655	6247	5459	11706	3794	3777.8	7571.8	2099	2247	4346	2588	1427	4015	7728	8253	15981	10427	11614	22041	9527
OAS31078	1	52.225	2	30	14	R	3937.1	3610.8	7547.9	256.3	126.7	383	3654.9	3894.2	7549.1	1460.8	1424.7	2885.5	491.9	540.3	1032.2	1427613	0.835064	1.2008	1921	1946	3867	1775	1634	3409	4798	3683	8481	2933.5	3276.1	6209.6	2498	2954	5452	1663	1856	3519	10068	8485	18553	10611	12577	23188	9663
OAS31081	1	48.1782	2	30	18	L	4987.2	4973.2	9960.4	131	143.9	274.9	4028	3921.5	7949.5	1275.5	1401	2676.5	471	472	943	1438539	0.748007	1.03535	2052	1731	3783	1373	1851	3224	5570	4428	9998	3182.7	3225.3	6408	2686	2370	5056	1753	1741	3494	8021	7045	15066	9591	12189	21780	9948
OAS31083	1	74.3427	2	30	16	R	14543.6	12542	27085.6	713.9	684.6	1398.5	3648.5	3620.6	7269.1	1227.9	1398	2625.9	433.7	470.3	904	1475710	0.683096	1.04468	2644	1982	4626	2192	1812	4004	5643	4817	10460	3245.3	4051.7	7297	2409	3010	5419	1713	1725	3438	8255	7878	16133	10819	12854	23673	9147
OAS31085	2	83.361	1	29	17	R	28521.5	19316	47837.5	1479.3	779.2	2258.5	3589.5	3706.3	7295.8	1395	1646.3	3041.3	400	440	840	1643472	0.659727	0.987101	1775	2400	4175	1229	2387	3616	6782	5223	12005	3502.1	3395.6	6897.7	3769	3650	7419	1440	1592	3032	7740	7337	15077	9203	14213	23416	9891
OAS31087	1	57.9265	1	30	19	R	8615.7	8035	16650.7	485.4	317.6	803	4533	4844.2	9377.2	1759.7	1843	3602.7	557	565.2	1122.2	1701293	0.74808	1.10653	2786	1579	4365	1767	1927	3694	5993	4474	10467	3549.1	3517.2	7066.3	2992	3811	6803	2046	2398	4444	8622	10283	18905	12364	12712	25076	9923
OAS31093	2	82.4249	2	26	14	R	21912.9	18858.4	40771.3	1568.7	1207.5	2776.2	3043.2	3088.7	6131.9	1146.9	1241.5	2388.4	256.6	304.6	561.2	1484193	0.667377	0.969714	1926	1760	3686	1079	1531	2610	6351	4875	11226	3387.2	2935.6	6322.8	3383	4481	7864	1384	1181	2565	6857	6174	13031	8572	9634	18206	6404
OAS31094	1	64.306	2	27	16	R	2581.5	2530.9	5112.4	158.3	114.7	273	3019.7	3276.8	6296.5	1121.8	1100.7	2222.5	353.3	478.4	831.7	1113723	0.748337	1.03524	1497	1384	2881	1610	1571	3181	3673	3806	7479	2440.4	2530.4	4970.8	2236	2918	5154	1536	1714	3250	6498	6470	12968	6826	8996	15822	7293
OAS31099	1	46.4488	2	29	14	R	8700.9	5378.9	14079.8	137.9	345.2	483.1	3709.6	3909.4	7619	1488.7	1685.5	3174.2	522.5	543.3	1065.8	1595122	0.745867	1.06518	1828	2002	3830	1402	2690	4092	7515	6476	13991	3305.4	3534.7	6840.1	2398	2701	5099	1686	1875	3561	9115	8267	17382	10818	13283	24101	12095
OAS31101	1	68.991	2	30	20	R	16968.5	15705.2	32673.7	262.2	208.8	471	3629.5	3494	7123.5	1185.8	1214.9	2400.7	438.9	384.5	823.4	1514810	0.680716	1.02709	1875	1962	3837	1222	1308	2530	4971	4623	9594	3022.1	3362.3	6384.4	2237	2563	4800	1774	1776	3550	8423	7531	15954	8986	12621	21607	8866
OAS31103	1	55.962	2	29	16	R	8560.7	11106.8	19667.5	220.1	227.2	447.3	3458.3	3152.8	6611.1	1213.5	1407.6	2621.1	389	482.3	871.3	1409398	0.77778	1.09861	2269	1348	3617	1521	1524	3045	4392	6110	10502	3341.5	3459.6	6801.1	4058	3548	7606	1118	1262	2380	7921	9084	17005	9424	9506	18930	7968
OAS31106	1	67.4005	2	30	14	R	6029.4	5377.9	11407.3	266.2	268.5	534.7	3495.2	3613.1	7108.3	1315.9	1356.6	2672.5	436.2	446.8	883	1304670	0.738496	1.06639	1412	1825	3237	1883	1775	3658	5597	4283	9880	2939.3	3081.7	6021	2794	2987	5781	1642	1996	3638	7850	6832	14682	7646	10943	18589	8256
OAS31110	1	66.8961	1	30	20	R	26035.8	21268.1	47303.9	1266.8	934.9	2201.7	4131.4	4149.9	8281.3	1621.8	1602.9	3224.7	484.7	438	922.7	1909535	0.700137	1.02835	2564	2377	4941	2319	1647	3966	5819	5523	11342	3253.6	3384.2	6637.8	3108	3107	6215	2241	2116	4357	10716	11144	21860	11961	14706	26667	12552
OAS31113	1	69.3616	2	30	15	R	8769.9	8472.5	17242.4	400.4	259.1	659.5	3531.4	3969	7500.4	1551.4	1589.6	3141	353	523.6	876.6	1528776	0.730508	1.06286	1680	2029	3709	1181	1687	2868	5563	4263	9826	3282.6	3257.3	6539.9	2788	3197	5985	2260	1676	3936	7988	8603	16591	9821	12338	22159	9338
OAS31117	1	64.9527	1	30	20	L	9081.6	10080.8	19162.4	446.5	506.6	953.1	3632.1	3702.5	7334.6	1491.7	1726.4	3218.1	504.5	617.1	1121.6	1711554	0.759854	1.04705	2387	2034	4421	1259	1511	2770	5568	5599	11167	3814	3814.5	7628.5	2835	3569	6404	1893	2090	3983	10341	11369	21710	10657	12274	22931	8923
OAS31118	1	62.1921	2	30	20	R	11535.8	8055	19590.8	260.6	456.6	717.2	3862.5	4246.5	8109	1891.7	1663.3	3555	506.9	663.3	1170.2	1557103	0.74378	1.07027	1577	1844	3421	1381	2064	3445	7360	5690	13050	3369.7	3570.4	6940.1	2672	3659	6331	1647	1761	3408	9620	8803	18423	9383	15091	24474	11190
OAS31119	1	53.4216	1	30	16	R	7089.9	8064.3	15154.2	1131.3	384.1	1515.4	4072.7	4137.7	8210.4	1654.4	1725.7	3380.1	434.2	540.1	974.3	1647065	0.734312	1.04528	2157	2161	4318	2083	2112	4195	6278	6781	13059	3544.4	3653.2	7197.6	3272	3599	6871	2667	2004	4671	10309	10823	21132	11947	15364	27311	11717
OAS31120	1	63.5804	2	29	14	R	23860	15469.2	39329.2	1415.4	1023.9	2439.3	3363.9	3408.7	6772.6	1391	1455.9	2846.9	372.8	412.1	784.9	1391317	0.696721	1.04372	1837	1657	3494	1405	1310	2715	5063	4294	9357	3096.9	3038.8	6135.7	2890	3022	5912	1432	1374	2806	8314	8496	16810	8202	9986	18188	7647
OAS31125	1	71.9161	2	29	12	R	13631.9	14827.9	28459.8	463.3	559.7	1023	3773	3706.5	7479.5	1250.6	1434.1	2684.7	376	439	815	1554362	0.73874	1.10891	1912	2128	4040	1307	1465	2772	6069	4368	10437	2794.7	2851.8	5646.5	2934	3065	5999	2090	1812	3902	7650	7170	14820	9380	12157	21537	8412
OAS31126	2	74.5998	1	26	12	R	11259.8	9321.5	20581.3	585.6	491.9	1077.5	3862.6	4078.4	7941	1564.9	1679.9	3244.8	451	484.1	935.1	1518238	0.698257	0.99186	2065	1734	3799	1741	1768	3509	4657	5031	9688	3565.8	3556	7121.8	2643	2458	5101	2195	2334	4529	9609	9333	18942	9362	11130	20492	8609
OAS31131	1	65.5504	1	30	18	R	19541.5	19696.8	39238.3	862.9	825.2	1688.1	3764.8	4174.3	7939.1	1856.3	2036.5	3892.8	609.8	595.8	1205.6	1601780	0.725877	0.998458	2402	1808	4210	1643	1783	3426	5864	3823	9687	3877.4	3818.1	7695.5	2689	3470	6159	2177	1891	4068	10130	9912	20042	11654	12758	24412	11561
OAS31133	1	70.93	1	30	19	L	11226.1	9144.4	20370.5	733.6	317.9	1051.5	4450.8	3954.8	8405.6	2032.2	1833.9	3866.1	599.1	655.5	1254.6	1757586	0.792476	1.08601	2637	1843	4480	1868	2088	3956	5225	5401	10626	3859.3	3695.5	7554.8	2968	3206	6174	2245	1994	4239	10759	11031	21790	13868	15844	29712	13435
OAS31136	1	67.2232	1	28	16	R	8052.4	8255.2	16307.6	497.9	566.3	1064.2	3612.5	3523.8	7136.3	1381.6	1285.2	2666.8	493.5	394.1	887.6	1411281	0.705657	1.03034	1857	1628	3485	1585	1184	2769	3953	4509	8462	3086.6	3198.2	6284.8	2364	3159	5523	1460	1662	3122	7238	7337	14575	9294	11794	21088	8895
OAS31139	2	85.23	1	26	16	R	21876.9	23520.7	45397.6	1212.6	983.4	2196	3368.2	3257.8	6626	1030.8	1151.5	2182.3	221.5	356.5	578	1544480	0.62667	1.00284	1783	2109	3892	1344	2418	3762	5552	5441	10993	3021.1	2810.8	5831.9	2855	3348	6203	2149	1270	3419	8676	9865	18541	8582	10970	19552	8766
OAS31142	1	67.96	1	30	16	R	5600.1	5754.5	11354.6	151.4	153.3	304.7	3297.3	3127	6424.3	1308.8	1391.7	2700.5	519.3	641.5	1160.8	1413562	0.726733	1.02693	2266	1664	3930	1844	970	2814	5052	6547	11599	3217.8	3203.7	6421.5	2539	2347	4886	1344	1284	2628	7456	7077	14533	11076	10478	21554	8650
OAS31143	1	79.9727	2	28	16	R	13058.8	10296.7	23355.5	244	343.5	587.5	3297.5	3726.7	7024.2	1018.2	1187.7	2205.9	299.1	344.9	644	1293187	0.69241	0.958158	2064	1627	3691	1560	1710	3270	4698	5413	10111	2760.2	2690.1	5450.3	2538	3188	5726	1588	1622	3210	7715	8163	15878	8845	10503	19348	7819
OAS31146	1	68.1727	2	30	16	R	8493.8	9086.7	17580.5	386.6	317.4	704	3754	3672.8	7426.8	1660.1	1740.6	3400.7	414.2	607.6	1021.8	1478978	0.752015	1.1262	1705	2003	3708	1269	1582	2851	5538	5376	10914	3118.9	3188.4	6307.3	2809	2827	5636	1427	1753	3180	7234	7044	14278	7512	12598	20110	8768
OAS31147	1	56.2782	1	29	16	L	10587.6	8828.1	19415.7	298.6	363.5	662.1	4794.7	4962.4	9757.1	1921.9	2187.9	4109.8	539.9	572.1	1112	1825484	0.795593	1.07653	2033	3151	5184	1508	2797	4305	5912	5136	11048	3588.2	3741.5	7329.7	4505	3769	8274	2898	2377	5275	12436	12291	24727	12129	14758	26887	12812
OAS31149	1	75.7294	2	28	15	L	10657.7	9478.4	20136.1	375.3	423.1	798.4	3919.6	3844.1	7763.7	1603.7	1501.6	3105.3	460	381.9	841.9	1416234	0.730217	1.02154	2086	1696	3782	1563	1435	2998	5190	4738	9928	2863.2	3190.5	6053.7	2702	3211	5913	1897	2122	4019	8057	8284	16341	10216	11751	21967	9046
OAS31151	2	88.4288	2	26	12	L	8197.4	7315.9	15513.3	364.2	268.5	632.7	2534.4	2940.6	5475	875.1	1069	1944.1	284.5	368.4	652.9	1255883	0.655729	0.981515	1734	1762	3496	1595	1922	3517	4050	3748	7798	3336.3	3661.3	6997.6	2430	2982	5412	973	1735	2708	8747	7527	16274	9604	10468	20072	7798
OAS31158	1	67.4805	1	29	13	R	3943.7	3765.4	7709.1	230.7	529	759.7	3796.6	3750.1	7546.7	1625.7	1602.1	3227.8	380.9	552.6	933.5	1420355	0.731954	1.0276	2133	1924	4057	1764	2293	4057	6281	4747	11028	2508.5	2591.5	5100	2481	2853	5334	1889	1789	3678	9229	8939	18168	10815	14068	24883	8508
OAS31159	1	73.4355	2	29	12	R	13269.9	15140.2	28410.1	548	587	1135	4012.3	3913.3	7925.6	1730.2	1606.2	3336.4	496.9	573.5	1070.4	1470990	0.684381	0.995963	1689	1696	3385	1475	1799	3274	4368	4624	8992	3585.3	3464.6	7049.9	2445	2782	5227	1642	1686	3328	8528	7826	16354	8697	12388	21085	9535
OAS31161	1	62.8255	2	29	16	R	15267.8	15760.8	31028.6	369	541.7	910.7	3981.8	3997.8	7979.6	1740.2	1507.5	3247.7	413.2	546.9	960.1	1492365	0.701936	1.00966	1457	1772	3229	1299	1885	3184	6004	4703	10707	3058.4	2910.9	5969.3	2467	2753	5220	2013	2079	4092	7268	8752	16020	12073	13092	25165	11809
OAS31168	1	65.6309	1	30	16	L	13214.1	11024.7	24238.8	870.2	595.7	1465.9	3798.1	4340.9	8139	1648.6	1751.5	3400.1	493.9	592.8	1086.7	1678963	0.70623	1.03734	2029	2126	4155	1567	1896	3463	6103	4234	10337	4004.6	3949.4	7954	2670	3154	5824	2191	2494	4685	10401	10437	20838	10661	15482	26143	12069
OAS31169	2	64.7315	2	27	16	R	30649.5	32764.6	63414.1	1567.2	1142.4	2709.6	3363	3377.5	6740.5	1392	1411.3	2803.3	323.8	400	723.8	1685386	0.690497	1.03225	1708	2021	3729	1546	2486	4032	6648	5175	11823	2883.4	3125.1	6008.5	2666	2959	5625	1725	1649	3374	8359	8615	16974	9686	12581	22267	7982
OAS31175	1	69.4016	1	29	16	R	12476.7	12499.7	24976.4	359.1	239.4	598.5	4277.1	4165.5	8442.6	1708.2	1755.4	3463.6	615.2	597.9	1213.1	1738997	0.795712	1.17344	2465	2197	4662	1672	2596	4268	6747	7604	14351	3711.7	3658.3	7370	2466	3015	5481	1737	1770	3507	12090	9645	21735	14017	16310	30327	9505
OAS31176	1	62.5893	2	29	16	R	11693.7	11409.9	23103.6	320.9	305.3	626.2	3627.7	3801.1	7428.8	1630.8	1608.8	3239.6	605.2	718.3	1323.5	1507349	0.749075	1.03273	2329	1950	4279	1586	2612	4198	5639	4681	10320	3657.1	3853.2	7510.3	2704	2775	5479	1675	1570	3245	7714	7506	15220	11175	13684	24859	9851
OAS31177	1	75.7911	1	30	19	R	23987.8	24070.5	48058.3	639.4	963.3	1602.7	3981.2	3962.7	7943.9	1369.3	1371.2	2740.5	520.4	538.3	1058.7	1823546	0.709048	0.981904	2188	2494	4682	1552	2348	3900	9138	8039	17177	4126.1	4138.8	8264.9	3778	4219	7997	1522	1446	2968	8523	9818	18341	12144	16857	29001	12387
OAS31180	1	63.627	2	30	18	L	18191	17277	35468	698.4	800.4	1498.8	3724.4	3436.2	7160.6	1378.2	1373.3	2751.5	394.8	364.4	759.2	1387463	0.721194	1.05103	2287	1885	4172	1284	1846	3130	4778	3243	8021	2766.5	2848	5614.5	2472	2721	5193	2132	2087	4219	9763	8171	17934	9716	11901	21617	9258
OAS31184	1	67.3155	1	30	18	R	23262.1	18237.3	41499.4	697	534.8	1231.8	3376.4	3364.7	6741.1	1479.9	1589.6	3069.5	373.6	420.1	793.7	1520319	0.71108	0.975303	2324	2030	4354	1005	1969	2974	5342	4364	9706	3259.1	3432.9	6692	2621	2828	5449	1727	1899	3626	8618	10182	18800	10381	12460	22841	10754
OAS31186	1	54.0032	1	30	14	L	18506.9	13086	31592.9	376.3	390.6	766.9	3757.1	3816	7573.1	1680.6	1633.3	3313.9	425.1	516.9	942	1792781	0.727648	1.06593	2442	2462	4904	1333	2769	4102	6374	6557	12931	3252.6	3404.2	6656.8	2654	2586	5240	1429	2071	3500	13780	11446	25226	11090	16898	27988	11241
OAS31188	1	71.3449	2	30	15	R	8874.1	5684.7	14558.8	199.3	344.8	544.1	4576.5	4853.3	9429.8	1790.5	1668.2	3458.7	575.4	548.9	1124.3	1591980	0.733713	1.06496	2549	2194	4743	1771	2185	3956	4721	4217	8938	2945.1	3267.2	6212.3	2134	2625	4759	1947	2090	4037	9655	9126	18781	12085	12930	25015	10538
OAS31189	1	65.391	2	30	18	R	11568.6	11097	22665.6	327.3	397.5	724.8	4107.8	4105.9	8213.7	1457.9	1480.8	2938.7	492.8	538.2	1031	1603277	0.714587	1.03863	1899	2088	3987	1745	1612	3357	6077	5376	11453	2939.2	2998.9	5938.1	2142	2305	4447	1920	2407	4327	11154	10453	21607	9994	12763	22757	10438
OAS31192	1	72.53	2	30	20	R	15498.7	11739.3	27238	613.6	325.8	939.4	3907.8	4155.3	8063.1	1341.1	1645.6	2986.7	470.7	595.6	1066.3	1456072	0.678095	0.995958	1695	1641	3336	1744	1769	3513	5240	4212	9452	3604.1	3718.7	7322.8	2967	2995	5962	2034	1866	3900	8859	8930	17789	9185	12749	21934	8588
OAS31195	1	69.0221	1	29	14	L	19598.9	14078.3	33677.2	609.9	507	1116.9	4420.1	4770.6	9190.7	1773.7	2101.3	3875	459.9	609.5	1069.4	1806175	0.710698	0.996804	2668	1974	4642	1494	1937	3431	6455	10667	17122	3476.8	3727.4	7204.2	3838	4434	8272	2572	2172	4744	9746	10084	19830	12888	16601	29489	13559
OAS31196	1	70.2548	2	30	16	R	14269.8	13443.3	27713.1	783.7	625.7	1409.4	3430.6	3550.2	6980.8	1400.5	1350.8	2751.3	410.3	507.7	918	1384811	0.717528	0.988458	2096	1986	4082	1945	2377	4322	5479	5182	10661	3192.5	3402	6594.5	2237	2708	4945	1807	1968	3775	8958	7872	16830	10162	13397	23559	9759
OAS31197	1	70.717	2	28	15	R	10674.7	10393.9	21068.6	418.2	326.4	744.6	3861.9	4086.1	7948	1586.9	1460.6	3047.5	453.4	535.4	988.8	1493572	0.74097	1.01212	2079	1720	3799	2020	1534	3554	5196	5454	10650	3100.5	3002.9	6103.4	3626	3910	7536	2260	1794	4054	8600	8757	17357	9931	10943	20874	10076
OAS31198	1	71.0004	1	30	16	R	16794.7	16035.2	32829.9	996.7	948.9	1945.6	4168.8	3976.4	8145.2	1695.3	1787.7	3483	405.1	494.2	899.3	1509576	0.761143	1.0273	1758	1657	3415	1324	2420	3744	6633	6437	13070	3373.9	3375.6	6749.5	2958	3769	6727	1592	1786	3378	8159	9150	17309	10075	14652	24727	10117
OAS31199	1	50.5282	1	30	12	R	9396.9	15531	24927.9	223.7	295.1	518.8	4546.5	4527.9	9074.4	2197.1	2224.8	4421.9	774.6	843.2	1617.8	1913330	0.970213	1.35563	3680	1704	5384	2240	2196	4436	6446	5660	12106	3990	4335.8	8325.8	3288	3246	6534	1627	2146	3773	10451	10288	20739	12568	16084	28652	10121
OAS31202	1	74.1694	1	27	18	R	6803.3	6782.4	13585.7	277.2	371.4	648.6	4417.4	4685.6	9103	1737.9	1757.5	3495.4	551.2	587.7	1138.9	1724316	0.762525	1.05789	2134	2110	4244	2693	1517	4210	6409	7125	13534	3358.9	3486.3	6845.2	2740	3183	5923	2437	2156	4593	9811	10148	19959	10470	13728	24198	10017
OAS31204	1	68.8667	2	30	17	R	8645.2	7895.7	16540.9	632.8	425.8	1058.6	3728.4	3916.9	7645.3	1793.7	2148.9	3942.6	520.6	628.9	1149.5	1547651	0.706433	1.00266	1576	1854	3430	1537	2004	3541	4698	5164	9862	3702.4	3819.2	7521.6	2976	2907	5883	2132	2052	4184	9336	9036	18372	8594	12471	21065	11101
OAS31205	1	67.0838	2	30	18	R	10009.8	8260.5	18270.3	294.2	205.7	499.9	4063.2	4226.4	8289.6	1461.9	1648	3109.9	413.8	361.8	775.6	1370643	0.72961	1.04146	1611	1997	3608	1680	1201	2881	5304	4771	10075	3122	3049.1	6171.1	2599	2897	5496	1740	1589	3329	7468	7127	14595	8539	8765	17304	8409
OAS31207	1	66.7661	1	30	18	R	10556.6	10704	21260.6	388.7	372.2	760.9	3726.4	4027.9	7754.3	1769.3	1836	3605.3	449.5	421.6	871.1	1553948	0.714215	1.01756	1701	1592	3293	1331	1842	3173	3979	3324	7303	2952.6	3237.4	6190	3199	3810	7009	1298	1369	2667	8988	9476	18464	10259	12595	22854	9605
OAS31208	1	62.831	2	29	18	R	6580.3	5729.2	12309.5	269.9	346.3	616.2	3789.4	3852.2	7641.6	1580.5	1832.7	3413.2	430	418.3	848.3	1385586	0.757131	1.05907	1990	1780	3770	1467	1628	3095	4259	4679	8938	2714.2	2826.6	5540.8	3153	3876	7029	1769	1632	3401	8700	8387	17087	8931	11397	20328	9016
OAS31209	1	66.2238	1	29	16	L	23886.1	24030.8	47916.9	994.1	770.9	1765	4059	4242.2	8301.2	1553.6	1834.8	3388.4	553.6	603.9	1157.5	1760139	0.73417	1.02949	2734	2108	4842	1360	2415	3775	7012	4694	11706	3415.1	3561.1	6976.2	3630	3776	7406	1663	1796	3459	9121	9809	18930	12807	16360	29167	11422
OAS31210	1	68.3077	2	28	14	R	20924.3	16797.2	37721.5	1481.8	712.4	2194.2	3900.7	4023.9	7924.6	1661.9	1725.4	3387.3	328.7	329.6	658.3	1565499	0.698392	1.10432	2107	1628	3735	1888	1400	3288	5792	4432	10224	2797.8	3284.9	6082.7	2281	2325	4606	2079	1851	3930	9113	7676	16789	8910	11263	20173	9377
OAS31211	1	65.2926	2	30	12	R	14040.4	11560.4	25600.8	591.5	405.1	996.6	3626.9	3600.8	7227.7	1375.7	1426.7	2802.4	376.1	379.6	755.7	1467457	0.75797	1.16587	2287	1913	4200	1053	1474	2527	4274	3734	8008	2508.2	2688.8	5197	2292	2680	4972	2359	1777	4136	7498	8414	15912	9921	11897	21818	9375
OAS31213	1	63.8165	2	30	16	R	9990.9	8801.3	18792.2	413.4	769.6	1183	4465.9	4353	8818.9	1728.5	1747	3475.5	616.8	608	1224.8	1685404	0.708428	1.00148	2628	2296	4924	2255	2038	4293	5737	7337	13074	3651.4	4101	7752.4	3490	3881	7371	1477	1795	3272	9780	9657	19437	11494	14335	25829	11646
OAS31215	1	82.2749	2	29	19	R	19372.5	14807.3	34179.8	664.9	403.4	1068.3	3096.9	3441	6537.9	1313.5	1533.3	2846.8	428.9	450	878.9	1475401	0.672709	1.03953	1668	1672	3340	1229	1650	2879	5249	5481	10730	2916.3	3040.5	5956.8	3197	3304	6501	1688	1540	3228	10060	8001	18061	8195	9487	17682	6821
OAS31218	1	74.966	2	29	18	R	11778.7	10509	22287.7	874.2	742.9	1617.1	2524.2	2905.1	5429.3	1009.9	1455.6	2465.5	332.5	389.9	722.4	1293372	0.689235	0.973596	1655	1699	3354	1388	1108	2496	4787	4446	9233	2510.7	2716.6	5227.3	3154	3106	6260	1049	1380	2429	7329	6698	14027	7667	8888	16555	7455
OAS31219	1	45.9721	1	30	16	R	7738.4	9424.7	17163.1	283.8	574.5	858.3	4750.4	4960.3	9710.7	1905.2	2064.2	3969.4	741.7	774.6	1516.3	1794702	0.763016	1.03287	2147	2708	4855	1596	2723	4319	5408	4864	10272	3871.1	4118.1	7989.2	3465	3984	7449	2313	2030	4343	13043	10694	23737	12442	16676	29118	14353
OAS31220	1	70.3277	1	28	17	R	11459.2	10085.7	21544.9	644.3	574.4	1218.7	3852.3	3776.6	7628.9	2005.2	1554.9	3560.1	621.8	639	1260.8	1567531	0.709871	1.01286	2002	2257	4259	1160	1391	2551	4888	5384	10272	3838.2	3850.9	7689.1	2860	3315	6175	1425	1574	2999	7581	8368	15949	9674	14235	23909	9303
OAS31224	1	64.7921	2	26	18	R	13997.6	11871.6	25869.2	424.4	321.7	746.1	3489	3458.9	6947.9	1561.6	1646.3	3207.9	510.6	664.9	1175.5	1455582	0.750286	1.01924	2875	1747	4622	1125	1889	3014	6094	4939	11033	3188	3027.6	6215.6	2903	2799	5702	1609	1391	3000	8026	9210	17236	9849	13924	23773	9663
OAS31226	1	74.8049	1	30	18	R	34107	33544.7	67651.7	1012.1	1117.2	2129.3	3729.2	3868.8	7598	1437	1721.8	3158.8	596.9	548	1144.9	1778455	0.676332	1.04456	1916	2246	4162	1032	1311	2343	5267	4452	9719	3293.7	2876.6	6170.3	2941	3778	6719	1422	1731	3153	9169	8809	17978	10610	13133	23743	9557
OAS31227	1	77.7288	1	30	18	R	39447.2	34819.7	74266.9	1752.1	1592.2	3344.3	3962.2	4373.7	8335.9	1916.3	1969.8	3886.1	518.7	703.3	1222	1963756	0.727913	1.01406	2124	2731	4855	1826	1970	3796	7068	6268	13336	3549.2	3550.1	7099.3	2891	4601	7492	2873	2352	5225	9988	10871	20859	12137	17472	29609	12434
OAS31231	1	75.1872	1	30	18	R	30450.4	31717.1	62167.5	933	1163.9	2096.9	3647.6	3315.9	6963.5	1528.9	1318.4	2847.3	422.4	508	930.4	1645111	0.680266	0.993842	2282	1836	4118	1184	1561	2745	4720	4979	9699	4236.7	4036.8	8273.5	2603	2780	5383	2258	1983	4241	9158	8598	17756	9949	13088	23037	10094
OAS31232	1	60.2543	2	30	18	R	5138.2	4246.8	9385	339.8	299.7	639.5	3954.7	3954.1	7908.8	1851.6	1738.3	3589.9	511.2	613.5	1124.7	1356759	0.751418	1.10304	1975	2314	4289	1504	1561	3065	4676	6133	10809	2976	2758.9	5734.9	2374	2928	5302	1866	2059	3925	7380	8807	16187	9027	10702	19729	9616
OAS31235	1	60.1999	2	30	16	R	8448.6	7780.1	16228.7	536.4	309.5	845.9	4582.9	4347.1	8930	1680	1800.3	3480.3	507.2	630.7	1137.9	1563334	0.748756	1.07945	2163	2226	4389	1697	2250	3947	5209	5559	10768	3137.4	3340.7	6478.1	2629	3251	5880	2201	1551	3752	8105	8624	16729	9410	13473	22883	9372
OAS31236	1	70.2333	1	27	12	L	7076.5	5628.6	12705.1	216.2	489.1	705.3	3264	3545.6	6809.6	1480.5	1478.8	2959.3	443.6	459.5	903.1	1358333	0.713599	1.05301	1984	1723	3707	1215	1833	3048	5292	4001	9293	2758.3	2668	5426.3	2273	2489	4762	1687	1630	3317	8786	8049	16835	8905	12059	20964	8171
OAS31237	1	48.4876	2	30	20	R	10033.2	8187.2	18220.4	341.3	201.8	543.1	4702.8	4651.9	9354.7	1770.7	1492.3	3263	621	283.3	904.3	1652121	0.649941	1.07092	2743	1559	4302	1103	1810	2913	6092	3717	9809	3034.4	3440	6474.4	3057	4410	7467	1459	1836	3295	6595	6766	13361	10431	11850	22281	8821
OAS31238	1	75.4883	2	30	18	R	8485.9	9167.9	17653.8	283.6	396.4	680	3929.3	4018	7947.3	1149.8	1239.2	2389	318.4	336.9	655.3	1573999	0.754255	1.16474	2051	1785	3836	1612	1310	2922	5397	4218	9615	4195.8	4331.6	8527.4	2431	2900	5331	1557	1202	2759	8704	8656	17360	10934	12413	23347	8246
OAS31240	1	62.6899	1	30	20	R	20185.7	18714.9	38900.6	391.1	545.7	936.8	3785.7	3790.1	7575.8	1638.5	1838.7	3477.2	598.3	668.1	1266.4	1700076	0.7409	1.01241	2035	2246	4281	1584	1959	3543	4698	6115	10813	2900.5	3064.7	5965.2	2938	3136	6074	2151	2094	4245	10911	11749	22660	12858	12875	25733	10621
OAS31241	1	73.7116	2	29	16	R	11040.5	14567.2	25607.7	483.7	506.4	990.1	3409.8	3267	6676.8	1438.7	1324.5	2763.2	358	373.6	731.6	1443679	0.711815	1.0392	2447	1456	3903	1284	1627	2911	6134	5717	11851	2787.9	3356.3	6144.2	3179	4180	7359	1760	1789	3549	8831	9152	17983	9488	11207	20695	9807
OAS31242	1	70.6082	1	30	18	L	10419.5	10711.8	21131.3	609.2	1231.8	1841	4837.1	5119	9956.1	1700.3	1890.9	3591.2	545	586.8	1131.8	1624819	0.733472	1.0498	2131	2353	4484	1900	1693	3593	6216	5372	11588	4865.1	5098	9963.1	2421	2925	5346	2170	2043	4213	9399	8761	18160	9989	13811	23800	10220
OAS31243	1	66.0905	2	30	16	R	8399.9	8564	16963.9	293.6	421.6	715.2	3729.1	3628.5	7357.6	1269.1	1453.1	2722.2	374.6	456	830.6	1431296	0.90632	1.37975	2035	2084	4119	1254	1729	2983	4807	4354	9161	3263.7	3228.8	6492.5	2198	2132	4330	1476	1573	3049	7748	6979	14727	8221	9675	17896	8680
OAS31246	1	55.6065	2	30	18	R	9863.2	12135.3	21998.5	408.7	355.2	763.9	4000.5	3608.4	7608.9	1504.8	1604.1	3108.9	501	468	969	1388684	0.734441	1.0572	1677	1848	3525	1457	1757	3214	4711	3982	8693	2958.1	2999	5957.1	2583	3204	5787	1327	1671	2998	8216	7480	15696	10333	10933	21266	10035
OAS31247	1	73.9654	2	30	19	R	26970.6	28539.2	55509.8	757.5	969.2	1726.7	3401.3	3677	7078.3	1680.2	1686.7	3366.9	351.5	404.2	755.7	1596440	0.707222	1.05416	1365	1643	3008	1300	1804	3104	5598	4919	10517	3328.8	3512.8	6841.6	2805	3024	5829	1358	1874	3232	7532	9949	17481	11776	9997	21773	9997
OAS31249	1	78.3149	1	30	20	R	26299.6	17834.4	44134	613.8	878.9	1492.7	3686.4	3745.5	7431.9	1539.6	1648.3	3187.9	435.6	538.3	973.9	1613954	0.681802	1.02358	2002	1490	3492	911	1419	2330	5784	4824	10608	3687.3	3923.7	7611	2076	2948	5024	1643	1937	3580	9565	8875	18440	9168	11588	20756	9668
OAS31250	1	50.8931	2	30	20	R	6750.5	5533.6	12284.1	622.2	610.5	1232.7	4023.9	4261.7	8285.6	1544.3	1766.5	3310.8	603.3	595.3	1198.6	1493745	0.846545	1.17972	1988	2017	4005	1310	2944	4254	6448	6879	13327	3892.4	3979.4	7871.8	2888	3150	6038	2125	1643	3768	9343	9112	18455	10002	12861	22863	8637
OAS31251	1	91.617	1	29	16	R	16210.3	18684.3	34894.6	1609.7	1308.1	2917.8	3487.6	3685	7172.6	1010.8	1645.9	2656.7	331.5	517.1	848.6	1596094	0.655884	1.01758	1976	1982	3958	2116	1795	3911	5434	4724	10158	2581	2301.6	4882.6	2486	2564	5050	1932	1918	3850	7731	8560	16291	10281	12284	22565	8883
OAS31252	1	65.4338	2	30	16	L	6020.8	4571.2	10592	279.4	633	912.4	4102.8	4280.4	8383.2	1633.6	1767.9	3401.5	488	546.5	1034.5	1545125	0.757769	1.07823	1603	1693	3296	1532	1941	3473	7015	3899	10914	3662.8	3677.1	7339.9	3364	3754	7118	1944	1852	3796	9376	8240	17616	8947	12551	21498	10890
OAS31255	1	74.0677	2	30	14	R	35719.3	35061	70780.3	1696.2	1675.4	3371.6	3728.9	3772.6	7501.5	1723.9	1860.4	3584.3	387.1	327	714.1	1627348	0.689834	1.02853	1834	1792	3626	499	1545	2044	6047	5653	11700	3267.9	3461.7	6729.6	2050	2910	4960	1874	1785	3659	8758	9219	17977	9085	10828	19913	11159
OAS31257	1	81.4593	2	29	18	R	20494.6	19028.9	39523.5	557.8	434.9	992.7	3192.8	3520.4	6713.2	1291.6	1217	2508.6	277.2	388.9	666.1	1388625	0.687901	0.958298	1840	1988	3828	1226	1484	2710	4911	4177	9088	2898	2997.7	5895.7	2035	2597	4632	1360	1578	2938	7643	6373	14016	8463	10577	19040	8861
OAS31260	1	71.2632	1	30	16	R	9672.2	7682.3	17354.5	622.6	331.1	953.7	4018.6	4141.5	8160.1	1595.7	1685.2	3280.9	390.6	623.5	1014.1	1524054	0.733621	1.05005	1811	2270	4081	1510	2007	3517	5528	4912	10440	3393.4	3189.3	6582.7	2977	3507	6484	1740	1702	3442	10317	10158	20475	9864	11597	21461	10560
OAS31261	1	70.2438	1	28	18	R	21358.8	23870.8	45229.6	524.4	539.2	1063.6	4268.8	4246.2	8515	1574.8	1749.2	3324	343	536.8	879.8	1688938	0.721039	1.00448	2176	2013	4189	1488	2164	3652	6306	7830	14136	3946.4	3668.7	7615.1	3263	3267	6530	3770	3135	6905	8512	9638	18150	10313	14217	24530	10890
OAS31263	1	65.1016	1	28	20	R	16757.5	15872.5	32630	728.3	923.7	1652	4402.7	4454.9	8857.6	1861.1	2099.9	3961	516	636.2	1152.2	1720990	0.767382	1.07995	2011	1962	3973	1772	1354	3126	6697	4486	11183	3585.7	3646.2	7231.9	3505	3935	7440	1974	2141	4115	10307	9889	20196	10636	12300	22936	13086
OAS31265	1	73.8977	2	29	18	R	5994.1	4578.5	10572.6	239.3	671.7	911	3064.1	2959.2	6023.3	1139.9	1095.4	2235.3	404.1	416	820.1	1317852	0.878141	1.27774	1582	1314	2896	1261	1791	3052	4432	4521	8953	3370.5	3654	7024.5	2332	3121	5453	1152	1009	2161	7245	7180	14425	8454	9828	18282	7508
OAS31267	1	71.3299	2	28	14	R	5952.5	5966.3	11918.8	495.1	393.8	888.9	3633	3735.6	7368.6	1388.1	1557.6	2945.7	469	538.1	1007.1	1304089	0.715959	1.01792	1808	1582	3390	1293	1564	2857	4569	3912	8481	3613.7	3776.5	7390.2	2284	2806	5090	1324	1391	2715	8040	7540	15580	9400	11142	20542	7373
OAS31269	1	63.8761	2	30	16	R	13656.4	13065.2	26721.6	645.8	475.5	1121.3	3452.2	3365.4	6817.6	1584.9	1432.3	3017.2	513.7	463.3	977	1507071	0.719733	1.1029	1841	1617	3458	1130	1494	2624	4832	4327	9159	3463.9	3659	7122.9	1928	1920	3848	1730	1404	3134	7735	7443	15178	8925	10224	19149	7156
OAS31272	1	75.7811	2	30	18	L	16711	13570.2	30281.2	500.3	553.4	1053.7	3833.8	4007.3	7841.1	1613.5	1588.6	3202.1	414.4	374.6	789	1515981	0.674489	1.0185	1924	1813	3737	1521	1688	3209	6593	5817	12410	2998.7	3210.8	6209.5	2743	3182	5925	1373	1549	2922	7617	8181	15798	7782	12049	19831	9118
OAS31273	1	79.5744	2	30	16	R	16503.5	12296.1	28799.6	516.3	648.3	1164.6	3720.1	3689.3	7409.4	1395.3	1451.6	2846.9	412.8	419.8	832.6	1522267	0.722505	1.01917	2140	1927	4067	1703	1584	3287	5454	6125	11579	3318.3	3195.7	6514	2632	2526	5158	1525	1779	3304	8087	7809	15896	10124	11487	21611	11746
OAS31274	1	74.011	1	29	18	R	35042	30614.7	65656.7	1085.3	1265.5	2350.8	3619.7	3566.1	7185.8	1402.4	1826.9	3229.3	326.7	475.3	802	1752971	0.684334	1.02184	1835	2097	3932	1376	1455	2831	6121	6470	12591	4979.6	4082.7	9062.3	2939	2802	5741	1594	1432	3026	8967	7768	16735	10965	13163	24128	9568
OAS31276	1	77.3844	2	27	13	R	18097.7	18868.7	36966.4	1238.9	761	1999.9	3180.5	3164.1	6344.6	1308.6	1313.9	2622.5	342.5	324.6	667.1	1262390	0.70854	1.02453	1331	1294	2625	1676	1626	3302	4135	4036	8171	2747.5	2755.6	5503.1	1918	2773	4691	1442	1620	3062	6018	7182	13200	7345	8278	15623	7859
OAS31277	1	75.0432	2	29	13	R	27364.4	15904.4	43268.8	810	452.6	1262.6	3861.3	4469.5	8330.8	1776.4	1718	3494.4	417.2	428.7	845.9	1631076	0.76491	1.11467	2655	2176	4831	1761	2212	3973	5783	3963	9746	4223.7	4221.5	8445.2	2539	2620	5159	1328	1632	2960	8412	8291	16703	10254	12624	22878	10051
OAS31278	1	68.8954	2	26	13	R	6097.1	4870.2	10967.3	339.2	188.6	527.8	3632.7	3969.3	7602	1444.8	1919.8	3364.6	443.7	503.9	947.6	1409643	0.859966	1.29067	2378	2121	4499	1928	1709	3637	3393	3755	7148	2584.2	2810.7	5394.9	1967	2755	4722	1607	1511	3118	8121	6260	14381	8825	12943	21768	8959
OAS31279	1	74.4655	1	29	16	R	11392.4	12576.8	23969.2	625.9	654.2	1280.1	3959.5	3701.1	7660.6	1630.7	1459.7	3090.4	436.4	435.4	871.8	1571607	0.696337	1.05273	2164	2146	4310	1444	1887	3331	5439	5129	10568	3112.6	3226.4	6339	2643	3231	5874	2063	1851	3914	9000	8783	17783	8383	11731	20114	8856
OAS31280	1	70.7944	2	30	18	R	9108.3	7626.1	16734.4	283.2	256.1	539.3	3422.8	3619.1	7041.9	1381.2	1430.5	2811.7	399.5	486.9	886.4	1217383	0.730936	1.03596	1856	1652	3508	1533	1696	3229	4347	3991	8338	2854.4	2854.6	5709	2250	2385	4635	1499	1551	3050	7430	6451	13881	9326	10369	19695	7677
OAS31282	1	69.65	1	30	18	R	12610.5	11722.4	24332.9	673.7	621.6	1295.3	3922.3	4162.8	8085.1	1457.1	1491.9	2949	414.2	461.6	875.8	1689967	0.714807	1.02123	3243	2106	5349	1735	1079	2814	5642	5387	11029	2568.9	3054.7	5623.6	2438	2796	5234	1764	1670	3434	11046	9664	20710	10733	14182	24915	10529
OAS31284	1	74.7849	2	29	18	R	22856.1	15167.5	38023.6	1013.4	1133.6	2147	3232.6	3850.2	7082.8	1292.2	1506.4	2798.6	297.9	439.1	737	1633955	0.711796	1.14438	1687	1481	3168	2058	1057	3115	5314	6260	11574	2927.8	2939.4	5867.2	3064	4004	7068	1481	1560	3041	8777	8432	17209	9618	10529	20147	8897
OAS31285	1	56.1727	1	30	12	R	19353.9	17658	37011.9	656.5	932.9	1589.4	4360.5	4589.3	8949.8	1585.8	1801.2	3387	458.3	492	950.3	1565247	0.687538	1.00649	1924	2364	4288	1220	1064	2284	5205	4408	9613	3474.1	3634.9	7109	3094	3290	6384	1880	2249	4129	9941	9280	19221	11281	12981	24262	9876
OAS31286	1	72.461	1	30	18	R	24692.9	17663.3	42356.2	781.3	598.6	1379.9	3570.7	4008.4	7579.1	1432.8	1621.3	3054.1	525.9	580.2	1106.1	1655753	0.648991	0.990212	1411	1717	3128	1533	1982	3515	5085	5207	10292	3485.8	3439.4	6925.2	3156	3856	7012	2453	1794	4247	7373	6959	14332	8883	11988	20871	10929
OAS31288	1	73.0443	1	29	16	R	12132.1	14040.7	26172.8	468.6	537.2	1005.8	3763.6	4000.3	7763.9	1615.7	1720.1	3335.8	383.8	503.4	887.2	1548530	0.713726	1.0393	1597	2025	3622	2035	1768	3803	6681	5089	11770	3186.2	3280.2	6466.4	4230	4653	8883	1543	1654	3197	10694	11015	21709	8256	12775	21031	9258
OAS31293	1	66.4532	1	30	16	R	14366.7	11438.4	25805.1	509.3	361.2	870.5	3997.4	4591.2	8588.6	1641.4	2030.3	3671.7	488.6	596	1084.6	1673167	0.737998	1.06473	2101	2126	4227	1987	1161	3148	6100	5077	11177	3160.1	3461	6621.1	5170	4399	9569	1489	1660	3149	9992	9637	19629	12166	13090	25256	11952
OAS31294	1	71.1783	1	30	20	R	12539.8	12364.5	24904.3	368.6	336.3	704.9	3746.2	3940.3	7686.5	1367.3	1671.5	3038.8	464.9	498.7	963.6	1595787	0.721469	1.06051	1947	1736	3683	1655	1734	3389	5717	4640	10357	3324.4	3304.8	6629.2	2572	2792	5364	2009	2012	4021	8512	7957	16469	10192	10572	20764	10238
OAS31295	2	62.666	1	29	16	R	9341	7115.2	16456.2	187.5	286.8	474.3	3937.4	4170.6	8108	1531.3	1769.5	3300.8	534.4	718.8	1253.2	1646157	0.759444	1.03794	3221	2325	5546	2048	1469	3517	5761	5078	10839	3060.4	2973.3	6033.7	2924	3944	6868	2231	1980	4211	11800	9803	21603	11623	14129	25752	10014
OAS31297	1	73.8172	1	26	16	L	26657.8	21464.4	48122.2	1340.4	1504.6	2845	3914.3	4044.2	7958.5	1821.6	2202.7	4024.3	497.4	616.6	1114	1572329	0.683336	0.994046	2123	1724	3847	1639	1994	3633	6753	6241	12994	3254.2	3539	6793.2	2623	2482	5105	2106	1971	4077	8023	8288	16311	8659	12183	20842	9398
OAS31299	1	61.3894	1	30	19	R	10918	10212.6	21130.6	392.2	236	628.2	4813.7	5044.7	9858.4	2097.7	2454.8	4552.5	710.7	822.6	1533.3	1888228	0.736171	1.03356	2576	3166	5742	2618	2557	5175	7309	7177	14486	3500.9	4006.8	7507.7	2887	2827	5714	2545	2510	5055	11263	11690	22953	15433	16240	31673	12781
OAS31301	1	66.896	2	28	15	R	9730.2	9725.1	19455.3	346.3	409.1	755.4	3759.6	3667.8	7427.4	1670.3	1703.4	3373.7	531	573.6	1104.6	1547115	0.811928	1.13314	1833	1689	3522	1063	1551	2614	5686	6362	12048	3447	3488.8	6935.8	4159	3837	7996	1261	1402	2663	8125	7877	16002	9884	13592	23476	9035
OAS31302	1	69.4955	2	30	16	R	15950.7	11898.4	27849.1	884.1	575.4	1459.5	3435.3	3838.2	7273.5	1629.5	1691.4	3320.9	371.1	424.3	795.4	1366280	0.725169	0.995092	1895	1973	3868	1212	1730	2942	4637	4835	9472	3522.8	3636.1	7158.9	3013	3132	6145	1973	1938	3911	8283	8584	16867	11727	15094	26821	9676
OAS31303	1	76.5717	1	29	17	R	58580	62646	121226	1167.2	1054.9	2222.1	4051.3	4315.3	8366.6	1704.4	1851.2	3555.6	363.2	498.7	861.9	1994268	0.72433	1.04	1825	2012	3837	1838	1158	2996	6551	8225	14776	3758.6	3879.7	7638.3	2863	3065	5928	1738	1990	3728	9621	10754	20375	11571	12563	24134	12655
OAS31305	1	55.491	1	30	14	R	12270.4	9798.3	22068.7	808.1	542.5	1350.6	4392.5	4485.7	8878.2	1837.5	2024.6	3862.1	525.7	546.2	1071.9	1907080	0.726016	1.03518	2595	2408	5003	1922	1893	3815	6542	4884	11426	3195.6	3430.3	6625.9	2272	2614	4886	2480	2148	4628	10155	9443	19598	13509	15103	28612	13663
OAS31307	1	68.9938	2	30	18	R	9401.4	8493.6	17895	474.8	334.1	808.9	3828.8	3771.4	7600.2	1727.9	1486.4	3214.3	463.4	552.8	1016.2	1570906	0.725082	1.05947	2061	1547	3608	2008	1842	3850	5579	5624	11203	3150.6	2975	6125.6	3046	3591	6637	1788	2466	4254	10135	9519	19654	7571	11871	19442	8731
OAS31308	1	85.4582	1	30	20	R	45816.2	34783.9	80600.1	1670.9	1414.7	3085.6	4084.6	4281	8365.6	1416.2	1469.8	2886	310.5	345.8	656.3	1812060	0.674313	0.991224	2128	1540	3668	2041	1451	3492	6621	5203	11824	3608.7	3481	7089.7	2792	2813	5605	2016	2124	4140	9371	9775	19146	9940	11056	20996	12083
OAS31310	1	70.5377	1	27	16	R	19197.9	18302.4	37500.3	946.6	408.7	1355.3	4007.4	3733	7740.4	1537.3	1553.5	3090.8	478.8	611	1089.8	1898866	0.727065	1.15193	1942	2719	4661	1446	2321	3767	5683	6105	11788	3610.7	3750.7	7361.4	2222	3123	5345	2802	1758	4560	10746	10253	20999	14437	17665	32102	12217
OAS31311	1	76.5627	2	30	18	L	45199.6	45613.5	90813.1	1435.6	1854	3289.6	3287.9	3481.8	6769.7	1436.4	1710.4	3146.8	303.6	449.8	753.4	1539839	0.676803	0.977508	1584	1545	3129	1704	1711	3415	5909	5566	11475	3154.1	2931.6	6085.7	3421	3241	6662	1554	1328	2882	8078	7162	15240	8033	11680	19713	8197
OAS31312	1	70.1443	2	28	12	R	12938	11950.9	24888.9	306	284.4	590.4	4381.2	4406.8	8788	1351.4	1647.4	2998.8	418.5	329.3	747.8	1484780	0.646625	0.987999	1784	1709	3493	1332	1597	2929	5805	4647	10452	3318.1	3546.9	6865	2310	2140	4450	1524	1964	3488	6956	6952	13908	10764	12702	23466	7391
OAS31313	1	66.3705	1	27	12	R	7413.3	7289.4	14702.7	195.8	318	513.8	3870.1	3984.3	7854.4	1341.1	1401.1	2742.2	468.2	506.7	974.9	1429115	0.625478	1.01747	1135	1416	2551	1251	1814	3065	4120	3142	7262	3187.1	2488.7	5675.8	2395	2855	5250	1872	1200	3072	7611	8294	15905	8762	11144	19906	8504
OAS31315	1	67.9371	1	29	14	R	11407.4	10094.4	21501.8	546.8	345.4	892.2	3946.2	4317.2	8263.4	1677.2	1724.4	3401.6	435.1	525.1	960.2	1528026	0.752664	1.06898	2190	1700	3890	1342	2218	3560	5649	5114	10763	3074.2	3266.6	6340.8	2067	3274	5341	1751	2044	3795	9821	10965	20786	9579	13336	22915	10511
OAS31316	1	53.9794	2	30	18	R	6553.5	5975	12528.5	299	260.5	559.5	4014.3	3955.7	7970	1601.8	1768.3	3370.1	468.6	562.7	1031.3	1427589	0.767563	1.06621	2559	2146	4705	916	1347	2263	4176	3880	8056	3280.4	3578.6	6859	2679	3236	5915	1859	1583	3442	8528	9179	17707	11026	13839	24865	10052
OAS31317	1	72.4138	1	29	18	R	14930.5	16506	31436.5	438.3	383.6	821.9	4552.9	4659.7	9212.6	1531.5	1872	3403.5	409.8	455.2	865	1859021	0.720325	1.10567	2373	1869	4242	2252	2152	4404	5604	6098	11702	3647	4237.8	7884.8	3436	3541	6977	2317	2453	4770	10495	10273	20768	11058	12637	23695	11681
OAS31318	1	59.8704	1	27	12	R	11753.2	11769.2	23522.4	422.6	546.9	969.5	3676.4	3892.4	7568.8	1384.8	1557.3	2942.1	432.6	490.6	923.2	1498774	0.699047	1.03373	2020	2148	4168	1401	2018	3419	4702	5149	9851	3179.7	3257.2	6436.9	3060	2924	5984	1445	1673	3118	8793	9555	18348	10047	12745	22792	9882
OAS31319	1	78.8083	1	29	18	L	24078.9	20333	44411.9	1130.3	1435.5	2565.8	4182.3	3643.8	7826.1	1726	1621.6	3347.6	357.6	432.2	789.8	1680721	0.715867	1.02855	2849	2694	5543	2137	1475	3612	6203	5027	11230	3504.5	3582.6	7087.1	2167	2632	4799	2470	1647	4117	10152	9959	20111	10179	14871	25050	10833
OAS31320	1	75.66	2	28	16	R	16898.2	15544.8	32443	529.4	533.6	1063	3511.4	3695.5	7206.9	1451.4	1754.1	3205.5	415.6	596.5	1012.1	1483362	0.679068	1.01516	2226	2257	4483	1247	1572	2819	5594	6552	12146	2994.6	3131.4	6126	2688	2765	5453	1274	1849	3123	8537	7432	15969	11287	11509	22796	9051
OAS31321	1	69.2922	2	30	14	R	12069.6	10432.2	22501.8	336.7	264.9	601.6	3507.2	3554.6	7061.8	1244.9	1236.2	2481.1	371.7	359.9	731.6	1311789	0.699959	0.995731	1828	1597	3425	1145	1576	2721	4766	4326	9092	3046.4	3138.2	6184.6	2267	2908	5175	1478	1167	2645	6437	6158	12595	8653	11079	19732	7583
OAS31322	1	67.6516	1	30	18	R	11805.3	8976.5	20781.8	537.4	420.8	958.2	4176.5	4093.1	8269.6	1741.2	1680	3421.2	493.8	669	1162.8	1630683	0.726233	1.07461	1873	1432	3305	1291	1522	2813	4703	4451	9154	3543.7	3486.6	7030.3	3325	4012	7337	2081	3161	5242	10213	9294	19507	10650	12254	22904	10195
OAS31323	2	79.7415	1	30	17	R	18156.8	21275.3	39432.1	542.3	551.2	1093.5	3702.9	3647.9	7350.8	1364.2	1583.1	2947.3	358.8	479.3	838.1	1496797	0.664773	0.960695	1823	1838	3661	1353	1707	3060	5154	4485	9639	4433.5	4483.2	8916.7	3001	2455	5456	1913	1765	3678	8248	6943	15191	7747	10393	18140	9962
OAS31325	2	83.3488	2	29	18	R	21907.2	16192.5	38099.7	811.6	765.6	1577.2	3092.6	3465.8	6558.4	1117.8	1255	2372.8	272.4	341.5	613.9	1519632	0.697439	1.05602	1862	1299	3161	1202	1489	2691	5640	4558	10198	2720.4	2910.7	5631.1	2596	2865	5461	1914	2025	3939	8966	9148	18114	9713	10598	20311	7150
OAS31326	1	59.7977	2	28	12	R	8731.9	8654	17385.9	336.7	382.7	719.4	3842.3	4056.6	7898.9	1565.3	1727.7	3293	488.9	507.5	996.4	1557588	0.744696	1.02308	2412	1871	4283	1518	1461	2979	5461	4509	9970	4244.7	4173.5	8418.2	2889	3199	6088	2007	1652	3659	9224	9328	18552	9637	13316	22953	9179
OAS31327	1	66.6522	1	30	18	B	14073.1	14799.9	28873	510.6	619.2	1129.8	3911.6	4075.6	7987.2	1847.6	1947.4	3795	528.9	638.3	1167.2	1590471	0.747516	1.0251	1735	1730	3465	1143	1936	3079	4265	5158	9423	3285.9	3325.5	6611.4	3494	3595	7089	1691	1607	3298	9163	10858	20021	11533	13156	24689	11771
OAS31329	1	69.9104	2	30	17	R	13806.6	17841.5	31648.1	266.2	507.5	773.7	4172.9	4124.2	8297.1	1430.5	1595.5	3026	431.8	484.7	916.5	1565641	0.717342	1.01199	1820	1867	3687	2397	1667	4064	5990	5853	11843	3154.7	3325.7	6480.4	2568	3193	5761	1275	1820	3095	9200	9360	18560	12990	14138	27128	13148
OAS31331	1	66.2959	1	29	18	R	16352.5	15404.5	31757	704.8	619.5	1324.3	3861.8	3794.8	7656.6	1674.2	1895.7	3569.9	470.2	434.5	904.7	1569860	0.703943	1.0224	1886	1772	3658	1582	1761	3343	5394	4300	9694	2547.7	2746.9	5294.6	3799	3462	7261	1949	1932	3881	10565	9820	20385	9104	15865	24969	8659
OAS31333	1	68.1739	1	30	18	R	8259.7	10844.4	19104.1	294	280.5	574.5	4499.1	4331	8830.1	2043	2013.4	4056.4	451.4	575.1	1026.5	1646709	0.77984	1.13896	2787	2063	4850	1828	1912	3740	5904	6159	12063	3001.2	3140.6	6141.8	2755	3156	5911	1963	1926	3889	9435	10027	19462	10181	12691	22872	11103
OAS31335	1	66.6154	1	29	19	R	25374.1	18929.9	44304	912.8	734.1	1646.9	3349.6	3466.3	6815.9	1513.5	1725.2	3238.7	264.4	385.4	649.8	1609472	0.682956	1.01177	1386	1632	3018	2135	1557	3692	6064	5039	11103	3312.1	3387.9	6700	2478	2584	5062	1887	1710	3597	10087	8712	18799	10493	14820	25313	10549
OAS31336	1	77.0787	1	28	13	R	14414.6	16305.3	30719.9	1310.5	1116.1	2426.6	3973.5	3943.1	7916.6	1530.4	1496.3	3026.7	393.1	467.2	860.3	1492165	0.677355	1.02786	1578	1776	3354	1151	1676	2827	4916	4278	9194	3116.7	3482	6598.7	2346	2577	4923	2395	1829	4224	8920	8228	17148	9114	12485	21599	8200
OAS31337	1	90.1989	2	29	14	R	29794.6	26712.1	56506.7	1122.3	979.3	2101.6	3016.9	3231	6247.9	1101.8	1544.5	2646.3	226.9	297.5	524.4	1347000	0.706076	0.967216	1589	1272	2861	1324	1446	2770	5055	4439	9494	3822.3	3396.7	7219	2474	2999	5473	1333	1440	2773	7768	7255	15023	6813	8776	15589	6848
OAS31338	1	50.0627	2	30	20	R	8787.6	6615.5	15403.1	162.6	276.3	438.9	4419.3	4649.1	9068.4	1814.2	1856.3	3670.5	601.8	685.5	1287.3	1634475	0.772419	1.08845	2859	2179	5038	1961	1388	3349	6879	5049	11928	3732.1	3906.4	7638.5	3260	3356	6616	1604	1460	3064	10058	10722	20780	10965	16053	27018	10774
OAS31339	1	55.9348	1	30	20	R	15358.7	12036.9	27395.6	410.9	301.7	712.6	4642.4	4617.7	9260.1	1921.4	2165.4	4086.8	418.4	565.5	983.9	1803743	0.709706	1.06235	2459	2384	4843	1655	3131	4786	7805	5218	13023	3625.1	3333.1	6958.2	3086	3840	6926	1925	2084	4009	9285	10794	20079	11926	15212	27138	11845
OAS31342	1	63.7693	1	28	18	L	14925.6	13323.4	28249	396.6	488.6	885.2	4596.6	4409.4	9006	1800.9	1946.7	3747.6	567.3	536.6	1103.9	1563877	0.68699	0.987599	2371	2324	4695	2176	1869	4045	4679	5136	9815	3005.7	3106.8	6112.5	2723	3457	6180	1585	2032	3617	9941	9989	19930	11433	12965	24398	10795
OAS31344	2	71.8853	2	28	20	R	14980	16383.2	31363.2	434.3	474.8	909.1	4105	3970.4	8075.4	1743.2	1844.1	3587.3	557.1	620.3	1177.4	1643081	0.729118	1.00335	2017	1902	3919	1796	1980	3776	6336	5608	11944	4099.1	4033.7	8132.8	2319	2959	5278	2285	1666	3951	9815	8983	18798	9689	13135	22824	8835
OAS31345	1	55.9644	2	30	18	R	6097.2	6097	12194.2	155.4	268.3	423.7	3663.1	3711.9	7375	1524.9	1557.3	3082.2	507.2	626.3	1133.5	1333122	0.946354	1.31867	1899	1708	3607	1537	1355	2892	6926	5397	12323	3340.4	3418.4	6758.8	3461	3192	6653	1423	1813	3236	8122	8318	16440	9781	10994	20775	8443
OAS31346	1	71.331	2	30	16	R	13882.2	12994.9	26877.1	481	431.3	912.3	3921.3	3775.6	7696.9	1608.3	1584.6	3192.9	383.1	523.3	906.4	1443719	0.691522	1.01741	2055	1937	3992	1969	1782	3751	4627	5107	9734	3011.7	3349.9	6361.6	2256	2287	4543	1592	1787	3379	8722	7293	16015	10584	11931	22515	9262
OAS31349	1	79.2133	1	27	24	R	30425	28722.7	59147.7	1066.3	773.3	1839.6	3491.5	4558	8049.5	1476.2	1939.7	3415.9	310	467.9	777.9	1773207	0.651035	1.0034	2265	2514	4779	1866	1527	3393	7147	6447	13594	4190.3	3538.9	7729.2	2366	4247	6613	2400	1635	4035	8386	8935	17321	12048	15331	27379	10894
OAS31350	1	73.6233	1	30	18	R	17250.6	20791.9	38042.5	817.6	1057	1874.6	4072.7	3700.3	7773	1444.6	1514.2	2958.8	329.9	414.7	744.6	1462682	0.694169	1.00257	1873	1797	3670	1233	1757	2990	4245	4502	8747	2985.8	3123.7	6109.5	3263	3846	7109	1812	2385	4197	8065	8100	16165	9184	10724	19908	9892
OAS31352	1	70.2037	2	30	16	R	12520.5	8261.2	20781.7	427.8	582.4	1010.2	3688.8	4345	8033.8	1431.7	1684.2	3115.9	387.3	501	888.3	1384060	0.740651	1.01604	1985	2014	3999	1037	1954	2991	4705	3880	8585	2567.3	2621.4	5188.7	2812	3068	5880	1262	1904	3166	9509	8881	18390	10152	10579	20731	10010
OAS31354	1	67.426	1	30	16	R	13543.8	11906.7	25450.5	578.2	238.8	817	3411.8	3830.7	7242.5	1175.8	1557.2	2733	440.1	499.3	939.4	1549767	0.705924	0.995976	1562	1877	3439	2291	1739	4030	5834	5255	11089	3610.1	3500.6	7110.7	2451	2799	5250	1651	1827	3478	9794	7770	17564	8075	13053	21128	7701
OAS31356	1	70.8327	1	30	20	R	17002.3	13847.9	30850.2	945.4	966.4	1911.8	3783.3	3689.8	7473.1	1720.3	1780.5	3500.8	426.5	434.2	860.7	1449934	0.740114	1.04739	1995	1726	3721	1294	2050	3344	5051	4094	9145	3914.7	4098.7	8013.4	2835	3005	5840	1803	1906	3709	7585	9172	16757	8727	12642	21369	9146
OAS31360	1	71.7787	2	25	12	R	15465.8	14149.5	29615.3	539.1	576.7	1115.8	3716.7	3719.2	7435.9	1451.2	1669.6	3120.8	357.8	454.3	812.1	1372656	0.693224	0.973473	1767	1800	3567	1512	1977	3489	4240	5014	9254	3104.3	3116.2	6220.5	2104	3083	5187	2110	2083	4193	8223	7013	15236	9339	11873	21212	9663
OAS31363	1	67.2761	1	29	14	R	10797.4	11210	22007.4	364.3	396.1	760.4	3963.2	4352.7	8315.9	1397.3	1574.9	2972.2	427.5	504.6	932.1	1611150	0.751653	1.10897	1670	1651	3321	1229	1157	2386	6073	4856	10929	3119.7	3480.5	6600.2	2309	2868	5177	1956	1535	3491	9082	8540	17622	11580	14830	26410	9619
OAS31365	1	65.6016	2	30	16	L	5134.9	4804.6	9939.5	193.3	252.8	446.1	3686.3	3866.2	7552.5	1589	1696.2	3285.2	528	608.3	1136.3	1294182	0.763103	1.03585	1853	1903	3756	1887	2147	4034	4782	4110	8892	3017.8	3157.9	6175.7	2869	3578	6447	1470	1481	2951	7781	8635	16416	8231	9895	18126	8686
OAS31366	1	67.3811	2	29	12	R	13616.8	13584	27200.8	228.8	256.9	485.7	3487.1	3618.5	7105.6	1479.8	1534.8	3014.6	400.9	482.1	883	1445319	0.735164	1.02889	2685	2321	5006	1220	1886	3106	5355	5243	10598	3057.7	3286.1	6343.8	2310	3046	5356	1539	1740	3279	9986	8495	18481	11891	13998	25889	8601
OAS31367	1	54.7043	2	30	18	R	15733.3	15064.1	30797.4	252.6	316	568.6	4243.9	4342.3	8586.2	1449.7	1805.8	3255.5	494.6	533.1	1027.7	1641113	0.722276	1.10264	2271	2413	4684	1535	1913	3448	5938	4967	10905	3932.2	3930.4	7862.6	2213	2187	4400	1765	1703	3468	8858	8959	17817	10951	14305	25256	9961
OAS31369	1	63.7055	2	30	16	R	15149.8	14022.6	29172.4	475.9	335.5	811.4	4198.3	4158.4	8356.7	1714	1652.3	3366.3	548.3	530.2	1078.5	1567594	0.791196	1.14103	1919	2260	4179	1587	1778	3365	5165	6782	11947	3050.3	3215.5	6265.8	3531	3976	7507	1736	1973	3709	8959	8719	17678	12331	14592	26923	10375
OAS31370	1	70.3493	2	27	18	R	19174.5	23173.4	42347.9	1023.2	733.2	1756.4	3408.2	3449.8	6858	1656.4	1625.4	3281.8	353.1	350.4	703.5	1635999	0.715717	1.03834	3231	2022	5253	1441	1557	2998	5980	5852	11832	4160.7	5037.4	9198.1	3170	3631	6801	1797	1869	3666	8263	9357	17620	12317	14290	26607	9661
OAS31371	1	46.1237	1	30	20	R	7502.6	9641.7	17144.3	257.5	297.7	555.2	4464.1	4472.7	8936.8	1810.6	1862.1	3672.7	631.2	667.9	1299.1	1749549	0.793882	1.12453	2334	2061	4395	1697	1862	3559	6488	6113	12601	3720.9	3883.4	7604.3	4361	4336	8697	1864	1539	3403	11669	10510	22179	9636	15391	25027	11492
OAS31373	1	67.0793	1	30	18	R	9316.3	9999.3	19315.6	281.8	265.7	547.5	3922.5	4162.9	8085.4	1626.6	1731.8	3358.4	547.1	554.3	1101.4	1747192	0.750306	1.102	2572	1881	4453	1708	1541	3249	6885	4654	11539	2872.2	3175.2	6047.4	2556	3266	5822	2063	2504	4567	9631	11005	20636	11823	13732	25555	12198
OAS31378	1	70.7842	1	30	18	R	24796.4	28219.9	53016.3	1276.1	1006.1	2282.2	4497.2	4419.7	8916.9	2215.1	2176.5	4391.6	569.5	493.2	1062.7	1720567	0.641708	0.98812	1251	2026	3277	1742	2828	4570	6401	5429	11830	3104.8	3323.5	6428.3	2441	2826	5267	1062	1920	2982	5898	8289	14187	8568	12849	21417	5835
OAS31380	1	70.6365	2	29	18	R	6579	4377.4	10956.4	319	143.6	462.6	3523.5	3605.2	7128.7	1360.7	1458.2	2818.9	456.1	453	909.1	1420599	0.847712	1.27839	1337	1584	2921	939	1773	2712	4633	5097	9730	3082.3	3174	6256.3	2764	2671	5435	1463	1641	3104	7139	6969	14108	9453	10322	19775	8577
OAS31381	1	71.2689	1	30	15	R	13921.7	9892.9	23814.6	517.2	622	1139.2	4113.4	4836.1	8949.5	1506.2	1944.8	3451	454.9	647.3	1102.2	1871943	0.726664	1.09745	2775	2000	4775	1949	1510	3459	8190	7584	15774	3080.6	3367.7	6448.3	3287	3633	6920	1826	1891	3717	12769	11601	24370	12461	17719	30180	10152
OAS31382	1	65.1271	1	30	18	L	25694	26486	52180	506.6	491	997.6	3247.6	3439	6686.6	1472.6	1716.2	3188.8	417.6	429.9	847.5	1509328	0.693175	1.00667	1911	2039	3950	540	1972	2512	6122	6549	12671	3060	3345.6	6405.6	2420	2979	5399	1646	866	2512	8411	6795	15206	10643	14141	24784	9989
OAS31383	1	61.3209	2	30	13	R	10037	9053.2	19090.2	405.9	455.1	861	4103.4	4097.4	8200.8	1939.7	1920.9	3860.6	503.8	649.4	1153.2	1478113	0.718692	1.03589	2294	2097	4391	1592	1558	3150	5635	5329	10964	3433.1	3571.8	7004.9	2627	3208	5835	2513	2452	4965	8097	7232	15329	11756	12838	24594	12018
OAS31388	1	65.5722	1	27	16	L	14321.7	13040.9	27362.6	676.9	389.9	1066.8	3795.9	3890.7	7686.6	1654.2	1623.9	3278.1	339.6	430.9	770.5	1743063	0.70058	1.06011	2050	1556	3606	1622	1697	3319	4150	3679	7829	4323.4	4591.6	8915	3415	3515	6930	2456	2018	4474	10052	10090	20142	11141	12622	23763	8393
OAS31390	1	73.1966	2	30	16	R	13030.5	11184.2	24214.7	523.3	208.5	731.8	3469.4	3559.2	7028.6	1443.2	1442.4	2885.6	480.5	539.4	1019.9	1514759	0.764499	1.08256	2079	2067	4146	1596	1767	3363	5002	5853	10855	3089.8	3083.6	6173.4	2444	2605	5049	1679	1939	3618	8308	7755	16063	9847	12681	22528	9621
OAS31391	1	71.071	1	30	18	R	11109.7	12663.7	23773.4	556.6	502.1	1058.7	4206.5	4479.8	8686.3	1867.9	1906.7	3774.6	509	498.3	1007.3	1647614	0.712378	1.0146	2202	2013	4215	1481	2145	3626	5991	5902	11893	3368.9	3817.8	7186.7	3804	4145	7949	1690	1816	3506	10335	10756	21091	9829	11925	21754	9320
OAS31392	1	55.7298	1	30	18	R	10128.1	11058.4	21186.5	226.9	247.8	474.7	4756.8	4179.5	8936.3	1900.6	2030.9	3931.5	611.7	648.9	1260.6	1596135	0.730403	1.01855	2920	2325	5245	1780	2061	3841	4790	4472	9262	3525	3693.9	7218.9	3665	3712	7377	2021	1675	3696	11158	9400	20558	10365	14630	24995	11441
OAS31393	1	59.0971	2	30	16	R	6452.8	7023.9	13476.7	346.2	297.1	643.3	4273.5	4325	8598.5	1575.3	1807.2	3382.5	564.1	601	1165.1	1493780	0.992618	1.38815	2590	1545	4135	1354	1784	3138	5290	5574	10864	3372.3	3406.6	6778.9	2659	2348	5007	1512	1351	2863	8817	8384	17201	10302	15375	25677	8432
OAS31394	1	68.4155	2	30	18	R	7531.9	4850	12381.9	177.2	255.1	432.3	3118.3	3367.2	6485.5	1162.8	1370.8	2533.6	399.5	522.3	921.8	1303341	0.781039	1.0929	1685	1562	3247	1525	1592	3117	4809	4144	8953	2570	2553.4	5123.4	2814	2990	5804	1159	1243	2402	7629	7656	15285	9623	10432	20055	8419
OAS31395	1	70.1022	1	29	15	R	21942.8	20002.8	41945.6	1066.3	589.9	1656.2	4584.6	4836.9	9421.5	2108.8	2355	4463.8	626.4	709.1	1335.5	1748577	0.737447	1.00372	1957	1826	3783	1517	1484	3001	8832	6721	15553	3819.8	3855.4	7675.2	2812	3921	6733	3888	3630	7518	9685	8818	18503	8990	15022	24012	11490
OAS31397	1	75.891	1	30	16	R	13653	11609.7	25262.7	363.9	415.6	779.5	3937.8	4109.5	8047.3	1597.3	1939.8	3537.1	444.7	549.9	994.6	1660473	0.713306	1.06437	1789	1881	3670	1428	1850	3278	5852	6191	12043	2881.6	3058.7	5940.3	2721	3346	6067	2295	2326	4621	8369	9219	17588	10782	13616	24398	10247
OAS31398	1	65.6921	2	28	16	R	32644.2	23993.7	56637.9	370.7	326.6	697.3	3597.4	3820.6	7418	1783.8	1705.2	3489	556.1	540.4	1096.5	1730961	0.713642	0.983441	3577	2064	5641	1623	2226	3849	5175	6034	11209	3627.6	3788.6	7416.2	3466	3783	7249	1407	1664	3071	9304	10189	19493	15559	15252	30811	12111
OAS31401	1	75.6932	2	30	16	R	21590.5	19467.9	41058.4	2012.4	1255.6	3268	3245	3619.2	6864.2	1096.7	1414.8	2511.5	450.2	505.8	956	1627177	0.721455	1.04842	2742	1905	4647	1882	2370	4252	4055	5375	9430	3530.3	3487.3	7017.6	2451	3178	5629	1178	1732	2910	8611	8865	17476	10332	11019	21351	8972
OAS31405	2	56.0237	1	27	12	R	9206.5	6805.2	16011.7	511	458	969	3402.3	3403.7	6806	1614.6	1661.4	3276	500.6	505.2	1005.8	1317793	0.700691	1.02328	1386	1295	2681	1549	1344	2893	4628	3075	7703	3002.7	3078.2	6080.9	3142	2679	5821	2060	1558	3618	7841	7799	15640	7450	9238	16688	6648
OAS31407	1	65.9621	2	30	18	R	6582.8	7583.1	14165.9	109.2	265.8	375	3717.7	4054.3	7772	1626.2	1585.7	3211.9	451.3	506.4	957.7	1337785	0.712262	1.00138	2227	2037	4264	1847	2491	4338	5314	4514	9828	3342.5	3324	6666.5	2670	2977	5647	1934	1412	3346	7179	7483	14662	10132	13658	23790	8641
OAS31408	1	78.2588	1	30	18	R	22102.9	29340.4	51443.3	1169.6	888.3	2057.9	4002.2	3685.2	7687.4	1320	1624.1	2944.1	414	414.4	828.4	1720519	0.66758	1.00701	1979	1708	3687	1043	1728	2771	5984	5321	11305	3315.2	3112.8	6428	3175	4435	7610	1830	1665	3495	10369	9461	19830	13169	14620	27789	9673
OAS31411	1	71.1272	1	29	18	R	16265.2	16990.4	33255.6	686.4	532.4	1218.8	4358.1	4380.6	8738.7	1486	1665.7	3151.7	473.1	522.2	995.3	1769879	0.735518	1.15264	2475	1574	4049	1696	2175	3871	5896	6319	12215	3450.1	3890.3	7340.4	4102	3653	7755	2291	2062	4353	9185	8582	17767	11734	14608	26342	12146
OAS31412	1	68.7104	2	30	16	R	18373	17703.1	36076.1	626.6	671.8	1298.4	3283.1	3392.9	6676	1743	1548.7	3291.7	443.3	536.7	980	1354060	0.700118	1.01717	1631	1665	3296	1666	1457	3123	4881	4411	9292	2753.9	3128.7	5882.6	2182	2305	4487	1702	1690	3392	7589	8864	16453	9059	11243	20302	7093
OAS31413	1	74.9498	2	29	18	R	13962.7	9041.1	23003.8	376.9	392.7	769.6	3128.1	3529.7	6657.8	1469.5	1515.3	2984.8	608.5	587.8	1196.3	1351180	0.701484	1.05353	1932	1855	3787	829	1201	2030	5933	4912	10845	3642.8	3914.9	7557.7	2241	3037	5278	1482	1566	3048	9044	9243	18287	10391	10712	21103	9055
OAS31414	1	73.8382	1	30	17	R	11415.6	14042.4	25458	803.8	960	1763.8	3899.9	3763.1	7663	1373.5	1789.8	3163.3	358.4	559.3	917.7	1542800	0.680292	0.991898	1962	1742	3704	1688	1634	3322	5231	4792	10023	3862.6	3788.1	7650.7	2510	2604	5114	1895	1687	3582	7841	8515	16356	8349	10935	19284	9331
OAS31415	1	65.3744	1	29	16	L	34098.3	32742.6	66840.9	1758.1	1699.6	3457.7	3047.1	3160.9	6208	1182.7	1397.4	2580.1	292.1	287.3	579.4	1507924	0.657497	0.968421	2021	1957	3978	1210	1410	2620	5318	4686	10004	2995	3259.9	6254.9	2939	3124	6063	1651	1811	3462	9694	9675	19369	11830	13143	24973	9470
OAS31421	1	71.7488	2	29	16	R	9189	10049.5	19238.5	233.5	369.4	602.9	3400.1	3609.5	7009.6	1475.2	1677.7	3152.9	471.4	480.5	951.9	1250838	0.699656	1.01827	1923	1342	3265	1584	1176	2760	3946	4299	8245	2650.7	2664.9	5315.6	2703	3133	5836	1554	1557	3111	8089	7473	15562	8490	10125	18615	9416
OAS31423	1	70.6177	2	30	16	R	26385.7	19341	45726.7	882.9	761.9	1644.8	3513.8	3687.4	7201.2	1010.2	1389	2399.2	426.4	517	943.4	1422403	0.881925	1.25944	1595	1768	3363	1238	1329	2567	5271	4725	9996	3165.5	3216.1	6381.6	3053	2778	5831	1421	1526	2947	8241	8124	16365	9436	11353	20789	8249
OAS31427	1	75.5549	2	30	16	R	8374.1	7126.9	15501	356.1	469	825.1	3322.3	3443.2	6765.5	1194.9	1280.7	2475.6	405.4	537.4	942.8	1365281	0.779374	1.15106	1511	1601	3112	1709	1760	3469	4792	4642	9434	3116.7	3383.7	6500.4	2533	3222	5755	1515	1596	3111	8183	8189	16372	9569	12064	21633	10217
OAS31428	1	77.2411	2	30	20	R	14480.9	16545.7	31026.6	711.6	666.2	1377.8	3879.1	4200.5	8079.6	1624.8	1806.9	3431.7	456	605.1	1061.1	1489930	0.724346	1.0144	2254	1639	3893	2313	2078	4391	6194	5158	11352	3555.2	3775.1	7330.3	2616	3179	5795	1900	1914	3814	9788	9474	19262	8525	10641	19166	9304
OAS31430	1	67.5566	1	30	18	R	13219.6	12163	25382.6	764.8	629.9	1394.7	4313.8	4618.5	8932.3	1730.7	1884.5	3615.2	508.1	557.2	1065.3	1913806	0.696266	1.10129	2926	2286	5212	1743	1594	3337	5663	5595	11258	3614.3	3890.6	7504.9	2917	3660	6577	2503	2160	4663	9485	10777	20262	10453	10829	21282	10398
OAS31431	1	67.3544	2	28	18	R	4718	3241	7959	416.8	499.7	916.5	4074.3	4501.9	8576.2	1470.2	2121.9	3592.1	513.5	717.4	1230.9	1706357	0.979387	1.43776	2247	1946	4193	1257	2163	3420	7137	5776	12913	3655	3405.9	7060.9	2518	3463	5981	1720	1594	3314	9827	9249	19076	11842	12154	23996	9810
OAS31433	1	75.6194	2	29	18	R	21137.5	24558	45695.5	400.5	513.9	914.4	3417.2	3271.8	6689	1255.5	1509.8	2765.3	302.5	481.7	784.2	1454814	0.748241	1.14728	2054	1566	3620	1414	1778	3192	4064	4252	8316	3363.1	3355.7	6718.8	1966	2383	4349	1357	1469	2826	6580	7052	13632	10383	10145	20528	8036
OAS31435	1	59.5971	2	30	18	R	5303.5	5114.9	10418.4	184.7	228.7	413.4	4078.6	4102.8	8181.4	1424	1626.4	3050.4	559.3	541.1	1100.4	1475291	0.806539	1.12173	1885	2251	4136	1568	2665	4233	5287	5102	10389	2974.1	3203.8	6177.9	3776	3518	7294	1949	1728	3677	11286	10498	21784	11028	13489	24517	11509
OAS31436	1	51.537	1	30	20	R	9874.3	9993	19867.3	474.7	351.4	826.1	4292.3	4372.5	8664.8	1978.8	1798.2	3777	618.3	753.6	1371.9	1735044	0.714509	1.01087	2248	2013	4261	1610	2562	4172	5291	4770	10061	3327.4	3510	6837.4	4169	4988	9157	2111	2069	4180	11456	10541	21997	9676	11938	21614	9799
OAS31437	1	59.3387	1	30	20	R	10556.5	9940	20496.5	270.4	446.2	716.6	5022.3	5065	10087.3	2727.4	3063.1	5790.5	737.8	799.8	1537.6	1997952	0.778794	1.04726	1809	1971	3780	1897	2371	4268	8019	7102	15121	4130	4338.4	8468.4	3584	4205	7789	2034	2346	4380	11287	11663	22950	12768	16283	29051	14483
OAS31440	1	70.6711	2	29	20	R	7421	7072.6	14493.6	210.3	361.3	571.6	3234.3	3106.3	6340.6	1320.7	1238.7	2559.4	453.5	522.7	976.2	1320719	0.739606	1.12281	1777	1415	3192	1282	1705	2987	4654	3667	8321	3279.7	3335.9	6615.6	2323	2191	4514	1281	1102	2383	7534	7589	15123	7743	8951	16694	6906
OAS31441	1	60.506	1	30	16	R	23875.4	19015.2	42890.6	1163.5	763.4	1926.9	3896.7	4113.4	8010.1	1680.3	1913.2	3593.5	585.4	556.7	1142.1	1729214	0.699833	0.998842	2372	2061	4433	1820	1819	3639	5963	4768	10731	3251.2	3501.6	6752.8	3001	3805	6806	1600	2171	3771	10024	9254	19278	13019	14951	27970	8911
OAS31446	1	81.2244	1	30	20	R	16823.4	13611.6	30435	1034.9	766.9	1801.8	3196.5	3319.9	6516.4	1405.5	1418.8	2824.3	391.6	498.2	889.8	1584315	0.839596	1.25092	1875	1977	3852	1460	1542	3002	3581	5196	8777	3325	3174	6499	2645	2743	5388	2595	1869	4464	8693	7860	16553	9835	14323	24158	9876
OAS31447	1	49.9071	2	29	16	R	12033.5	10212.6	22246.1	216.7	146.2	362.9	3916.2	3916	7832.2	1996.4	1844.4	3840.8	667.5	686.3	1353.8	1507329	0.769263	1.04704	2740	2136	4876	916	2151	3067	6075	5705	11780	3561.1	3715.1	7276.2	2391	2567	4958	1513	1933	3446	9740	9749	19489	10667	12870	23537	10548
OAS31448	1	70.3404	1	30	20	R	30985.2	36841.6	67826.8	604.4	594.5	1198.9	3893.7	3691.3	7585	1841.3	1681.6	3522.9	492.1	535	1027.1	1775096	0.690102	1.00999	2914	1937	4851	1596	2341	3937	5061	4578	9639	3353.4	3116.7	6470.1	2599	3102	5701	2104	1772	3876	9094	10386	19480	10246	14669	24915	9692
OAS31449	1	72.9349	2	30	18	L	16304.4	14120.3	30424.7	842.2	627.9	1470.1	4062.6	4292.7	8355.3	1168.1	1458	2626.1	282.8	380.2	663	1458618	0.761747	1.19624	1859	1379	3238	1466	1056	2522	5537	3848	9385	2761.4	2837.4	5598.8	2755	3675	6430	2033	1609	3642	6692	7177	13869	8612	7963	16575	10980
OAS31453	1	65.487	1	28	20	R	22278.2	23561	45839.2	915.5	935	1850.5	4026.6	4041.9	8068.5	1845.9	2075.3	3921.2	535.3	534.4	1069.7	1755679	0.715409	1.03418	3323	1830	5153	1204	1644	2848	6088	6335	12423	3230.8	3316.5	6547.3	2722	3392	6114	1957	1701	3658	9709	10376	20085	13357	13684	27041	10812
OAS31455	1	87.5916	1	30	16	R	28108.3	27142.7	55251	1245.5	1082.6	2328.1	3784.5	3514.1	7298.6	1374.1	1241.8	2615.9	306.9	426.7	733.6	1497327	0.671395	1.01306	1798	1780	3578	1299	2052	3351	5476	4422	9898	3380.7	3509	6889.7	3226	3447	6673	1771	2142	3913	10230	9028	19258	8003	10680	18683	8800
OAS31456	1	54.8099	2	30	18	R	8107.8	8985.8	17093.6	217	272.4	489.4	4592.5	4720.9	9313.4	2036.9	2031.2	4068.1	619.5	682	1301.5	1832879	0.738888	1.08149	1909	2039	3948	2811	2049	4860	6199	5278	11477	3243.4	3394.1	6637.5	3205	4076	7281	1654	1329	2983	7607	8388	15995	11782	13838	25620	9867
OAS31457	1	63.3938	2	29	18	R	8985.7	10663.3	19649	198.2	257.3	455.5	3675.9	3999.6	7675.5	1684	1598.3	3282.3	431	443.3	874.3	1309699	0.723669	1.00547	2118	2050	4168	1597	1478	3075	4543	4785	9328	3027.1	3163.8	6190.9	2841	3442	6283	1952	1751	3703	7324	8246	15570	7895	10550	18445	7298
OAS31458	1	86.5433	1	29	16	R	18209.4	28817.9	47027.3	1012.9	948.3	1961.2	4402.3	4058	8460.3	1662.2	1904.3	3566.5	610.8	600.8	1211.6	1877498	0.677647	1.03573	2505	2332	4837	2701	2050	4751	5884	6486	12370	3884.6	3858.8	7743.4	3204	4404	7608	2499	2077	4576	9714	10053	19767	10515	13669	24184	13358
OAS31459	1	61.6371	2	30	18	R	5828.4	5860.7	11689.1	292.6	174.4	467	3923.3	4227.1	8150.4	1654.9	1611.5	3266.4	320.4	448.5	768.9	1509014	0.851692	1.21292	2497	2185	4682	1857	1923	3780	5496	5061	10557	2948.3	3211.7	6160	3161	3080	6241	1752	1566	3318	10183	9128	19311	11842	15679	27521	11084
OAS31460	1	61.2272	2	30	16	R	11409	12963.1	24372.1	306.6	364.6	671.2	3680.8	3632.3	7313.1	1790	1937	3727	518	550	1068	1672198	0.750519	1.06079	2812	2467	5279	868	958	1826	5421	5105	10526	3494.7	4088.2	7582.9	2706	3147	5853	1704	1347	3051	8971	9495	18466	13113	13333	26446	10230
OAS31462	1	70.4716	2	29	18	R	10069	9862.2	19931.2	526.3	660.9	1187.2	2952.2	2673.9	5626.1	1425.7	1297.4	2723.1	252.2	326.8	579	1262506	0.715498	1.03344	1306	1441	2747	941	1466	2407	4393	4273	8666	2648.5	2898.9	5547.4	2255	2652	4907	2014	1460	3474	7299	6808	14107	8422	10173	18595	8261
OAS31464	1	77.2889	2	29	18	R	19772.8	20943.9	40716.7	635.9	786.2	1422.1	3684	3663.9	7347.9	1409.7	1646.9	3056.6	486.2	519.5	1005.7	1587444	0.710967	1.03384	1898	1714	3612	1425	1079	2504	5819	5261	11080	3031.1	3164.4	6195.5	2468	2760	5228	1619	1339	2958	10285	9584	19869	12181	13747	25928	9680
OAS31465	1	63.0671	2	30	20	R	10060.9	8274.5	18335.4	275.1	184	459.1	3058.7	3264	6322.7	1515.1	1426.6	2941.7	296.9	464.7	761.6	1117069	0.747903	1.02735	2057	1767	3824	1173	1327	2500	3673	3664	7337	2914	2927.9	5841.9	2109	2780	4889	1463	1542	3005	7669	7231	14900	8833	10253	19086	8438
OAS31469	1	73.6016	1	29	12	R	22387.7	17900.1	40287.8	882.1	819.7	1701.8	4493.6	4550.3	9043.9	1797.9	1926.9	3724.8	682.6	722.4	1405	1798264	0.718959	1.00629	1664	1776	3440	1929	3200	5129	6285	7134	13419	3774.8	3952.8	7727.6	2940	3472	6412	2276	2456	4732	11231	11988	23219	9762	13929	23691	15484
OAS31470	1	64.9294	2	25	14	R	8968.4	8064	17032.4	232.1	385.1	617.2	3879.3	4373.3	8252.6	1809.8	1877.1	3686.9	492.5	518.4	1010.9	1646547	0.742126	1.06331	2134	2124	4258	2408	1772	4180	6041	6276	12317	3182	3097	6279	2338	2751	5089	2122	1806	3928	9697	7772	17469	10530	11451	21981	10989
OAS31471	1	65.4638	1	30	18	R	12492.8	12354.3	24847.1	346.8	424.9	771.7	4745.1	4741	9486.1	1944.8	1903.9	3848.7	538.7	661.2	1199.9	1828925	0.734614	1.1301	3457	3715	7172	1602	2308	3910	6401	6091	12492	4099.7	4330.5	8430.2	2703	2698	5401	1912	1766	3678	11305	9675	20980	14212	18050	32262	10893
OAS31472	1	67.3949	2	30	18	R	26306.7	29017.5	55324.2	719.3	601.6	1320.9	3875.5	3866.2	7741.7	1650.4	1850.2	3500.6	471.5	480.9	952.4	1404926	0.71951	0.972199	1796	1503	3299	1429	1561	2990	5181	4433	9614	3254.6	3251.3	6505.9	2531	2830	5361	1991	1711	3702	8782	8821	17603	9395	12417	21812	9882
[truncated: 83 more columns]
